# Supplementary material for: Molecular Tools for the Study of ADP‐Ribosylation: A Unified and Versatile Method to Synthesise Native Mono‐ADP‐Ribosylated Peptides
Source: PubMed Central journal article supplement (PMC8360141; doi:10.1002/chem.202100337), 2021-05-06

# Chemistry–A European Journal

Supporting Information

## **Molecular Tools for the Study of ADP-Ribosylation: A Unified and Versatile Method to Synthesise Native Mono- ADP-Ribosylated Peptides**

Jim Voorneveld<sup>+</sup>, Johannes Gregor Matthias Rack<sup>+</sup>, Luke van Gijlswijk, Nico J. Meeuwenoord, Qiang Liu, Herman S. Overkleeft, Gijsbert A. van der Marel, Ivan Ahel,<sup>\*</sup> and Dmitri V. Filippov<sup>\*</sup>

## Building block synthesis

### Ribofuranosylated Fmoc-amino acids

The glycosylation procedure toward the respective ribofuranosylated Fmoc-amino acids was optimized by testing two ribosyl donors, the known *N*-(phenyl)trifluoroacetimidate donor **10**<sup>[1]</sup> and trichloroacetimidate<sup>[2]</sup> donor **9** (Scheme S1A). Trichloroacetamide donor **9** (Scheme S1A) was prepared in 90% yield by treating known partially protected ribose **S1**<sup>[1]</sup> with trichloroacetonitrile in the presence of DBU whereas trifluoroacetamide donor **10** was obtained in 75% yield by reacting **S1** with 2,2,2-trifluoro-*N*-phenyl-acetimidoyl chloride in the presence of Cs<sub>2</sub>CO<sub>3</sub>.<sup>[1]</sup>

Scheme S1B shows the synthesis of the appropriately protected serine **13**,<sup>[3,4]</sup> threonine **14**<sup>[3]</sup> and cysteine **15** to be used as the acceptors. To prepare appropriately protected Ser acceptor **13**, commercially available Fmoc-Ser-OH (**S2**) was treated with allyl bromide and DIPEA. For the synthesis of Thr and Cys acceptors **14** and **15** the corresponding side chain protected Fmoc-amino acids **S3** and **S4** were converted in allyl esters **S5** and **S6** under the same conditions as used for **13**. Subsequent removal of the acid sensitive side chain protecting groups with TFA yielded acceptors **14** and **15**.

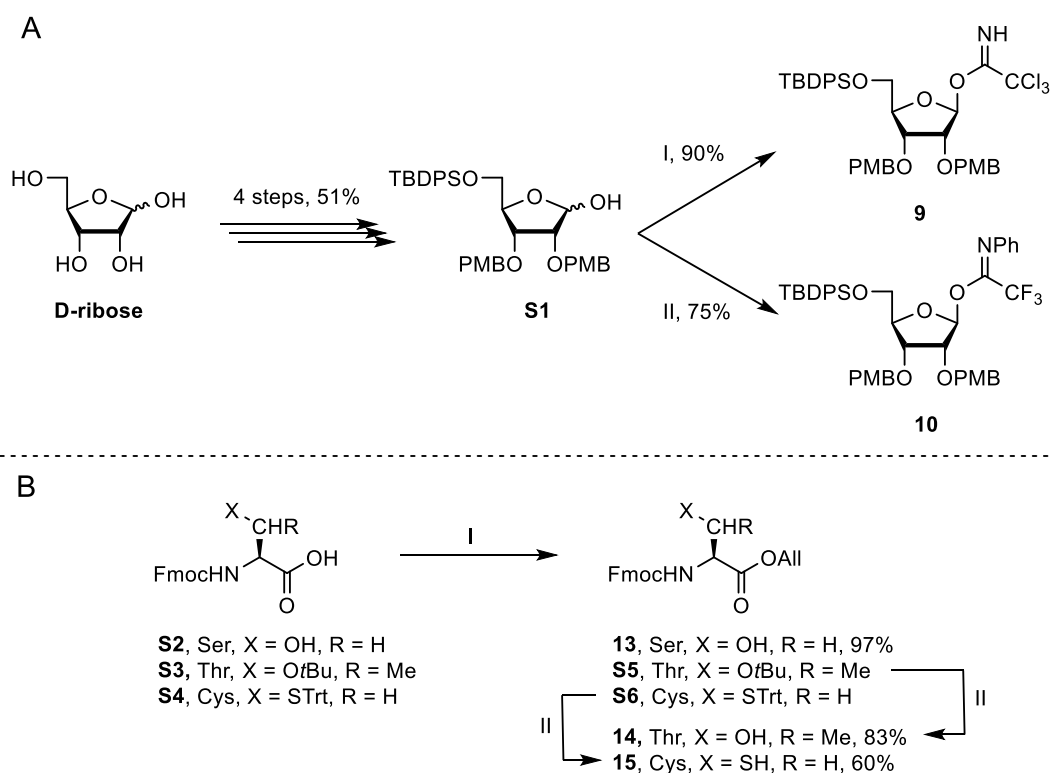

**Scheme S1.** **A)** Synthesis of ribosyl donors **9** and **10**. Reagents and conditions **I)** Cl<sub>3</sub>CCN, DBU, acetonitrile. **II)** Cl(C=NPh)CF<sub>3</sub>, Cs<sub>2</sub>CO<sub>3</sub>, acetone. **B)** synthesis of amino acid acceptors **13**, **14** and **15**. Reagents and conditions: **I)** Allyl-Br, DIPEA, DMF. **II)** TFA, DCM.

## Experimental section

### Expression plasmids and protein purification

The construction of the expression plasmids and the purification procedures were described earlier.<sup>[5–7]</sup> Briefly, expression plasmids were transferred into Rossetta (DE3) cells and grown to an OD<sub>600</sub> of 0.6 in LB medium supplemented with appropriate antibiotics. For metal-coordinating proteins the medium was further enriched either by addition of 2 mM MgSO<sub>4</sub> (ARHs) or 100 μM ZnCl<sub>2</sub> (*SpyMacroD*). Expression was induced with 0.4 mM isopropyl β-D-1-thiogalactopyranoside (IPTG) and cultures were allowed to grow further overnight at 17 °C. Cultures were harvested by centrifugation, pellets resuspended in lysis buffer (50 mM TrisHCl [pH 8], 500 mM NaCl and 25 mM imidazole) and stored at -20 °C. Proteins were purified by Ni<sup>2+</sup>-NTA chromatography (Jena Bioscience) according to the manufacturer's protocol using the following buffers: all buffers contained 50 mM TrisHCl (pH 8) and 500 mM NaCl; additionally, the lysis buffer contained 25 mM, the washing buffer 40 mM, and the elution buffer 500 mM imidazole. Proteins were dialyzed overnight against 50 mM TrisHCl (pH 8), 200 mM NaCl, 1 mM dithiothreitol and 5% (v/v) glycerol and stored at -80 °C. For the purification of ARH and ARH-like proteins all purification buffers were additionally supplemented with 10 mM MgCl<sub>2</sub>.

### (ADP-ribosyl)hydrolase activity assay

The peptide demodification assay was described earlier<sup>[8]</sup>. Briefly, peptide concentration for the assay were estimated using absorbance at λ<sub>260nm</sub> using the molar extinction coefficient of ADP-ribose (15,400 M<sup>-1</sup> cm<sup>-1</sup>). 20 μM indicated peptide were demodified by incubation with 1 μM hydrolase for 45 min at 30 °C in assay buffer (50 mM TrisHCl [pH 8], 200 mM NaCl, 10 mM MgCl<sub>2</sub>, 1 mM dithiothreitol and 0.2 μM human NUDT5<sup>[9]</sup>). Reactions were stopped and analyzed by performing the AMP-Glo™ assay (Promega) according to the manufacturer's protocol. Luminescence was recorded on a SpectraMax M5 plate reader (Molecular Devices) and data analyzed with GraphPad Prism 7. Control reactions were carried out in absence of peptide.

### General synthetic procedures

All reagents were of commercial grade and used as received unless stated otherwise. Solvents used in synthesis were dried and stored over 4 Å molecular sieves, except MeOH and MeCN which were stored over 3 Å molecular sieves. Triethylamine (TEA) and Di-isopropylethylamine (DIPEA) were stored over KOH pellets. Column chromatography was performed on silica gel 60 Å (40–63 μm, Macherey-Nagel). TLC analysis was performed on Macherey-Nagel aluminium sheets (silica gel 60 F<sub>254</sub>). TLC was used to visualize compounds by UV at wavelength 254 nm and by spraying with either cerium molybdate spray (25 g/L (NH<sub>4</sub>)<sub>6</sub>Mo<sub>7</sub>O<sub>24</sub>, 10 g/L (NH<sub>4</sub>)<sub>4</sub>Ce(SO<sub>4</sub>)<sub>4</sub>·H<sub>2</sub>O in 10% H<sub>2</sub>SO<sub>4</sub> water solution) or KMnO<sub>4</sub> spray (20 g/L KMnO<sub>4</sub> and 10 g/L K<sub>2</sub>CO<sub>3</sub> in water) followed by charring at c.a. 250 °C. LC-MS analysis was performed on a Finnigan Surveyor HPLC system with a Nucleodur C18 Gravity 3 μm 50 x 4.60 mm column (detection at 200–600 nm) coupled to a Finnigan LCQ Advantage Max mass spectrometer with ESI or coupled to a Thermo LCQ Fleet Ion mass spectrometer with ESI. The method used was 10→90% 13.5 min (0→0.5 min: 10% MeCN; 0.5→8.5 min: 10% to 90% MeCN; 8.5→11 min: 90% MeCN; 11→13.5 min: 10% MeCN) or 0→50% 13.5 min. <sup>1</sup>H and <sup>13</sup>C NMR spectra were recorded on a Bruker AV-400, AV-500 or AV-600 NMR. Chemical shifts (δ) are given in ppm relative to tetramethylsilane as internal standard. Coupling constants (*J*) are given in Hz. For

compounds **24** – **30**, a small amount of EDTA was added to the NMR sample to sharpen the peaks for  $^{31}\text{P}$ -NMR. All given  $^{13}\text{C}$ -APT spectra are proton decoupled.

### 1-(2,2,2-trichlororoacetimido)-2,3-O-di-(4-methoxybenzyl)-5-O-*tert*-butyldiphenylsilyl - $\alpha,\beta$ -D-ribofuranoside (**9**)

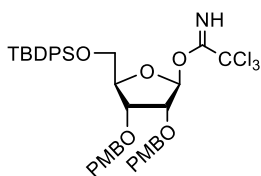

2,3-bis-*O*-(4-methoxybenzyl)-5-*O*-((*tert*-butyl)-diphenylsilyl)- $\alpha,\beta$ -D-ribofuranoside **S1** (1.01 gram, 1.6 mmol, 1 eq.) was co-evaporated thrice with toluene, dissolved in dry DCM (16 mL, 0.1 M) and the solution was cooled to 0 °C. DBU (0.11 mL, 0.74 mmol, 0.5 eq.) and trichloroacetonitrile (0.8 mL, 8.0 mmol, 5 eq.) were added and the solution was stirred at 0 °C for 1 hour after which the reaction was concentrated *in vacuo*. Purification by flash column chromatography in neutralized silica (5 -> 20% EtOAc in pentane with 1% TEA) yielded titled compound as a pale oil (1.11 g, 1.44 mmol, 90%). **Rf**: 0.85 (20% EtOAc in Pentane).  $^1\text{H}$  NMR (400 MHz,  $\text{CDCl}_3$ )  $\delta$  8.48 (s, 1H, NH acetimidate), 7.69 – 7.54 (m, 6H, H arom.), 7.46 – 7.33 (m, 6H, H arom.), 7.36 – 7.25 (m, 7H, H arom.), 7.18 (s, 1H, H arom.), 6.84 (dd,  $J$  = 25.9, 8.7 Hz, 3H, H arom.), 6.31 (s, 1H, H-1), 4.80 – 4.64 (m, 1H,  $\text{CH}_2$  PMB), 4.60 (d,  $J$  = 11.7 Hz, 1H,  $\text{CH}_2$  PMB), 4.46 (d,  $J$  = 11.3 Hz, 1H,  $\text{CH}_2$  PMB), 4.42 – 4.34 (m, 2H, H-4 +  $\text{CH}_2$  PMB), 4.17 – 4.11 (m, 1H, H-3), 4.06 (d,  $J$  = 4.8 Hz, 1H, H-2), 3.86 – 3.79 (m, 4H,  $\text{CH}_3$  PMB + H-5), 3.79 – 3.76 (m, 4H,  $\text{CH}_3$  PMB + H-5), 1.02 (s, 9H TBDPS).  $^{13}\text{C}$  NMR (101 MHz,  $\text{CDCl}_3$ )  $\delta$  161.1, 159.4, 135.7, 133.4, 130.0, 129.6, 127.8, 113.9, 103.9 (C-1), 83.7 (C-4), 78.6 (C-2), 76.6 (C-3), 72.1, 71.8 ( $\text{CH}_2$  PMB), 64.2 (H-5), 55.4, ( $\text{CH}_3$  PMB), 27.0 ( $\text{CH}_3$  TBDPS), 19.4 (Cq TBDPS).

### 1-*O*-((*N*-phenyl)-2,2,2-trifluoroacetimido) 2,3-bis-*O*-(4-methoxybenzyl)-5-*O*-((*tert*-butyl)-diphenylsilyl)- $\alpha,\beta$ -D-ribofuranoside (**10**)

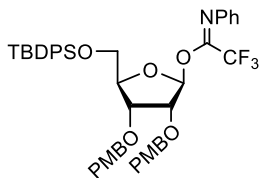

2,3-bis-*O*-(4-methoxybenzyl)-5-*O*-((*tert*-butyl)-diphenylsilyl)- $\alpha,\beta$ -D-ribofuranoside **S1** (6.28 gram, 10.0 mmol) was dissolved in acetone (50 mL, 0.2M).  $\text{Cs}_2\text{CO}_3$  (4.89 gram, 15.0 mmol, 1.5 eq.) and 2,2,2-trifluoro-*N*-phenylacetimidoyl chloride (1.74 mL, 11.0 mmol, 1.1 eq.) were added. The suspension was stirred for 2 hours before TLC indicated full conversion into a higher running product ( ). The reaction was filtered over a pad of Celite and the filtrate was concentrated *in vacuo*. Flash column chromatography in neutralized silica (10 -> 20%  $\text{Et}_2\text{O}$  in pentane) yielded titled compound as a pale oil (6.01 g, 7.51 mmol, 75%). Spectral data was in accordance with literary precedence.<sup>[1]</sup> **Rf**: 0.20 (10%  $\text{Et}_2\text{O}$  in pentane)  $^1\text{H}$  NMR (400 MHz,  $\text{CDCl}_3$ )  $\delta$  7.74 – 7.66 (m, 4H, TBDPS arom.  $\alpha+\beta$ ), 7.66 – 7.50 (m, 4H, NPh arom.  $\alpha+\beta$ ), 7.46 – 7.32 (m, 12H, TBDPS arom. + NPh arom.  $\alpha+\beta$ ), 7.32 – 7.17 (m, 12H, PMB arom.  $\alpha + \beta$ ), 7.12 – 7.00 (m, 2H, PMB arom.  $\alpha$ ), 6.91 – 6.72 (m, 12H, PMB arom.  $\alpha + \beta$ ), 6.48 (bs, 1H, H-1 $\alpha$ ), 6.30 (bs, 1H, H-2 $\beta$ ), 4.82 – 4.57 (m, 4H, 2x  $\text{CH}_2$  PMB  $\alpha/\beta$ ), 4.57 – 4.40 (m, 4H, 2x  $\text{CH}_2$  PMB  $\alpha/\beta$ ), 4.40 – 4.31 (m, 2H, H-4  $\alpha+\beta$ ), 4.26 (t,  $J$  = 5.5 Hz, 1H, H-3 $\beta$ ), 4.19 – 4.01 (m, 3H, H-2 $\alpha$  + H-2 $\beta$  + H-3 $\alpha$ ), 4.00 – 3.86 (m, 1H, H-5 $\alpha\beta$ ), 3.84 – 3.56 (m, 15H, H-5 $\beta$  + H-5 $\alpha$  + 2x  $\text{CH}_3$  PMB  $\alpha+\beta$ ), 1.07 (s, 9H, *t*Bu TBDPS  $\beta$ ), 0.97 (s, 9H, *t*Bu TBDPS  $\alpha$ ).  $^{13}\text{C}$  NMR (101 MHz,  $\text{CDCl}_3$ )  $\delta$  159.5, 159.4, 159.4, 159.2 (Cq PMB), 144.3, 143.9 (Cq NPh), 135.7, 135.6, 135.6, 135.5 (CH arom. TBDPS/NPh), 133.3, 133.1, 133.0, 132.7, 130.4 (Cq TBDPS/PMB), 129.9, 129.9, 129.7, 129.7 (CH arom.), 129.6 (Cq), 129.5 (CH arom.), 129.4 (Cq), 129.4, 129.3, 129.2, 128.7, 128.7, 127.8, 127.8, 127.7 (CH arom.), 124.2, 120.6, 119.6, 114.3, 113.9, 113.8, 113.8, 113.7 (CH arom. PMB), 102.8 (C-1 $\beta$ ), 85.7 (C-4 $\alpha$ ), 83.4 (C-4 $\beta$ ), 78.7 (C-2 $\alpha$ ), 78.4 (C-2 $\beta$ ), 76.0 (C-3 $\beta$ ), 75.2 (C-3 $\alpha$ ),

72.9, 72.3, 72.2, 71.9 (CH<sub>2</sub>PMB), 63.7 (C-5 $\beta$ ), 63.3 (C-5 $\alpha$ ), 55.5, 55.2, 55.1, 55.1 (CH<sub>3</sub> PMB), 26.8, 26.7 (CH<sub>3</sub> *t*Bu), 19.2, 19.2 (C $\alpha$  *t*Bu).

### N-fluorenylmethoxycarbonyl-serine-O-allyl ester (13)

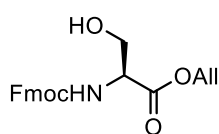

Fmoc-Ser-OH (3.45 g, 10 mmol, 1 eq) was co-evaporated thrice with 1,4-dioxane and dissolved DMF (50 mL, 0.2M). DIPEA (2.10 mL, 12 mmol, 1.2 eq) was added followed by the subsequent addition of allyl-bromide (1.04 mL, 12 mmol, 1.2 eq) and stirred overnight. The reaction was quenched with 100 mL water and transferred into a separatory funnel. The reaction mixture was extracted three times with Et<sub>2</sub>O. The combined organics were washed three times with brine, dried over MgSO<sub>4</sub> and concentrated *in vacuo*. Flash column chromatography (10 → 40% EtOAc in pentane) afforded titled compound as a white solid (3.58 g, 9.74 mmol, 97%). **Rf**: 0.49 (40% EtOAc in pentane). **<sup>1</sup>H NMR** (400 MHz, CDCl<sub>3</sub>)  $\delta$  7.77 (d, *J* = 7.5 Hz, 2H, Fmoc arom.), 7.61 (d, *J* = 6.8 Hz, 2H, Fmoc arom.), 7.41 (t, *J* = 7.4 Hz, 2H, Fmoc arom.), 7.32 (t, *J* = 7.5 Hz, 2H, Fmoc arom.), 5.99 – 5.84 (m, 1H, OCH<sub>2</sub>CHCH<sub>2</sub>), 5.73 (d, *J* = 7.2 Hz, 1H, NH), 5.35 (d, *J* = 17.1 Hz, 1H, CH<sub>2</sub> OCH<sub>2</sub>CHCH<sub>2a</sub>), 5.27 (d, *J* = 10.4 Hz, 1H, OCH<sub>2</sub>CHCH<sub>2b</sub>), 4.69 (d, *J* = 5.5 Hz, 2H, OCH<sub>2</sub>CHCH<sub>2</sub>), 4.51 – 4.40 (m, 3H, CH Ser + CH<sub>2</sub> Ser), 4.23 (t, *J* = 6.9 Hz, 1H, CH Fmoc), 4.04 (d, *J* = 10.7 Hz, 1H, CH<sub>2</sub> Fmoc), 3.95 (d, *J* = 10.6 Hz, 1H, CH<sub>2</sub> Fmoc), 2.15 (s, 1H, OH Ser). **<sup>13</sup>C NMR** (101 MHz, CDCl<sub>3</sub>)  $\delta$  170.4 (C=O COOAll), 156.4 (C=O Fmoc), 143.9, 143.8, 141.4 (C $\alpha$  Fmoc), 131.4 (OCH<sub>2</sub>CHCH<sub>2</sub>), 127.9, 127.2, 125.2, 120.1 (CH Fmoc arom.), 119.1 (OCH<sub>2</sub>CHCH<sub>2</sub>), 67.3 (CH<sub>2</sub> Fmoc), 66.5 (OCH<sub>2</sub>CHCH<sub>2</sub>), 63.3 (CH<sub>2</sub> Ser), 56.2 (CH Ser), 47.2 (CH Fmoc).

### N-fluorenylmethoxycarbonyl-threonine-O-allyl ester (14)

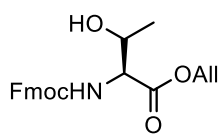

Fmoc-Cys(Trt)-OH (1.98 gram, 5 mmol) was co-evaporated thrice with 1,4-dioxane and dissolved in DMF (25 mL, 0.2M). DIPEA (1.04 mL, 6.0 mmol, 1.2 eq.) was added followed by allyl bromide (0.52 mL, 6.0 mmol, 1.2 eq.). The resulting solution was stirred overnight. The reaction was carefully quenched by the addition of water and the resulting slurry was transferred into a separatory funnel. The water layer was extracted thrice with Et<sub>2</sub>O and the combined organics were washed with brine, dried over MgSO<sub>4</sub> and concentrated *in vacuo*. The crude allylated cysteine was dissolved in 25 mL of a 10% TFA solution in DCM and TIS (4.1 mL, 20 mmol, 4.0 eq.) was added. The resulting solution was stirred for 3 hours after which TLC showed full conversion of the starting material. The reaction was diluted with toluene and concentrated *in vacuo*. The resulting oil was co-evaporated thrice with toluene. Flash column chromatography (10 → 40% EtOAc in pentane) yielded titled compound as a white solid (1.58 gram, 4.15 mmol, 83%). **Rf**: 0.65 (40% EtOAc in pentane). **<sup>1</sup>H NMR** (400 MHz, CDCl<sub>3</sub>)  $\delta$  7.77 (dt, *J* = 7.6, 0.9 Hz, 2H, Fmoc arom.), 7.62 (dd, *J* = 7.7, 4.2 Hz, 2H, Fmoc arom.), 7.46 – 7.38 (m, 2H, Fmoc arom.), 7.33 (dt, *J* = 7.5, 1.5 Hz, 2H, Fmoc arom.), 5.92 (ddt, *J* = 16.4, 11.0, 5.8 Hz, 1H, OCH<sub>2</sub>CHCH<sub>2</sub>), 5.60 (d, *J* = 9.1 Hz, 1H, NH), 5.35 (dd, *J* = 16.2, 1.7 Hz, 1H, OCH<sub>2</sub>CHCH<sub>2a</sub>), 5.27 (dd, *J* = 1.1 Hz, 1H, OCH<sub>2</sub>CHCH<sub>2b</sub>), 4.69 (d, *J* = 5.7 Hz, 2H, OCH<sub>2</sub>CHCH<sub>2</sub>), 4.49 – 4.34 (m, 4H, CH<sub>2</sub> Fmoc + 2x CH Thr), 4.25 (t, *J* = 7.1 Hz, 1H, CH Fmoc), 1.77 (s, 1H, OH), 1.27 (d, *J* = 6.3 Hz, 3H, CH<sub>3</sub> Thr). **<sup>13</sup>C NMR** (101 MHz, CDCl<sub>3</sub>)  $\delta$  144.0, 141.5, 131.5 (OCH<sub>2</sub>CHCH<sub>2</sub>), 127.9, 127.2, 125.3, 120.1, 119.2 (OCH<sub>2</sub>CHCH<sub>2</sub>), 68.2 (CH Thr), 67.4 (CH<sub>2</sub> Fmoc), 66.4 (OCH<sub>2</sub>CHCH<sub>2</sub>), 59.2 (CH Thr), 47.3 (CH Fmoc), 20.1 (CH<sub>3</sub> Thr).

### **N-fluorenylmethoxycarbonyl-cysteine-O-allyl ester (15)**

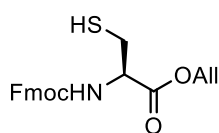

Fmoc-Cys(Trt)-OH (2.23 gram, 3.81 mmol) was co-evaporated thrice with toluene and dissolved in DMF (19 mL, 0.2M). DIPEA (0.80 mL, 4.6 mmol, 1.2 eq.) was added followed by allyl bromide (0.40 mL, 4.6 mmol, 1.2 eq.). The resulting solution was stirred overnight. The reaction was carefully quenched by the addition of water and the resulting slurry was transferred into a separatory funnel. The water layer was extracted thrice with Et<sub>2</sub>O and the combined organics were washed with brine, dried over MgSO<sub>4</sub> and concentrated *in vacuo*. The crude allylated cysteine was dissolved in 19 mL of a 10% TFA solution in DCM and TIS (3.1 mL, 15.2 mmol, 4.0 eq.) was added. The resulting solution was stirred for 4 hours in a dark environment after which TLC showed full conversion of the starting material. The reaction was diluted with toluene and concentrated *in vacuo*. The resulting oil was co-evaporated thrice with toluene. Flash column chromatography (5 -> 10% EtOAc in toluene) yielded titled compound as a white solid (875 mg, 2.28 mmol, 60%). **Rf**: 0.53 (10% EtOAc in toluene). <sup>1</sup>H NMR (400 MHz, CDCl<sub>3</sub>) δ 7.76 (dd, J = 7.6, 1.1 Hz, 2H, Fmoc arom.), 7.60 (d, J = 7.5 Hz, 2H, Fmoc arom.), 7.40 (t, J = 8.3, 6.8 Hz, 2H, Fmoc arom.), 7.32 (tt, J = 7.4, 1.5 Hz, 2H, Fmoc arom.), 5.92 (ddt, J = 16.5, 10.4, 5.8 Hz, 1H, OCH<sub>2</sub>CHCH<sub>2</sub>), 5.72 (bs, 1H, NH), 5.43 – 5.18 (m, 2H, OCH<sub>2</sub>CHCH<sub>2</sub>), 4.76 – 4.61 (m, 3H, CH Cys + OCH<sub>2</sub>CHCH<sub>2</sub>), 4.51 – 4.32 (m, 2H, CH<sub>2</sub> Fmoc), 4.23 (t, J = 6.9 Hz, 1H, CH Fmoc), 3.01 (dqt, J = 14.0, 8.8, 4.2 Hz, 2H, CH<sub>2</sub> Cys), 1.37 (t, J = 9.0 Hz, 1H, SH). <sup>13</sup>C NMR (101 MHz, CDCl<sub>3</sub>) δ 169.8 (C=O COOAll), 155.8 (C=O Fmoc), 143.9, 143.7, 141.4, 141.4 (Cq Fmoc), 131.4 (OCH<sub>2</sub>CHCH<sub>2</sub>), 127.9, 127.2, 127.2, 125.2, 125.2, 120.2, 120.1 (CH Fmoc arom.), 119.5 (OCH<sub>2</sub>CHCH<sub>2</sub>), 67.2 (CH<sub>2</sub> Fmoc), 66.6 (OCH<sub>2</sub>CHCH<sub>2</sub>), 55.3 (CH Cys), 47.3 (CH Fmoc), 27.3 (CH<sub>2</sub> Cys).

### **1-O-(2,3-bis-O-(4-methoxybenzyl)-5-O-((tert-butyl)-diphenylsilyl)-α-D-ribose)-N-fluorenylmethoxycarbonyl serine allyl ester (12)**

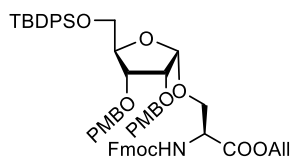

1-O-((N-phenyl)-2,2,2-trifluoroacetimido) 2,3-bis-O-(4-methoxybenzyl)-5-O-((tert-butyl)-diphenylsilyl)-α,β-D-ribofuranoside **10** (1.60 gram, 2.00 mmol, 1.1 eq.) and Fmoc-Ser-OAll **13** (669 mg, 1.82 mmol, 1.0 eq. relative to the donor) were co-evaporated thrice with toluene and dissolved in DCM (20 mL, 0.1M relative to the donor). The reaction was cooled to -50 °C and TBSOTf (46 μL, 0.2 mmol, 0.1 eq. relative to the donor) was added. The reaction was stirred at -50 °C for 4.5 hours before TLC analysis showed near full conversion of the starting material into a higher running product. The reaction was quenched with TEA and evaporated *in vacuo*. Flash column chromatography (0.5 -> 3% acetone in DCM) yielded titled compound as a clear oil (994 mg, 1.02 mmol, 56%). **Rf**: 0.60 (3% acetone in DCM). <sup>1</sup>H NMR (400 MHz, CDCl<sub>3</sub>) δ 7.72 – 7.65 (m, 2H, Fmoc arom.), 7.65 – 7.49 (m, 6H, Fmoc arom. + TBDPS arom.), 7.46 – 7.10 (m, 14H, Fmoc arom. + TBDPS arom. + PMB arom. + CHCl<sub>3</sub> overlap), 6.89 – 6.74 (m, 4H, PMB arom.), 6.61 (d, J = 9.0 Hz, 1H, NH), 5.88 (ddt, J = 16.1, 10.8, 5.5 Hz, 1H, CHCHCH<sub>2</sub>), 5.31 (dd, J = 17.2, 1.6 Hz, 1H, CH<sub>2</sub>CHCH<sub>2a</sub>), 5.16 (dd, J = 10.5, 1.5 Hz, 1H, CH<sub>2</sub>CHCH<sub>2b</sub>), 4.98 (d, J = 4.1 Hz, 1H, H-1), 4.73 – 4.46 (m, 7H, CH Ser + CH<sub>2</sub>CHCH<sub>2</sub> + 2x CH<sub>2</sub> PMB), 4.39 (dd, J = 10.5, 6.9 Hz, 1H, CH<sub>2a</sub> Fmoc), 4.28 – 4.15 (m, 3H, H-4 + CH<sub>2b</sub> Fmoc + CH<sub>2a</sub> Ser), 4.12 (t, J = 7.3 Hz, 1H, CH Fmoc), 4.03 (dd, J = 6.1, 2.3 Hz, 1H, H-3), 3.97 (dd, J = 10.3, 3.3 Hz, 1H, CH<sub>2b</sub> Ser), 3.89 (dd, J = 6.1, 4.1 Hz, 1H, H-2), 3.74 (s, 3H, CH<sub>3</sub> PMB), 3.69 (s, 3H, CH<sub>3</sub> PMB), 3.61 (ddd, J = 38.2, 11.3, 3.2 Hz, 2H, H-5), 0.97 (s, 9H, tBu TBDPS). <sup>13</sup>C NMR (101 MHz, CDCl<sub>3</sub>) δ 170.3 (C=O COOAll), 159.4, 159.1 (Cq PMB), 156.5 (C=O Fmoc), 144.1,

143.8, 141.2, 141.1 (Cq Fmoc), 135.6, 135.5 (CH arom. TBDPS), 133.1, 132.9 (Cq TBDPS), 131.8 (CH<sub>2</sub>CHCH<sub>2</sub>), 130.3 (Cq PMB), 129.9 (CH arom.), 129.8 (Cq PMB), 129.8, 129.7, 129.5, 127.8, 127.8, 127.6, 127.5, 127.0, 127.0, 125.4, 125.1 (CH arom.), 119.9, 119.8 (CH arom. Fmoc), 118.3 (CH<sub>2</sub>CHCH<sub>2</sub>), 113.8, 113.7 (CH arom. PMB), 101.0 (C-1), 84.1 (C-4), 78.6 (C-2), 75.2 (C-3), 72.3, 72.1 (CH<sub>2</sub> PMB), 67.3 (CH<sub>2</sub> Ser), 67.0 (CH<sub>2</sub> Fmoc), 66.0 (CH<sub>2</sub>CHCH<sub>2</sub>), 64.0 (C-5), 55.2, 55.1 (CH<sub>3</sub>PMB), 54.5 (CH Ser), 47.1 (CH Fmoc), 26.8 (CH<sub>3</sub> tBu), 19.2 (Cq tBu). **HRMS:** [C<sub>58</sub>H<sub>63</sub>NO<sub>11</sub>Si + Na]<sup>+</sup> found: 1000.4053, calculated: 1000.4063

**1-O-(2,3-bis-O-(4-methoxybenzyl)-5-O-((tert-butyl)-diphenylsilyl)-α-D-ribose)-N-fluorenylmethoxycarbonyl threonine allyl ester (16)**

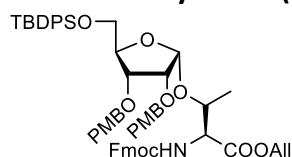

1-O-((N-phenyl)-2,2,2-trifluoroacetimido) 2,3-bis-O-(4-methoxybenzyl)-5-O-((tert-butyl)-diphenylsilyl)-α,β-D-ribofuranoside **10** (1.22 gram, 1.53 mmol, 1.3 eq.) and Fmoc-Thr-OAll **14** (450 mg, 1.18 mmol, 1.0 eq. relative to the donor) were co-evaporated thrice

with toluene and dissolved in DCM (15 mL, 0.1M relative to the donor). The reaction was cooled to -50 °C and TBSOTf (35 μL, 0.15 mmol, 0.1 eq. relative to the donor) was added. The reaction was stirred at -50 °C for 2 hours before TLC analysis showed near full conversion of the starting material into a higher running product. The reaction was quenched with TEA and evaporated *in vacuo*. Flash column chromatography (0.5 → 3% acetone in DCM) yielded titled compound as a clear oil (742 mg, 0.748 mmol, 63%). **Rf:** 0.57 (3% acetone in DCM). **<sup>1</sup>H NMR** (400 MHz, CDCl<sub>3</sub>) δ 7.70 (d, *J* = 7.5 Hz, 2H, Fmoc arom.), 7.67 – 7.52 (m, 6H, Fmoc arom. + TBDPS arom.), 7.46 – 7.28 (m, 10H, Fmoc arom. + TBDPS arom.), 7.28 – 7.15 (m, 4H, PMB arom.), 6.91 – 6.75 (m, 4H, PMB arom.), 6.62 (d, *J* = 8.7 Hz, 1H, NH), 5.88 (ddt, *J* = 17.3, 10.5, 5.7 Hz, 1H, OCH<sub>2</sub>CHCH<sub>2</sub>), 5.37 – 5.26 (m, 1H, OCH<sub>2</sub>CHCH<sub>2a</sub>), 5.21 – 5.15 (m, 1H, OCH<sub>2</sub>CHCH<sub>2b</sub>), 5.13 (d, *J* = 4.2 Hz, 1H, H-1), 4.71 – 4.55 (m, 4H, OCH<sub>2</sub>CHCH<sub>2</sub> + CH<sub>2</sub> PMB), 4.55 – 4.36 (m, 5H CH<sub>2</sub> PMB + CH<sub>2a</sub> Fmoc + 2x CH Thr), 4.30 (dd, *J* = 10.3, 7.6 Hz, 1H, CH<sub>2b</sub> Fmoc), 4.23 (t, *J* = 7.3 Hz, 1H, CH Fmoc), 4.18 (q, *J* = 3.3 Hz, 1H, H-4), 3.95 (dd, *J* = 6.6, 3.0 Hz, 1H, H-3), 3.82 (dd, *J* = 6.6, 4.2 Hz, 1H, H-2), 3.76 – 3.61 (m, 7H, 2x CH<sub>3</sub> PMB + H-5<sub>a</sub>), 3.55 (dd, *J* = 11.3, 3.4 Hz, 1H, H-5<sub>b</sub>), 1.40 (d, *J* = 6.3 Hz, 3H, CH<sub>3</sub> Thr), 0.97 (s, 9H, tBu TBDPS). **<sup>13</sup>C NMR** (101 MHz, CDCl<sub>3</sub>) δ 170.7 (C=O, COOAll), 159.3, 159.1 (Cq PMB), 157.0 (C=O Fmoc), 144.0, 143.8, 141.2, 141.1 (Cq Fmoc), 135.5, 135.5 (CH arom. TBDPS), 133.1, 132.9 (Cq TBDPS), 131.6 (OCH<sub>2</sub>CHCH<sub>2</sub>), 130.1 (Cq PMB), 129.8, 129.7 (CH arom.), 129.6 (Cq PMB), 129.5, 129.4, 127.7, 127.7, 127.6, 127.5, 127.0, 127.0, 125.3, 125.2 (CH arom.), 119.8 (CH arom. Fmoc), 118.7 (OCH<sub>2</sub>CHCH<sub>2</sub>), 113.8, 113.7 (CH arom. PMB), 101.4 (C-1), 83.6 (C-4), 77.8 (C-2), 74.8 (C-3), 74.4 (RO-CH(CH<sub>3</sub>)CH-R Thr), 72.0, 71.8 (CH<sub>2</sub> PMB), 67.1 (CH<sub>2</sub> Fmoc), 65.9 (OCH<sub>2</sub>CHCH<sub>2</sub>), 63.9 (C-5), 59.4 (RO-CH(CH<sub>3</sub>)CH-R Thr), 55.1, 55.0 (CH<sub>3</sub> PMB), 47.1 (CH Fmoc), 26.7 (CH<sub>3</sub> tBu), 19.1 (Cq tBu), 19.1 (CH<sub>3</sub> Thr). **HRMS:** [C<sub>59</sub>H<sub>65</sub>NO<sub>11</sub>Si + H]<sup>+</sup> found: 992.4402, calculated: 992.4400.

**1-O-(2,3-bis-O-(4-methoxybenzyl)-5-O-((tert-butyl)-diphenylsilyl)-α-D-ribose)-N-fluorenylmethoxycarbonyl cysteine allyl ester (17)**

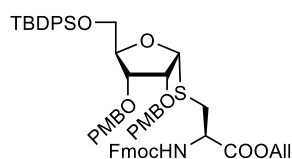

1-O-((N-phenyl)-2,2,2-trifluoroacetimido) 2,3-bis-O-(4-methoxybenzyl)-5-O-((tert-butyl)-diphenylsilyl)-α,β-D-ribofuranoside **10** (1.60 gram, 2.00 mmol, 1.3 eq.) and Fmoc-Cys-OAll **15** (595 mg, 1.55 mmol, 1.0 eq. relative to the donor) were co-evaporated thrice

with toluene and dissolved in DCM (20 mL, 0.1M relative to the donor). The reaction was cooled to -50 °C and TBSOTf (46 μL, 0.2 mmol, 0.1 eq. relative to the

donor) was added. The reaction was stirred at  $-50\text{ }^{\circ}\text{C}$  for 1.5 hours before TLC analysis showed near full conversion of the starting material into a higher running product. The reaction was quenched with TEA and evaporated *in vacuo*. Flash column chromatography (0.5  $\rightarrow$  1.5% acetone in DCM) yielded titled compound as a clear oil (1.08 gram, 1.08 mmol, 70%). **Rf**: 0.65 (1.5% acetone in DCM).  **$^1\text{H NMR}$**  (400 MHz,  $\text{CDCl}_3$ )  $\delta$  7.73 – 7.62 (m, 2H, Fmoc arom.), 7.62 – 7.43 (m, 6H, Fmoc arom. + TBDPS arom.), 7.42 – 7.06 (m, 14H, Fmoc arom. + TBDPS arom. + PMB arom.), 6.90 – 6.77 (m, 4H, PMB arom.), 6.67 (d,  $J = 8.8$  Hz, 1H, NH), 5.87 (ddt,  $J = 16.3, 10.8, 5.7$  Hz, 1H,  $\text{OCH}_2\text{CHCH}_2$ ), 5.39 (d,  $J = 5.5$  Hz, 1H, H-1), 5.28 (dq,  $J = 17.2, 1.5$  Hz, 1H,  $\text{OCH}_2\text{CHCH}_{2a}$ ), 5.15 (dd,  $J = 10.4, 1.4$  Hz, 1H,  $\text{OCH}_2\text{CHCH}_{2b}$ ), 4.77 (dt,  $J = 8.9, 4.4$  Hz, 1H, CH Cys), 4.72 – 4.53 (m, 5H,  $\text{OCH}_2\text{CHCH}_2 + 1x\text{ CH}_2\text{ PMB} + 1x\text{ CH}_{2a}\text{ PMB}$ ), 4.47 (d,  $J = 11.8$  Hz, 1H,  $\text{CH}_{2b}\text{ PMB}$ ), 4.42 – 4.26 (m, 2H, H-4 +  $\text{CH}_{2a}$  Fmoc), 4.21 – 3.97 (m, 4H, H-2 + H-3 +  $\text{CH}_{2b}$  Fmoc + CH fmoc), 3.77 (dd,  $J = 11.4, 3.3$  Hz, 1H, H-5<sub>a</sub>), 3.74 – 3.70 (m, 6H, 2x  $\text{CH}_3$  PMB), 3.66 (dd,  $J = 11.3, 2.9$  Hz, 1H, H-5<sub>b</sub>), 3.44 (dd,  $J = 14.6, 5.0$  Hz, 1H,  $\text{CH}_{2a}$  Cys), 2.95 (dd,  $J = 14.6, 3.9$  Hz, 1H,  $\text{CH}_{2b}$  Cys), 0.96 (s, 9H, *t*Bu TBDPS).  **$^{13}\text{C NMR}$**  (101 MHz,  $\text{CDCl}_3$ )  $\delta$  170.2 (C=O COOAll), 159.3, 159.1 (Cq PMB), 156.1 (C=O Fmoc), 143.9, 143.7, 141.1, 141.0 (Cq Fmoc), 135.4, 135.4 (CH arom. TBDPS), 132.9, 132.8 (Cq TBDPS), 131.6 ( $\text{OCH}_2\text{CHCH}_2$ ), 130.0 (Cq PMB), 129.7, 129.6, 129.5 (CH arom.), 129.4 (Cq PMB), 129.2, 127.7, 127.6, 127.6, 127.5, 127.5, 126.9, 126.9, 125.2, 125.0 (CH arom.), 119.7 (CH arom. Fmoc) 118.5 ( $\text{OCH}_2\text{CHCH}_2$ ), 113.7, 113.6 (CH arom. PMB), 89.1 (C-1), 82.6 (C-4), 78.0 (C-2), 76.0 (C-3), 72.5, 72.0 ( $\text{CH}_2$  PMB), 66.9 ( $\text{CH}_2$  Fmoc), 65.9 ( $\text{OCH}_2\text{CHCH}_2$ ), 63.3 (C-5), 55.1 ( $\text{CH}_3$  PMB), 54.2 (CH Cys), 46.9 (CH Fmoc), 34.8 ( $\text{CH}_2$  Cys), 26.7 ( $\text{CH}_3$  *t*Bu), 19.1 (Cq *t*Bu). **HRMS**:  $[\text{C}_{58}\text{H}_{63}\text{NO}_{10}\text{SSi} + \text{H}]^+$  found: 994.4017, calculated: 994.4015.

**1-O-( 2,3-bis-O-(4-methoxybenzyl)-5-O-((tert-butyl)-diphenylsilyl)- $\alpha$ -D-riboseyl)-N-fluorenylmethoxycarbonyl serine (1)**

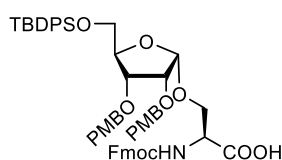

1-O-( 2,3-bis-O-(4-methoxybenzyl)-5-O-((tert-butyl)-diphenylsilyl)- $\alpha$ -D-riboseyl)-N-fluorenylmethoxycarbonyl

serine allyl ester **12** (836 mg, 0.855 mmol, 1.0 eq.) was dissolved in DCM (8.5 mL, 0.1M). DMBA (265 mg, 1.70 mmol, 2.0 eq.) and  $\text{Pd}(\text{PPh}_3)_4$  (10 mg, 8.5  $\mu\text{mol}$ , 0.01 eq.) were added and the reaction

was stirred for 1 hour before TLC showed full conversion of the starting material into a lower running product. The reaction was diluted with DCM, washed with 1M HCl and the organics were dried over  $\text{MgSO}_4$ , filtered and concentrated *in vacuo*. Flash column chromatography in (4% MeOH in DCM + 0.1% AcOH) yielded titled compound as a white foam (724 mg, 0.772 mmol, 90%). **Rf**: 0.38 (5% MeOH in DCM + 0.1% AcOH).  $[\alpha]_{\text{D}}^{20} = +50.8^{\circ}$  ( $c = 1.0, \text{CHCl}_3$ ).  **$^1\text{H NMR}$**  (400 MHz,  $\text{CDCl}_3$ )  $\delta$  7.70 (d,  $J = 7.6$  Hz, 2H, Fmoc arom.), 7.61 – 7.49 (m, 6H, Fmoc arom. + TBDPS arom.), 7.49 – 7.13 (m, 14H, Fmoc arom. + TBDPS arom. + PMB arom.), 6.86 – 6.72 (m, 4H, PMB arom.), 6.27 – 6.18 (m, 1H, NH), 4.93 (d,  $J = 4.1$  Hz, 1H, H-1), 4.62 – 4.44 (m, 5H, CH Ser + 2x  $\text{CH}_2$  PMB), 4.42 – 4.26 (m, 2H,  $\text{CH}_2$  Fmoc), 4.20 – 4.09 (m, 2H, H-4 + CH Fmoc), 4.06 – 3.99 (m, 1H,  $\text{CH}_{2a}$  Ser), 3.97 (dd,  $J = 6.1, 1.6$  Hz, 1H, H-3), 3.94 – 3.85 (m, 2H,  $\text{CH}_{2b}$  Ser + H-2), 3.79 – 3.69 (m, 6H, 2x  $\text{CH}_3$  PMB), 3.56 (dd,  $J = 11.3, 3.5$  Hz, 1H, H-5<sub>a</sub>), 3.44 (dd,  $J = 11.3, 2.8$  Hz, 1H, H-5<sub>b</sub>), 0.95 (s, 9H, *t*Bu TBDPS).  **$^{13}\text{C NMR}$**  (101 MHz,  $\text{CDCl}_3$ )  $\delta$  172.0 (C=O COOH), 159.6, 159.4 (Cq PMB), 156.4 (C=O Fmoc), 141.4, 141.3 (Cq Fmoc), 135.7, 135.6 (CH arom. TBDPS), 133.1, 132.8 (Cq TBDPS), 130.1, 130.0, 130.0, 129.9 (CH arom.), 129.7, 129.2 (Cq PMB), 127.9, 127.9, 127.8, 127.2, 125.3, 125.2 (CH arom.), 120.0 (CH arom. Fmoc), 114.1, 113.9 (CH arom. PMB), 101.5 (C-1), 84.6 (C-4), 78.2 (C-2), 74.9 (C-3), 72.3 ( $\text{CH}_2$  PMB), 67.2 ( $\text{CH}_2$  Fmoc), 66.7 ( $\text{CH}_2$



Ser), 64.1 (C-5), 55.3 (CH<sub>3</sub> PMB), 53.6 (CH Ser), 47.2 (CH Fmoc), 26.9 (CH<sub>3</sub> tBu), 19.3 (Cq tBu).  
**HRMS:** [C<sub>55</sub>H<sub>59</sub>NO<sub>11</sub>Si + Na]<sup>+</sup> found: 960.3756, calculated: 960.3750.

**1-O-( 2,3-bis-O-(4-methoxybenzyl)-5-O-((tert-butyl)-diphenylsilyl)- $\alpha$ -D-ribose)-N-fluorenylmethoxycarbonyl threonine (2)**

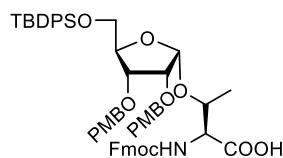

1-O-( 2,3-bis-O-(4-methoxybenzyl)-5-O-((tert-butyl)-diphenylsilyl)- $\alpha$ -D-ribose)-N-fluorenylmethoxycarbonyl threonine allyl ester **16** (525 mg, 0.529 mmol, 1.0 eq.) was dissolved in DCM (5.3 mL, 0.1M). DMBA (372 mg, 2.38 mmol, 4.5 eq.) and a catalytic amount of Pd(PPh<sub>3</sub>)<sub>4</sub> were added and the reaction was stirred for 15 minutes before TLC showed full conversion of the starting material into a lower running product. The reaction was diluted with DCM, washed with sat. aq. NaHCO<sub>3</sub>. The water layer was extracted six times with DCM. The combined organics were dried over MgSO<sub>4</sub>, filtered and concentrated *in vacuo*. After purification by flash column chromatography in (1 > 10% MeOH in DCM) all fractions containing titled compound were combined and concentrated *in vacuo*. The residue was taken up in DCM and washed with 10% aqueous citric acid. The water layer was extracted twice with DCM and the combined organics were dried over MgSO<sub>4</sub>, filtered and evaporated *in vacuo* yielding titled compound as an off-white foam (495 mg, 0.520 mmol, 98%). **Rf:** 0.05 (25% EtOAc in pentane + 0.1% AcOH).  $[\alpha]_D^{20} = +43.2^\circ$  (c = 1.0, CHCl<sub>3</sub>). **<sup>1</sup>H NMR** (400 MHz, CDCl<sub>3</sub>)  $\delta$  7.74 (d, *J* = 7.2 Hz, 2H, Fmoc arom.), 7.64 – 7.55 (m, 6H, Fmoc arom. + TBDPS arom.), 7.49 – 7.32 (m, 10H, Fmoc arom. + TBDPS arom.), 7.28 (tt, *J* = 7.5, 1.4 Hz, 4H, Fmoc arom. + TBDPS arom.), 7.22 (t, *J* = 8.3 Hz, 4H, PMB arom.), 6.86 – 6.74 (m, 4H, PMB arom.), 6.13 (d, *J* = 6.7 Hz, 1H, NH), 5.20 (d, *J* = 4.1 Hz, 1H, H-1), 4.58 – 4.47 (m, 5H, 2x CH<sub>2</sub> PMB + CH Thr), 4.42 – 4.33 (m, 2H, CH<sub>2</sub> Fmoc), 4.26 (dd, *J* = 6.6, 4.4 Hz, 1H, CH Thr), 4.24 – 4.16 (m, 2H, CH Fmoc + H-4), 3.95 (dd, *J* = 6.4, 1.9 Hz, 1H, H-3), 3.89 (dd, *J* = 6.3, 4.2 Hz, 1H, H-2), 3.75 (s, 3H, CH<sub>3</sub> PMB), 3.71 (s, 3H, CH<sub>3</sub> PMB), 3.64 – 3.57 (m, 1H, H-5<sub>a</sub>), 3.51 (dd, *J* = 11.3, 3.0 Hz, 1H, H-5<sub>b</sub>), 1.27 (d, *J* = 6.5 Hz, 3H, CH<sub>3</sub> Thr), 0.97 (s, 9H, tBu TBDPS). **<sup>13</sup>C NMR** (101 MHz, CDCl<sub>3</sub>)  $\delta$  171.4 (C=O COOH), 159.6, 159.3 (Cq PMB), 156.1 (C=O Fmoc), 143.9, 143.7, 141.3, 41.3 (Cq Fmoc), 135.6, 135.6 (CH arom. TBDPS), 133.1, 132.8 (Cq TBDPS), 129.9, 129.9, 129.8, 129.6 (CH arom.), 128.9 (Cq PMB), 127.8, 127.8, 127.8, 127.1, 125.2 (CH arom.), 120.0, 120.0 (CH arom. Fmoc), 114.0, 113.8 (CH arom. PMB), 103.1 (C-1), 84.7 (C-4), 78.0 (C-2), 74.9 (CH Thr), 74.5 (C-3), 72.2, 72.1 (CH<sub>2</sub> PMB), 67.2 (CH<sub>2</sub> Fmoc), 64.1 (C-5), 57.8 (CH Thr), 55.3, 55.2 (CH<sub>3</sub> PMB), 47.2 (CH Fmoc), 26.8 (CH<sub>3</sub> tBu), 19.2 (Cq tBu), 16.9 (CH<sub>3</sub> Thr). **HRMS:** [C<sub>56</sub>H<sub>61</sub>NO<sub>11</sub>Si + Na]<sup>+</sup> found: 974.3910, calculated: 974.3906.

**1-O-( 2,3-bis-O-(4-methoxybenzyl)-5-O-((tert-butyl)-diphenylsilyl)- $\alpha$ -D-ribose)-N-fluorenylmethoxycarbonyl cysteine (3)**

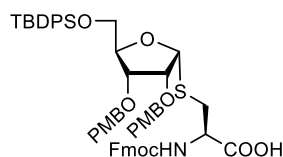

1-O-( 2,3-bis-O-(4-methoxybenzyl)-5-O-((tert-butyl)-diphenylsilyl)- $\alpha$ -D-ribose)-N-fluorenylmethoxycarbonyl cysteine allyl ester **17** (1.08 gram, 1.09 mmol, 1.0 eq.) was dissolved in DCM (11 mL, 0.1M). DMBA (775 mg, 4.95 mmol, 4.5 eq.) and a catalytic amount of Pd(PPh<sub>3</sub>)<sub>4</sub> were added and the reaction was stirred for 15 minutes before TLC showed full conversion of the starting material into a lower running product. The reaction was diluted with DCM, washed with sat. aq. NaHCO<sub>3</sub>. The water layer was extracted six times with DCM. The combined organics were dried over MgSO<sub>4</sub>, filtered

and concentrated *in vacuo*. After purification by flash column chromatography (0.5 → 5% MeOH in DCM) all fractions containing titled compound were combined and concentrated *in vacuo*. The residue was taken up in DCM and washed with 10% aqueous citric acid. The water layer was extracted twice with DCM and the combined organics were dried over MgSO<sub>4</sub>, filtered and evaporated *in vacuo* yielding titled compound as an off-white foam (943 mg, 0.988 mmol, 91%). **Rf**: 0.10 (25% EtOAc in pentane + 0.1% AcOH).  $[\alpha]_{\text{D}}^{20} = +62.8^\circ$  (c = 1.0, CHCl<sub>3</sub>). **<sup>1</sup>H NMR** (400 MHz, CDCl<sub>3</sub>) δ 7.67 (d, *J* = 7.7 Hz, 2H, Fmoc arom.), 7.58 – 7.45 (m, 6H, Fmoc arom. + TBDPS arom.), 7.40 – 7.09 (m, 14H, Fmoc arom. + TBDPS arom. + PMB arom.), 6.81 (t, *J* = 8.3 Hz, 4H, PMB arom.), 6.59 (d, *J* = 8.3 Hz, 1H, NH), 5.40 (d, *J* = 5.4 Hz, 1H, H-1), 4.75 – 4.42 (m, 5H, CH Cys + 2x CH<sub>2</sub> PMB), 4.39 – 4.24 (m, 2H, H-4 + CH<sub>2a</sub> Fmoc), 4.20 – 3.96 (m, 4H, CH<sub>2b</sub> Fmoc + H-2 + H-3 + CH Fmoc), 3.81 – 3.67 (m, 7H, 2x CH<sub>3</sub> PMB + H-5<sub>a</sub>), 3.60 (dd, *J* = 11.5, 2.9 Hz, 1H, H-5<sub>b</sub>), 3.46 – 3.36 (m, 1H, CH<sub>2a</sub> Cys), 2.96 (dd, *J* = 14.3, 4.0 Hz, 1H, CH<sub>2b</sub> Cys), 0.93 (s, 9H, *t*Bu TBDPS). **<sup>13</sup>C NMR** (101 MHz, CDCl<sub>3</sub>) δ 176.4 (C=O COOH), 159.4, 159.2 (Cq PMB), 156.5 (C=O Fmoc), 143.9, 143.8, 141.2 (Cq Fmoc), 135.6, 135.5 (CH arom. TBDPS), 133.1, 133.0 (Cq TBDPS), 130.1 (Cq PMB), 129.8, 129.8 (CH arom.), 129.6 (Cq PMB), 129.5, 127.7, 127.7, 127.6, 127.1, 127.1, 125.3, 125.2 (CH arom.), 119.9 (CH arom. Fmoc), 113.9, 113.8 (CH arom. PMB), 89.4 (C-1), 82.7 (C-4), 78.1 (C-2), 76.1 (C-3), 72.7, 72.2 (CH<sub>2</sub> PMB), 67.2 (CH<sub>2</sub> Fmoc), 63.4 (C-5), 55.3 (CH<sub>3</sub> PMB), 54.3 (CH Cys), 47.0 (CH Fmoc), 34.5 (CH<sub>2</sub> Cys), 26.8 (CH<sub>3</sub> *t*Bu), 19.2 (Cq *t*Bu). **HRMS**: [C<sub>55</sub>H<sub>59</sub>NO<sub>10</sub>SSi + Na]<sup>+</sup> found: 976.3520, calculated: 976.3521.

### 2',3',5'-tri-*O*-*tert*-butyldimethylsilyl adenosine (S7)

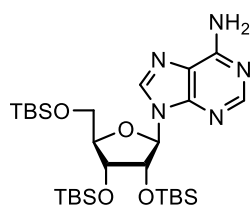

Adenosine (2.67 g, 10.0 mmol) was co-evaporated thrice with anhydrous pyridine (3 x 10 mL), dissolved in anhydrous dimethylformamide (20 mL, 0.2M) and heated to 50 °C, whereupon imidazole (3.40 g, 50.0 mmol, 5.0 eq.) and *tert*-butyldimethylsilyl chloride (50 wt. % in toluene, 12.2 mL, 35.0 mmol, 3.5 eq.) were added consecutively. After stirring overnight, excess silyl chloride was quenched by the addition of H<sub>2</sub>O (10 mL), the mixture diluted with Et<sub>2</sub>O (100 mL) and washed once with H<sub>2</sub>O (100 mL). The aqueous layer was back-extracted twice with Et<sub>2</sub>O (2 x 100 mL) and the resulting organic layers combined, washed with sat. aq. NaCl (100 mL), dried over MgSO<sub>4</sub>, filtered and concentrated *in vacuo*. Purification by column chromatography (20 → 30% EtOAc in toluene) afforded titled compound as a crystalline white solid (6.11 g, 10.0 mmol, quant.). Spectral data was in accordance with literary precedence.<sup>[10]</sup> **Rf**: 0.19 (20% EtOAc in toluene). **<sup>1</sup>H NMR** (400 MHz, CDCl<sub>3</sub>): δ 8.35 (s, 1H, H-2), 8.18 (s, 1H, H-8), 6.30 (s, 2H, 6-NH<sub>2</sub>), 6.05 (d, 1H, *J* = 5.2 Hz, H-1'), 4.70 (dd, 1H, *J* = 5.1, 4.3 Hz, H-2'), 4.33 (app. t, 1H, *J* = 3.9 Hz, H-3'), 4.14 (td, 1H, *J* = 3.9, 2.8 Hz, H-4'), 4.05 (dd, 1H, *J* = 11.3, 4.2 Hz, H-5'), 3.80 (dd, 1H, *J* = 11.3, 2.9 Hz, H-5'), 0.96 (s, 9H, CH<sub>3</sub> *t*Bu), 0.94 (s, 9H, CH<sub>3</sub> *t*Bu), 0.81 (s, 9H, CH<sub>3</sub> *t*Bu), 0.16 – 0.13 (m, 6H, CH<sub>3</sub> SiMe), 0.12 – 0.10 (m, 6H, CH<sub>3</sub> SiMe), -0.03 (s, 3H, CH<sub>3</sub> SiMe), -0.21 (s, 3H, CH<sub>3</sub> SiMe). **<sup>13</sup>C NMR** (101 MHz, CDCl<sub>3</sub>): δ 155.8 (C-6), 153.0 (C-2), 150.0 (C-4), 139.7 (C-8), 120.1 (C-5), 88.4 (C-1'), 85.5 (C-4'), 75.9 (C-2'), 72.1 (C-3'), 62.6 (C-5'), 26.2, 26.0, 25.8 (*t*Bu TBS), 18.6, 18.2, 18.0 (Cq *t*Bu), -4.3, -4.6, -4.6, -5.0, -5.3 (SiMe).

### ***N*<sup>6</sup>-*tert*-butyloxycarbonyl-2',3',5'-tri-*O*-*tert*-butyldimethylsilyl adenosine (**S8**)**

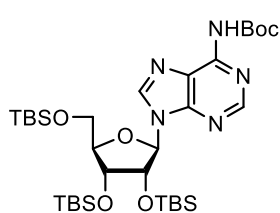

Persilylated adenosine **S7** (5.40 g, 8.86 mmol) was co-evaporated thrice with anhydrous 1,4-dioxane (3 x 10 mL), dissolved in anhydrous tetrahydrofuran (89 mL, 0.1 M) and cooled to 0 °C, whereupon DMAP (217 mg, 1.77 mmol, 0.2 eq.) and di-*tert*-butyl dicarbonate (6.1 mL, 26.6 mmol, 3.0 eq.) were added consecutively. The mixture was heated to reflux and stirred for 2.5 hours, whereafter it was cooled to room temperature and concentrated to dryness. The residue was partitioned between EtOAc (100 mL) and sat. aq. NaCl (100 mL) and the organic layer dried over MgSO<sub>4</sub>, filtered and evaporated *in vacuo*. The preceding red oil was redissolved in methanol (89 mL, 0.1 M) and cooled in an ice bath, whereupon methylamine (33 wt. % in EtOH, 3.3 mL, 35.4 mmol, 4.0 eq.) was added. After stirring overnight while gradually warming to ambient temperature, the resulting solution was concentrated *in vacuo*. Flash column chromatography (0 → 30% EtOAc in pentane) furnished titled compound as a crystalline white solid (6.29 g, 8.66 mmol, quant.). Spectral data was in accordance with literary precedence.<sup>[10]</sup> **Rf**: 0.84 (20% EtOAc in toluene). **<sup>1</sup>H NMR** (400 MHz, CDCl<sub>3</sub>): δ 8.74 (s, 1H, H-2), 8.33 (s, 1H, H-8), 8.22 (s, 1H, 6-NH), 6.09 (d, 1H, *J* = 5.3 Hz, H-1'), 4.65 (dd, 1H, *J* = 5.3, 4.3 Hz, H-2'), 4.29 (dd, 1H, *J* = 4.3, 3.4 Hz, H-3'), 4.14 (app. q, 1H, *J* = 3.5 Hz, H-4'), 4.02 (dd, 1H, *J* = 11.4, 3.9 Hz, H-5'), 3.80 (dd, 1H, *J* = 11.4, 2.7 Hz, H-5'), 1.55 (s, 9H, CH<sub>3</sub> *t*Bu Boc), 0.96 (s, 9H, CH<sub>3</sub> *t*Bu), 0.93 (s, 9H, CH<sub>3</sub> *t*Bu), 0.78 (s, 9H, CH<sub>3</sub> *t*Bu), 0.15 (s, 3H, CH<sub>3</sub> SiMe), 0.13 (s, 3H, CH<sub>3</sub> SiMe), 0.10 – 0.09 (m, 6H, CH<sub>3</sub> SiMe), -0.06 (s, 3H, CH<sub>3</sub> SiMe), -0.29 (s, 3H, CH<sub>3</sub> SiMe); **<sup>13</sup>C-APT NMR** (101 MHz, CDCl<sub>3</sub>, HSQC, HMBC): δ 153.0 (C-2), 150.9 (C-6), 149.9 (C-4), 149.8 (C=O), 141.4 (C-8), 122.1 (C-5), 88.4 (C-2'), 85.8 (C-3'), 82.2 (Cq *t*Bu Boc), 76.2 (C-1'), 72.1 (C-4'), 62.7 (C-5'), 28.2 (*t*Bu Boc), 26.1, 25.9, 25.7 (*t*Bu TBS), 18.6, 18.1, 17.9 (Cq *t*Bu), -4.4, -4.6, -4.6, -5.1, -5.3, -5.3 (SiMe).

### ***N*<sup>6</sup>-*tert*-butyloxycarbonyl-2',3'-di-*O*-*tert*-butyldimethylsilyl adenosine (**18**)**

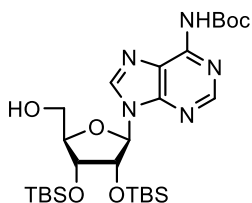

To an ice-cooled solution of *N*<sup>6</sup>-*tert*-butyloxycarbonyl-2',3',5'-tri-*O*-*tert*-butyldimethylsilyl adenosine **S8** (6.29 g, 8.86 mmol) in tetrahydrofuran (89 mL, 0.1 M), a freshly prepared TFA/H<sub>2</sub>O mixture (1/1; v/v, 65.8 mL, 50 eq.) was gradually added. After stirring for 4.5 hours at 0 °C, the solution was quenched by the careful addition of solid NaHCO<sub>3</sub> until pH ~ 7, diluted with sat. aq. NaHCO<sub>3</sub> (300 mL) and extracted thrice with EtOAc (3 x 200 mL). The resulting organic layers were combined, dried over MgSO<sub>4</sub> filtered and concentrated *in vacuo*. Flash column chromatography (30% → 50% EtOAc in pentane) furnished titled compound as a crystalline white foam (4.98 g, 8.36 mmol, 94%). Spectral data was in accordance with literary precedence.<sup>[10]</sup> **Rf**: 0.79 (50% EtOAc in pentane). **<sup>1</sup>H NMR** (400 MHz, CDCl<sub>3</sub>): δ 8.75 (s, 1H, H-2), 8.32 (s, 1H, 6-NH), 7.99 (s, 1H, H-8), 6.24 (br. s, 1H-5'-OH), 5.83 (d, 1H, *J* = 7.8 Hz, H-1'), 5.03 (dd, 1H, *J* = 7.8, 4.6 Hz, H-2'), 4.34 (d, 1H, *J* = 4.5 Hz, H-3'), 4.18 (d, 1H, *J* = 1.7 Hz, H-4'), 3.96 (dd, 1H, *J* = 13.1, 1.8 Hz, H-5'), 3.73 (d, 1H, *J* = 13.1 Hz, H-5'), 1.57 (s, 9H, CH<sub>3</sub> *t*Bu Boc), 0.95 (s, 9H, CH<sub>3</sub> *t*Bu), 0.73 (s, 9H, CH<sub>3</sub> *t*Bu), 0.14 – 0.12 (m, 6H, CH<sub>3</sub> SiMe), -0.14 (s, 3H, CH<sub>3</sub> SiMe), -0.66 (s, 3H, CH<sub>3</sub> SiMe). **<sup>13</sup>C NMR** (101 MHz, CDCl<sub>3</sub>): δ 152.5 (C-2), 150.8 (C-6), 149.7 (C=O), 149.5 (C-4), 142.9 (C-8), 123.3 (C-5), 91.2 (C-1'), 89.7 (C-4'), 82.6 (Cq *t*Bu Boc), 74.0 (C-2'), 74.0 (C-3'), 63.0 (C-5'), 28.2 (*t*Bu Boc), 25.9, 25.7 (*t*Bu TBS), 18.1, 17.8 (Cq *t*Bu), -4.5, -4.5, -4.6, -5.9 (SiMe).

## 5'-O-(N<sup>6</sup>-tert-butyloxycarbonyl-2',3'-di-O-tert-butylidimethylsilyl)adenosine)-2-cyanoethyl-N,N-diisopropylphosphoramidite (6)

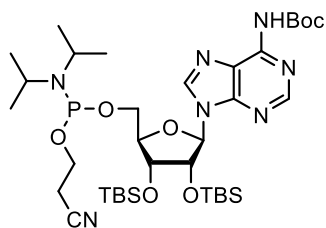

N<sup>6</sup>-tert-butyloxycarbonyl-2',3'-di-O-tert-butylidimethylsilyl adenosine **18** (1.49 g, 2.5 mmol) was co-evaporated thrice with toluene and dissolved in anhydrous DCM (25 mL, 0.1M). DIPEA (1.34 mL, 7.5 mmol, 3.0 eq.) and 2-cyanoethyl-N,N-diisopropylchlorophosphoramidite (0.61 mL, 2.75 mmol, 1.1 eq.) were added to the reaction and after 3 hours TLC indicated full conversion of starting material. The reaction was diluted with DCM and washed with brine. The organic layer was dried over MgSO<sub>4</sub>, filtered and evaporated *in vacuo*. Flash column chromatography (20 → 30% EtOAc in pentane + 1% TEA) afforded titled compound as a white foam and a mixture of diastereomers (*S<sub>P</sub>/R<sub>P</sub>*). (1.77 g, 2.23 mmol, 89%). **Rf**: 0.76 (40% EtOAc in pentane). **<sup>1</sup>H NMR** (400 MHz, CDCl<sub>3</sub>) δ 8.76 – 8.67 (m, 1H, H-2), 8.36 – 8.29 (m, 1H, H-8), 8.03 (s, 1H, 6-NH), 6.04 (dd, *J* = 15.4, 5.3 Hz, 1H, H-1'), 4.86 – 4.67 (m, 1H, H-2'), 4.36 – 4.18 (m, 2H, H-3' + H-4'), 4.12 – 3.75 (m, 4H, H-5' + OCH<sub>2</sub>CH<sub>2</sub>CN), 3.62 (m, 3H, H-5' + 2x RNCH(CH<sub>3</sub>)<sub>2</sub>), 2.68 (m, 2H, OCH<sub>2</sub>CH<sub>2</sub>CN), 1.55 (s, 9H), 1.20 (dq, *J* = 8.5, 3.6, 3.0 Hz, 12H, 2x RNCH(CH<sub>3</sub>)<sub>2</sub>), 0.92 (m, 9H, CH<sub>3</sub> tBu), 0.79 – 0.74 (m, 9H, CH<sub>3</sub> tBu), 0.14 – 0.03 (m, 6H, CH<sub>3</sub> SiMe), -0.02 – -0.14 (m, 3H, CH<sub>3</sub> SiMe), -0.18 – -0.39 (m, 3H, CH<sub>3</sub> SiMe). **<sup>13</sup>C NMR** (101 MHz, CDCl<sub>3</sub>) δ 153.0, 152.9 (C-2), 151.0, 150.8 (C-6), 149.9, 149.9, 149.8 (C=O + C-4), 141.8 (C-8), 122.3, 122.2 (C-5), 117.5, 117.5 (Cq OCE), 89.1, 88.4 (C-1'), 85.2, 85.1, 84.4, 84.3 (C-4'), 82.3, 82.3 (Cq tBu Boc), 75.6, 75.5 (C-2'), 73.0, 72.0 (C-3'), 63.0, 62.8, 62.2, 62.0 (C-5'), 58.8, 58.7, 58.6, 58.5 (OCH<sub>2</sub>CH<sub>2</sub>CN), 43.3, 43.2, 43.2, 43.1 (RNCH(CH<sub>3</sub>)<sub>2</sub>), 28.2 (tBu Boc), 25.9, 25.9, 25.8, 25.8 (tBu TBS), 24.9, 24.9, 24.8, 24.8, 24.7 (RNCH(CH<sub>3</sub>)<sub>2</sub>), 20.5, 20.5, 20.5 (OCH<sub>2</sub>CH<sub>2</sub>CN), 18.2, 18.1, 17.9 (Cq tBu), -4.3, -4.4, -4.6, -4.6, -4.6, -4.9, -5.1 (SiMe). **<sup>31</sup>P NMR** (162 MHz, CDCl<sub>3</sub>) δ 149.8, 149.7. **HRMS**: mass was detected as its corresponding H-phosphonate [C<sub>30</sub>H<sub>53</sub>N<sub>6</sub>O<sub>8</sub>PSi<sub>2</sub> + H]<sup>+</sup> found: 713.3272, calculated: 713.3274.

## Solid phase synthesis

### Peptide synthesis

The intermediate peptides were synthesized using standard, Fmoc-based solid phase peptide synthesis utilizing (pre-loaded) Tentagel® S AC purchased from Rapp Polymer GmbH. Coupling cycles were as followed: Fmoc deprotection: 2x2 min, 1x5 min treatment with 20% piperidine in DMF. Coupling: treatment of 6 eq. amino acid, 6 eq. HCTU (0.25M in DMF) and 12 eq. DIPEA (1M in DMF) for 30 minutes. Capping: 2x2 min treatment of the resin with a 10% Ac<sub>2</sub>O solution in DMF and catalytic DIPEA. Washing between the steps was done with DMF. Ribosylated amino acids **1**, **2** and **3** were incorporated in the sequence by adding a solution of 2 eq. building block in a 0.25M HCTU solution (2 eq.) in DMF and a 1M DIPEA solution (4 eq.) in DMF to the resin in a fritted syringe. The resin was shaken overnight and thoroughly washed.

### On-resin phosphorylation

The resin was treated with a sufficient amount of 1M TBAF in THF for 30 minutes. The resin was thoroughly washed with DCM and DMF before the treatment was repeated once, furnishing the desilylated intermediate. The resin was then extensively washed with MeCN and flushed with nitrogen to remove traces of water before the resin was subjected to a solution of 5 eq. of (FmO)<sub>2</sub>PN(*i*Pr)<sub>2</sub> (0.25M in MeCN) with 10 eq. ETT solution (0.25M in MeCN). The resin was shaken for 30 minutes after which the resin was washed with MeCN. The resin

was then treated with a sufficient amount of CSO solution (0.5M in MeCN) for 30 minutes. The resin was then treated with a 10% DBU solution in DMF (2x 15 minutes) to furnish the crude, immobilized and deprotected phosphoribosylated peptide.

#### *Construction of the pyrophosphates*

The resin was extensively washed with MeCN and flushed with nitrogen to remove traces of water. The resin was then treated with a solution of 5'-O-(N<sup>6</sup>-tert-butyloxycarbonyl-2',3'-di-O-tert-butylidimethylsilyl)adenosine)-2-cyanoethyl-N,N-diisopropylphosphoramidite **6** (3 eq., 0.3M in MeCN) and ETT (6 eq., 0.25M in MeCN) for 30 minutes. The resin was thoroughly washed with MeCN before a sufficient amount of CSO (0.5M in MeCN) was added to the resin and shaken for 30 minutes.

#### *Final deprotection and cleavage*

The resin was then treated with a 10% DBU solution in DMF (2x 10 minutes) to remove the cyano ethyl protecting group. The resin was then treated with a 1M TBAF solution in THF (2x 45 minutes) and washed with DMF followed by DCM. Final cleavage/deprotection occurred by treating the resin with a cleavage cocktail (2.5/10/87.5 TIS/TFA/DCM) for 4 hours. The crude products were collected by filtration and the resin was washed with a solution of 1/1/1 water/tBuOH/MeCN. The solvents were evaporated *in vacuo* and co-evaporated with a 1/1/1 water/tBuOH/MeCN solution.

#### **Ac-Pro-Ala-Lys-Ser(5-O-adenosine diphosphate- $\alpha$ -D-ribosyl)-Ala-Pro-Ala-Pro-Lys-Lys-Gly-OH (24)**

The above described procedures were applied to 25  $\mu$ mol Tentagel<sup>®</sup> S AC resin preloaded with glycine. The amino acids used were: Fmoc-Pro-OH, Fmoc-Ala-OH, Fmoc-Lys(Mtt)-OH and **7**. The crude peptide was purified by RP-HPLC in NH<sub>4</sub>OAc buffer. The pure fractions were concentrated, co-evaporated extensively with a 1:1 mixture of MeCN:Milli-Q water, redissolved in Milli-Q water and lyophilized to obtain titled compound as a white solid (1.49 mg, 0.89  $\mu$ mol, 3.6%). <sup>1</sup>H NMR (850 MHz, D<sub>2</sub>O)  $\delta$  8.48 (s, 1H, H-2 adenine), 8.23 (s, 1H, H-8 adenine), 6.10 (d, J = 6.0 Hz, 1H, H-1' adenosine), 4.94 (d, J = 3.5 Hz, 1H, H-1' ribosyl). <sup>31</sup>P NMR (202 MHz, D<sub>2</sub>O)  $\delta$  -11.21, -11.31, -11.35, -11.46. LC-MS (0  $\rightarrow$  50% B in A): Rt = 3.61. HRMS: [C<sub>64</sub>H<sub>105</sub>N<sub>19</sub>O<sub>27</sub>P<sub>2</sub> + 2H]<sup>2+</sup> found: 817.8522, calculated: 817.8524.

#### **Ac-Gly-Lys-Ser(5-O-adenosine-diphosphate- $\alpha$ -D-ribosyl)-Gly-Ala-Ala-Leu-Ser-Lys-Lys-Gly-OH (25)**

The above described procedures were applied to 50  $\mu$ mol Tentagel<sup>®</sup> S AC resin preloaded with glycine. The amino acids used were: Fmoc-Glyc-OH, Fmoc-Lys(Mtt)-OH, Fmoc-Ala-OH, Fmoc-Leu-OH, Fmoc-Ser(Trt)-OH and **7**. The crude peptide was purified by RP-HPLC in NH<sub>4</sub>OAc buffer. The pure fractions were concentrated, co-evaporated extensively with a 1:1 mixture of MeCN:Milli-Q water, redissolved in Milli-Q water and lyophilized to obtain titled compound as a white solid (8.87 mg, 5.46  $\mu$ mol, 11%). <sup>1</sup>H NMR (500 MHz, D<sub>2</sub>O)  $\delta$  8.50 (s, 1H, H-2 adenine), 8.25 (s, 1H, H-8 adenine), 6.13 (d, J = 5.9 Hz, 1H, H-1' adenosine), 4.99 (d, J = 3.6 Hz, 1H, H-1' ribosyl). <sup>31</sup>P NMR (202 MHz, D<sub>2</sub>O)  $\delta$  -10.5, -10.6, -10.7, -10.8. LC-MS (0  $\rightarrow$  20% B in A): Rt = 8.54. HRMS: [C<sub>59</sub>H<sub>101</sub>N<sub>19</sub>O<sub>28</sub>P<sub>2</sub> + 2H]<sup>2+</sup> found: 793.8334, calculated: 793.8342.

**Ac-Gly-Lys-Ser-(5-O-adenosine-diphosphate- $\alpha$ -D-ribose)-Ser-Gly-Pro-Thr-Ser-Leu-Phe-Ala-Val-Thr-Val-Ala-Pro-Pro-Gly-Ala-Arg-Gly-OH (26)**

The above described procedures were applied to 50  $\mu$ mol Tentagel<sup>®</sup> S AC resin preloaded with glycine. The amino acids used were: Fmoc-Gly-OH, Fmoc-Lys(Mtt)-OH, Fmoc-Ser(Trt)-OH, Fmoc-Pro-OH, Fmoc-Thr(Trt)-OH, Fmoc-Leu-OH, Fmoc-Phe-OH, Fmoc-Ala-OH, Fmoc-Val-OH, Fmoc-Arg(Alloc)<sub>2</sub>-OH and **7**. The Alloc protecting group was removed by treating the resin with a freshly prepared solution of 10 mg Pd(PPh<sub>3</sub>)<sub>4</sub> and 23 mg DMBA in 2.5 mL DCM. This procedure was then repeated twice prior to cleavage and final deprotection of remaining protecting groups. The crude peptide was purified by RP-HPLC in NH<sub>4</sub>OAc buffer. The pure fractions were concentrated, co-evaporated extensively with a 1:1 mixture of MeCN:Milli-Q water, redissolved in Milli-Q water and lyophilized to obtain titled compound as a white solid (7.75 mg, 3.05  $\mu$ mol, 6.1%). **<sup>1</sup>H NMR** (850 MHz, D<sub>2</sub>O)  $\delta$  8.48 (s, 1H, H-2 adenine), 8.22 (s, 1H, H-8 adenine), 7.29 (t, J = 7.5 Hz, 2H, Phe arom.), 7.24 (t, J = 7.4 Hz, 1H, Phe arom.), 7.18 (d, J = 7.4 Hz, 2H, Phe arom.), 6.09 (d, J = 6.0 Hz, 1H, H-1' adenosine), 4.96 (d, J = 3.4 Hz, 1H, H-1' ribosyl). **<sup>31</sup>P NMR** (202 MHz, D<sub>2</sub>O)  $\delta$  -10.51, -10.62, -10.67, -10.77. **LC-MS** (10  $\rightarrow$  90% B in A): Rt = 3.58. **HRMS**: [C<sub>103</sub>H<sub>164</sub>N<sub>30</sub>O<sub>41</sub>P<sub>2</sub> + 2H]<sup>+</sup> found: 1270.5652, calculated: 1270.5646.

**Ac-Gly-Lys-Ser-Ser-Gly-Pro-Thr(5-O-adenosine-diphosphate- $\alpha$ -D-ribose)-Ser-Leu-Phe-OH (27)**

The above described procedures were applied to 50  $\mu$ mol Tentagel<sup>®</sup> S AC resin preloaded with phenylalanine. The amino acids used were: Fmoc-Gly-OH, Fmoc-Lys(Mtt)-OH, Fmoc-Ser(Trt)-OH, Fmoc-Pro-OH, Fmoc-Thr(Trt)-OH, Fmoc-Leu-OH and **20**. The crude peptide was purified by RP-HPLC in NH<sub>4</sub>OAc buffer. The pure fractions were concentrated, co-evaporated extensively with a 1:1 mixture of MeCN:Milli-Q water, redissolved in Milli-Q water and lyophilized to obtain titled compound as a white solid (7.57 mg, 4.74  $\mu$ mol, 9.5%). **<sup>1</sup>H NMR** (850 MHz, D<sub>2</sub>O)  $\delta$  8.50 (s, 1H, H-2 adenine), 8.21 (s, 1H, H-8 adenine), 7.28 (t, J = 7.5 Hz, 2H, Phe arom.), 7.22 (t, J = 7.3 Hz, 1H, Phe arom.), 7.16 (d, J = 7.0 Hz, 2H, Phe arom.), 6.10 (d, J = 5.6 Hz, 1H, H-1' adenosine), 4.96 (d, J = 4.5 Hz, 1H, H-1' ribosyl). **<sup>31</sup>P NMR** (202 MHz, D<sub>2</sub>O)  $\delta$  -11.15, -11.26, -11.33, -11.44. **LC-MS** (10  $\rightarrow$  90% B in A): Rt = 3.33. **HRMS**: [C<sub>60</sub>H<sub>92</sub>N<sub>16</sub>O<sub>29</sub>P<sub>2</sub> + 2H]<sup>+</sup> found: 782.2905, calculated: 782.2918.

**Ac-Lys-Glu-Ser-Thr(5-O-adenosine-diphosphate- $\alpha$ -D-ribose)-Leu-His-Leu-Val-Leu-Arg-Leu-OH (28)**

50  $\mu$ mol Tentagel S AC resin was loaded by treating the resin with 2.5 mL of a 0.2M Fmoc-Leu-OH solution (10 eq.) and DIC (77  $\mu$ L, 0.5 mmol, 10 eq.) in DMF together with a catalytic amount of DMAP for 2 hours. The resin was drained and washed with DMF after which the above described procedures were applied. The amino acids used were Fmoc-Lys(Mtt)-OH, Fmoc-Glu(O-2-PhiPr)-OH, Fmoc-Ser(Trt)-OH, Fmoc-Leu-OH, Fmoc-His(Trt)-OH, Fmoc-Val-OH, Fmoc-Arg(Alloc)<sub>2</sub>-OH and **20**. The Alloc protecting group was removed by treating the resin with a freshly prepared solution of 10 mg Pd(PPh<sub>3</sub>)<sub>4</sub> and 23 mg DMBA in 2.5 mL DCM. This procedure was then repeated twice prior to cleavage and final deprotection of remaining protecting groups. The crude peptide was purified by RP-HPLC in NH<sub>4</sub>OAc buffer. The pure fractions were concentrated, co-evaporated extensively with a 1:1 mixture of MeCN:Milli-Q water, redissolved in Milli-Q water and lyophilized to obtain titled compound as a white solid (0.91 mg, 0.47  $\mu$ mol, 0.94%). **<sup>1</sup>H NMR** (850 MHz, D<sub>2</sub>O)  $\delta$  8.47 (s, 1H, H-2 adenine), 8.21 (s, 1H, H-8 adenine), 6.09 (d, J = 6.0 Hz, 1H, H-1' adenosine), 4.95 (d, J = 4.0 Hz, 1H, H-1' ribosyl). **LC-**

**MS** (10 → 90% B in A): Rt = 4.50. **HRMS**: [C<sub>76</sub>H<sub>128</sub>N<sub>22</sub>O<sub>30</sub>P<sub>2</sub> + 2H]<sup>+</sup> found: 946.4379, calculated: 946.4394.

### **Ac-Pro-Ala-Lys-Cys(5-O-adenosine diphosphate- $\alpha$ -D-ribosyl)-Ala-Pro-Ala-Pro-Lys-Lys-Gly-OH (29)**

The above described procedures were applied to 50  $\mu$ mol Tentagel<sup>®</sup> S AC resin preloaded with glycine. The amino acids used were: Fmoc-Pro-OH, Fmoc-Ala-OH, Fmoc-Lys(Mtt)-OH and **21**. The crude peptide was purified by RP-HPLC in NH<sub>4</sub>OAc buffer. The pure fractions were concentrated, co-evaporated extensively with a 1:1 mixture of MeCN:Milli-Q water, redissolved in Milli-Q water and lyophilized to obtain titled compound as a white solid (3.43 mg, 2.04  $\mu$ mol, 4.1%). **<sup>1</sup>H NMR** (850 MHz, D<sub>2</sub>O)  $\delta$  8.49 (s, 1H, H-2 adenine), 8.23 (s, 1H, H-8 adenine), 6.10 (d, J = 6.1 Hz, 1H, H-1' adenosine), 5.38 (d, J = 4.8 Hz, 1H, H-1' ribosyl). **<sup>31</sup>P NMR** (202 MHz, D<sub>2</sub>O)  $\delta$  -11.11, -11.21, -11.30, -11.40. **LC-MS** (0 → 50% B in A): Rt = 4.42. **HRMS**: [C<sub>64</sub>H<sub>105</sub>N<sub>19</sub>O<sub>26</sub>P<sub>2</sub> + 2H]<sup>+</sup> found: 825.8408, calculated: 825.8410.

### **Biotin-Pro-Ala-Lys-Cys(5-O-adenosine diphosphate- $\alpha$ -D-ribosyl)-Ala-Pro-Ala-Pro-Lys-Lys-Gly-OH (30)**

The above described procedures were applied to 50  $\mu$ mol Tentagel<sup>®</sup> S AC resin preloaded with glycine. The amino acids used were: Fmoc-Pro-OH, Fmoc-Ala-OH, Fmoc-Lys(Mtt)-OH and **21**. Oxidation steps were carried out with a 0.5M *t*BuOOH solution in MeCN. The crude peptide was purified by RP-HPLC in NH<sub>4</sub>OAc buffer. The pure fractions were concentrated, co-evaporated extensively with a 1:1 mixture of MeCN:Milli-Q water, redissolved in Milli-Q water and lyophilized to obtain titled compound as a white solid (1.73 mg, 0.93  $\mu$ mol, 1.9%). **<sup>1</sup>H NMR** (850 MHz, D<sub>2</sub>O)  $\delta$  8.49 (s, 1H, H-2 adenine), 8.23 (s, 1H, H-8 adenine), 6.10 (d, J = 6.1 Hz, 1H, H-1' adenosine), 5.38 (d, J = 4.7 Hz, 1H, H-1' ribosyl). **LC-MS** (0 → 50% B in A): Rt = 5.52. **HRMS**: [C<sub>72</sub>H<sub>117</sub>N<sub>21</sub>O<sub>27</sub>P<sub>2</sub>S<sub>2</sub> + 2H]<sup>+</sup> found: 917.8730, calculated: 917.8745.

## **References**

- [1] H. A. V Kistemaker, G. J. Van Der Heden Van Noort, H. S. Overkleeft, G. A. Van Der Marel, D. V. Filippov, *Org. Lett.* **2013**, *15*, 2306–2309.
- [2] R. R. Schmidt, J. Michel, *Angew. Chemie Int. Ed. English* **1980**, *19*, 731–732.
- [3] M. Ciommer, H. Kunz, *Synlett* **1991**, 593–595.
- [4] S. Rio, J. M. Beau, J. C. Jacquinet, *Carbohydr. Res.* **1991**, *219*, 71–90.
- [5] P. Fontana, J. J. Bonfiglio, L. Palazzo, E. Bartlett, I. Matic, I. Ahel, *Elife* **2017**, *6*, 1–20.
- [6] J. G. M. Rack, R. Morra, E. Barkauskaite, R. Kraehenbuehl, A. Ariza, Y. Qu, M. Ortmyer, O. Leidecker, D. R. Cameron, I. Matic, A. Y. Peleg, D. Leys, A. Traven, I. Ahel, *Mol. Cell* **2015**, *59*, 309–320.
- [7] D. Slade, M. S. Dunstan, E. Barkauskaite, R. Weston, P. Lafite, N. Dixon, M. Ahel, D. Leys, I. Ahel, *Nature* **2011**, *477*, 616–622.
- [8] J. Voorneveld, J. G. M. Rack, I. Ahel, H. S. Overkleeft, G. A. Van Der Marel, D. V. Filippov, *Org. Lett.* **2018**, *20*, DOI 10.1021/acs.orglett.8b01742.
- [9] L. Palazzo, B. Thomas, A. S. Jemth, T. Colby, O. Leidecker, K. L. H. Feijs, R. Zaja, O. Loseva, J. C. Vert, I. Matic, T. Helleday, I. Ahel, *Biochem. J.* **2015**, *468*, 293–301.
- [10] C. Atdjian, L. Iannazzo, E. Braud, M. Ethève-Quellejeu, *European J. Org. Chem.* **2018**, *2018*, 4411–4425.





C-NMR 1-O-( 2,3-bis-O-(4-methoxybenzyl)-5-O-((tert-butyl)-diphenylsilyl)-D-ribose)-N-fluorenylmethoxycarbonyl — serine allyl ester —

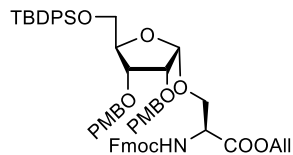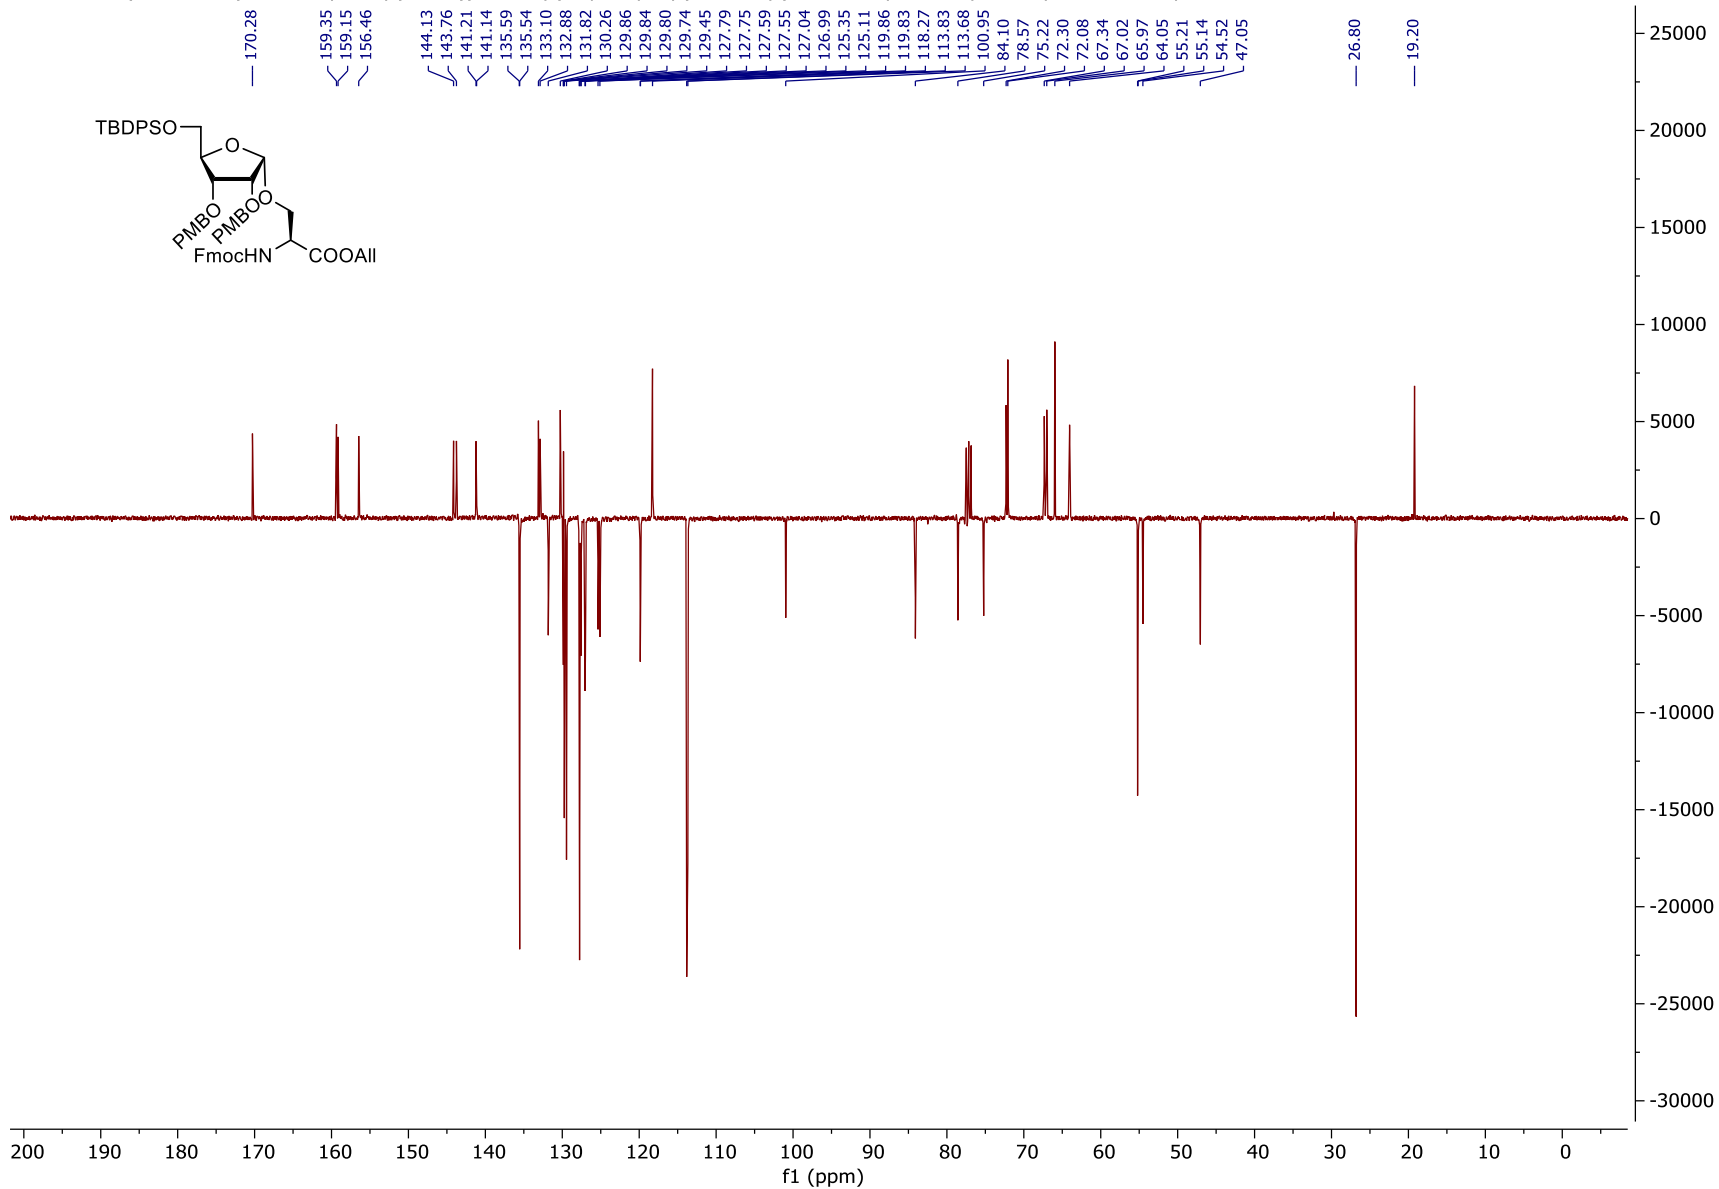

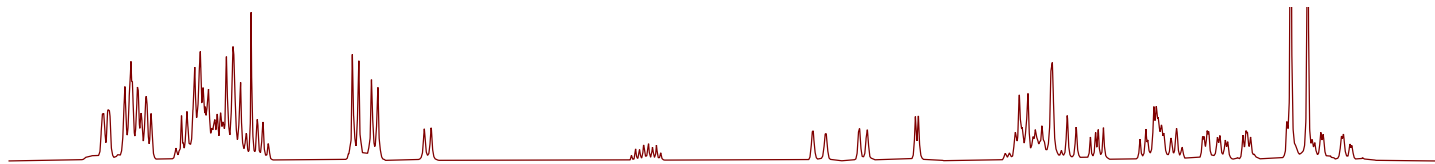

COSY 1-O-(2,3-bis-O-(4-methoxybenzyl)-5-O-((tert-butyl)-diphenylsilyl)-D-ribose)-N-fluorenylmethoxycarbonyl serine allyl ester

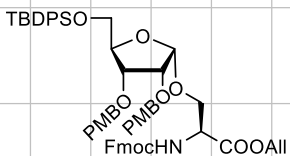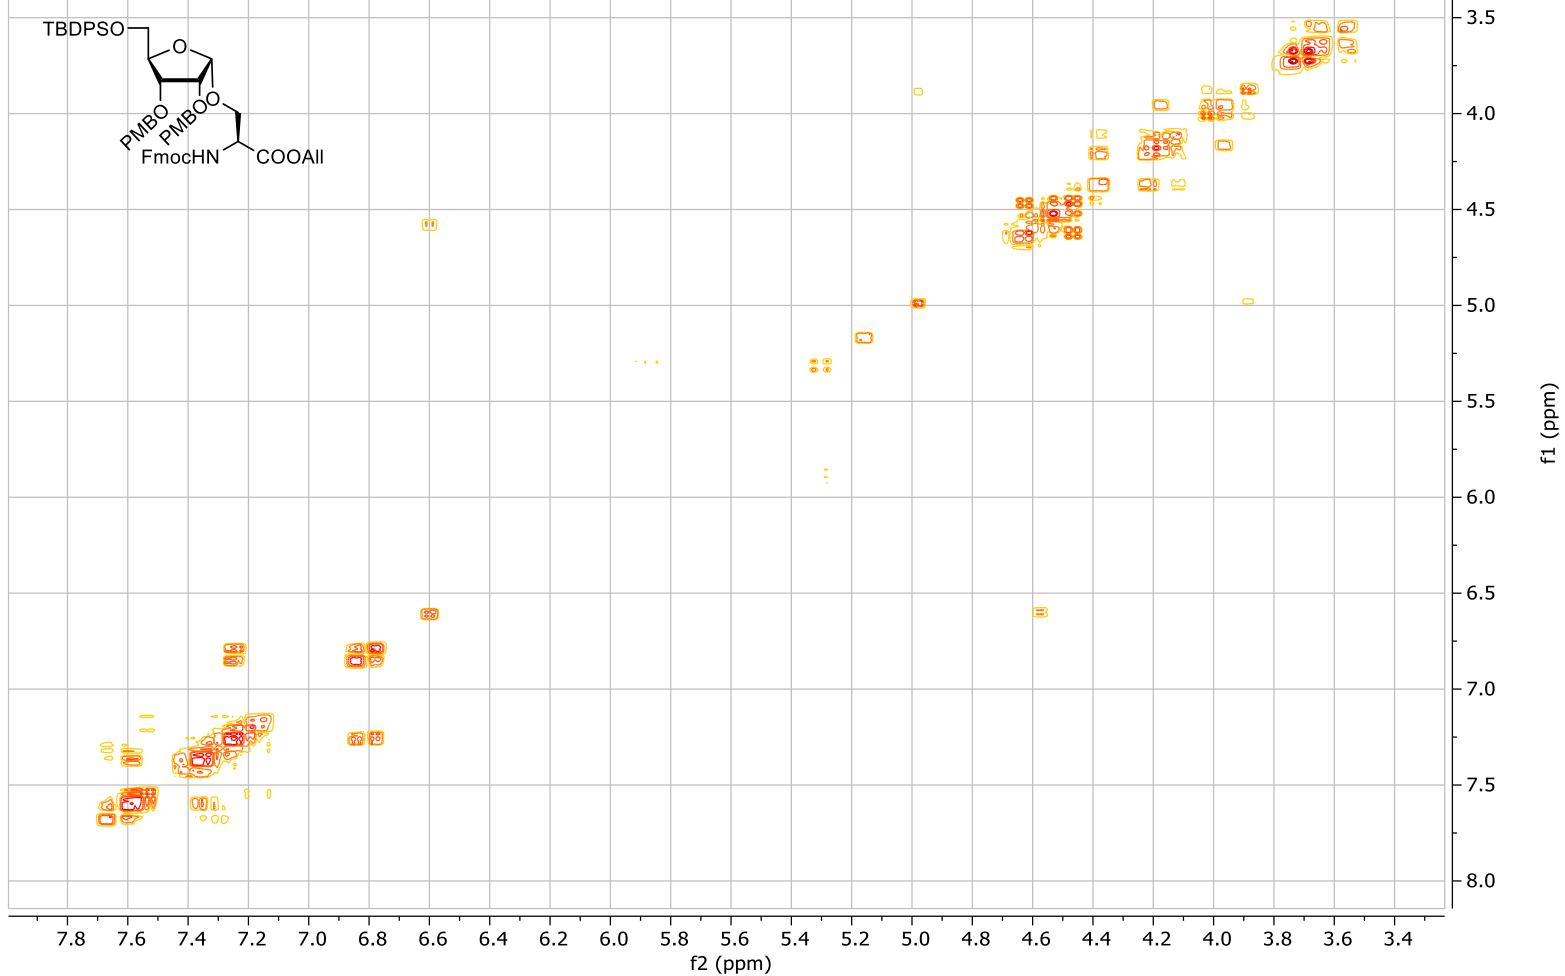

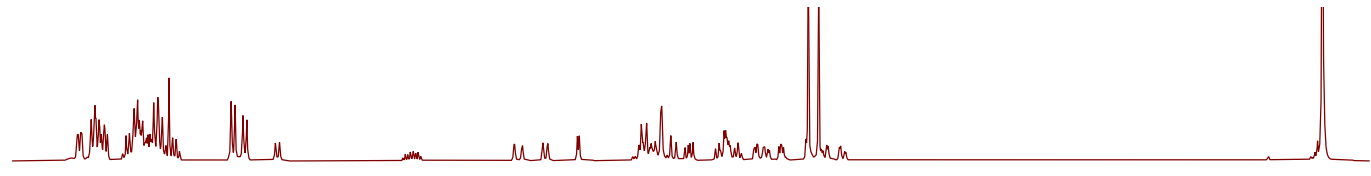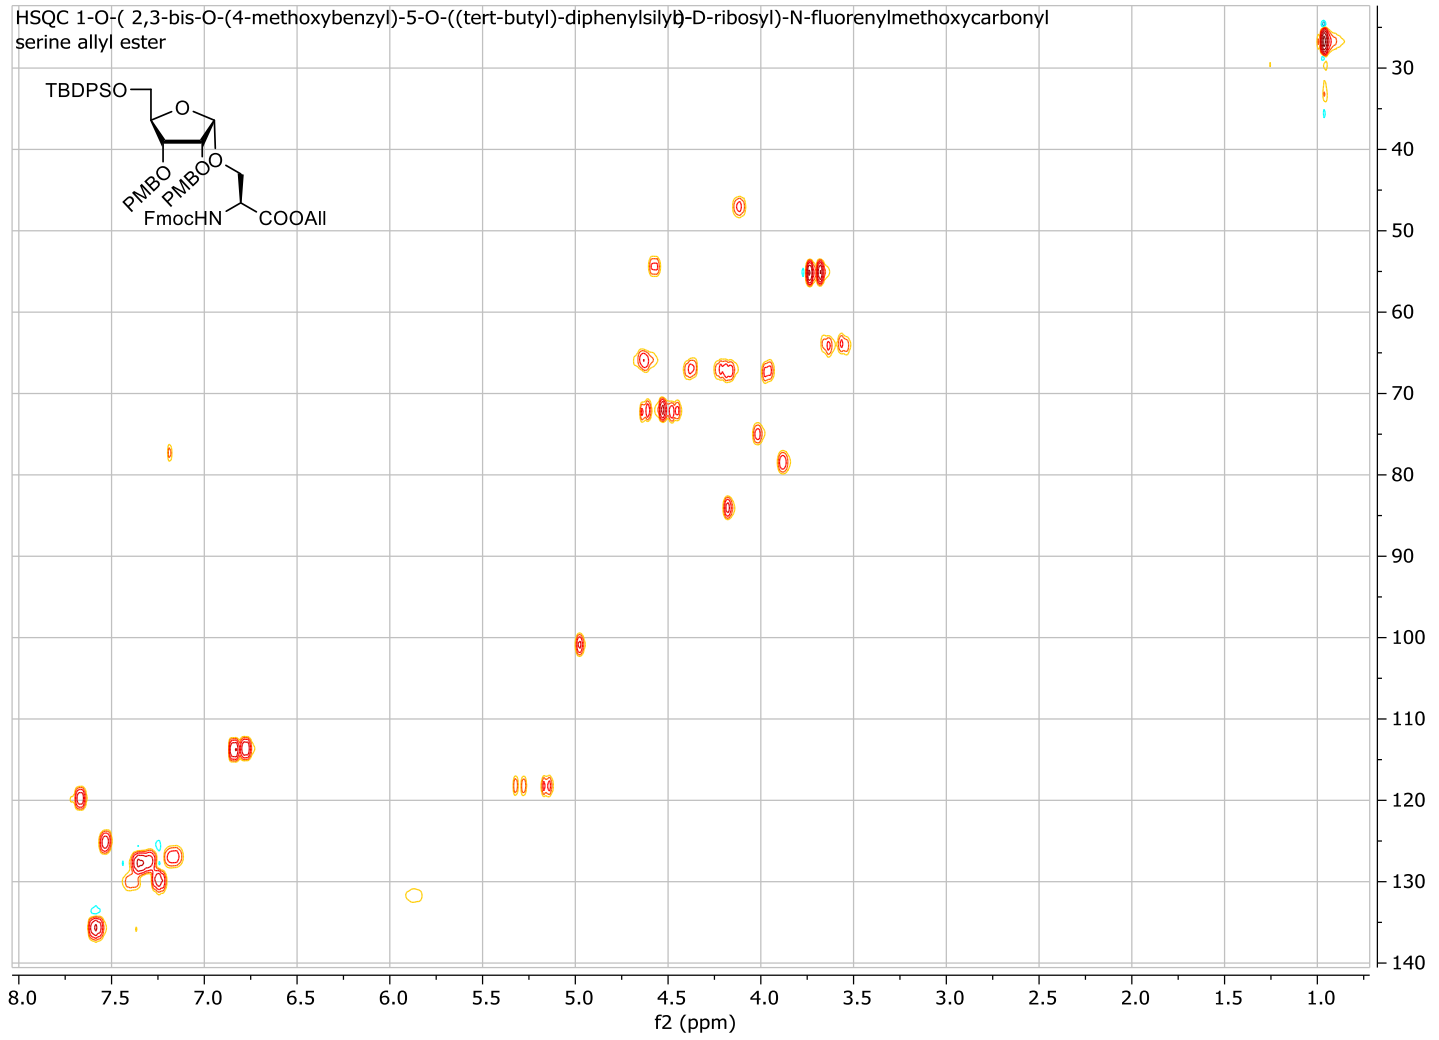

H-NMR 1-O-(2,3-bis-O-(4-methoxybenzyl)-5-O-((tert-butyl)-diphenylsilyl)-D-ribose)-N-fluorenylmethoxycarbonyl — threonine allyl ester —

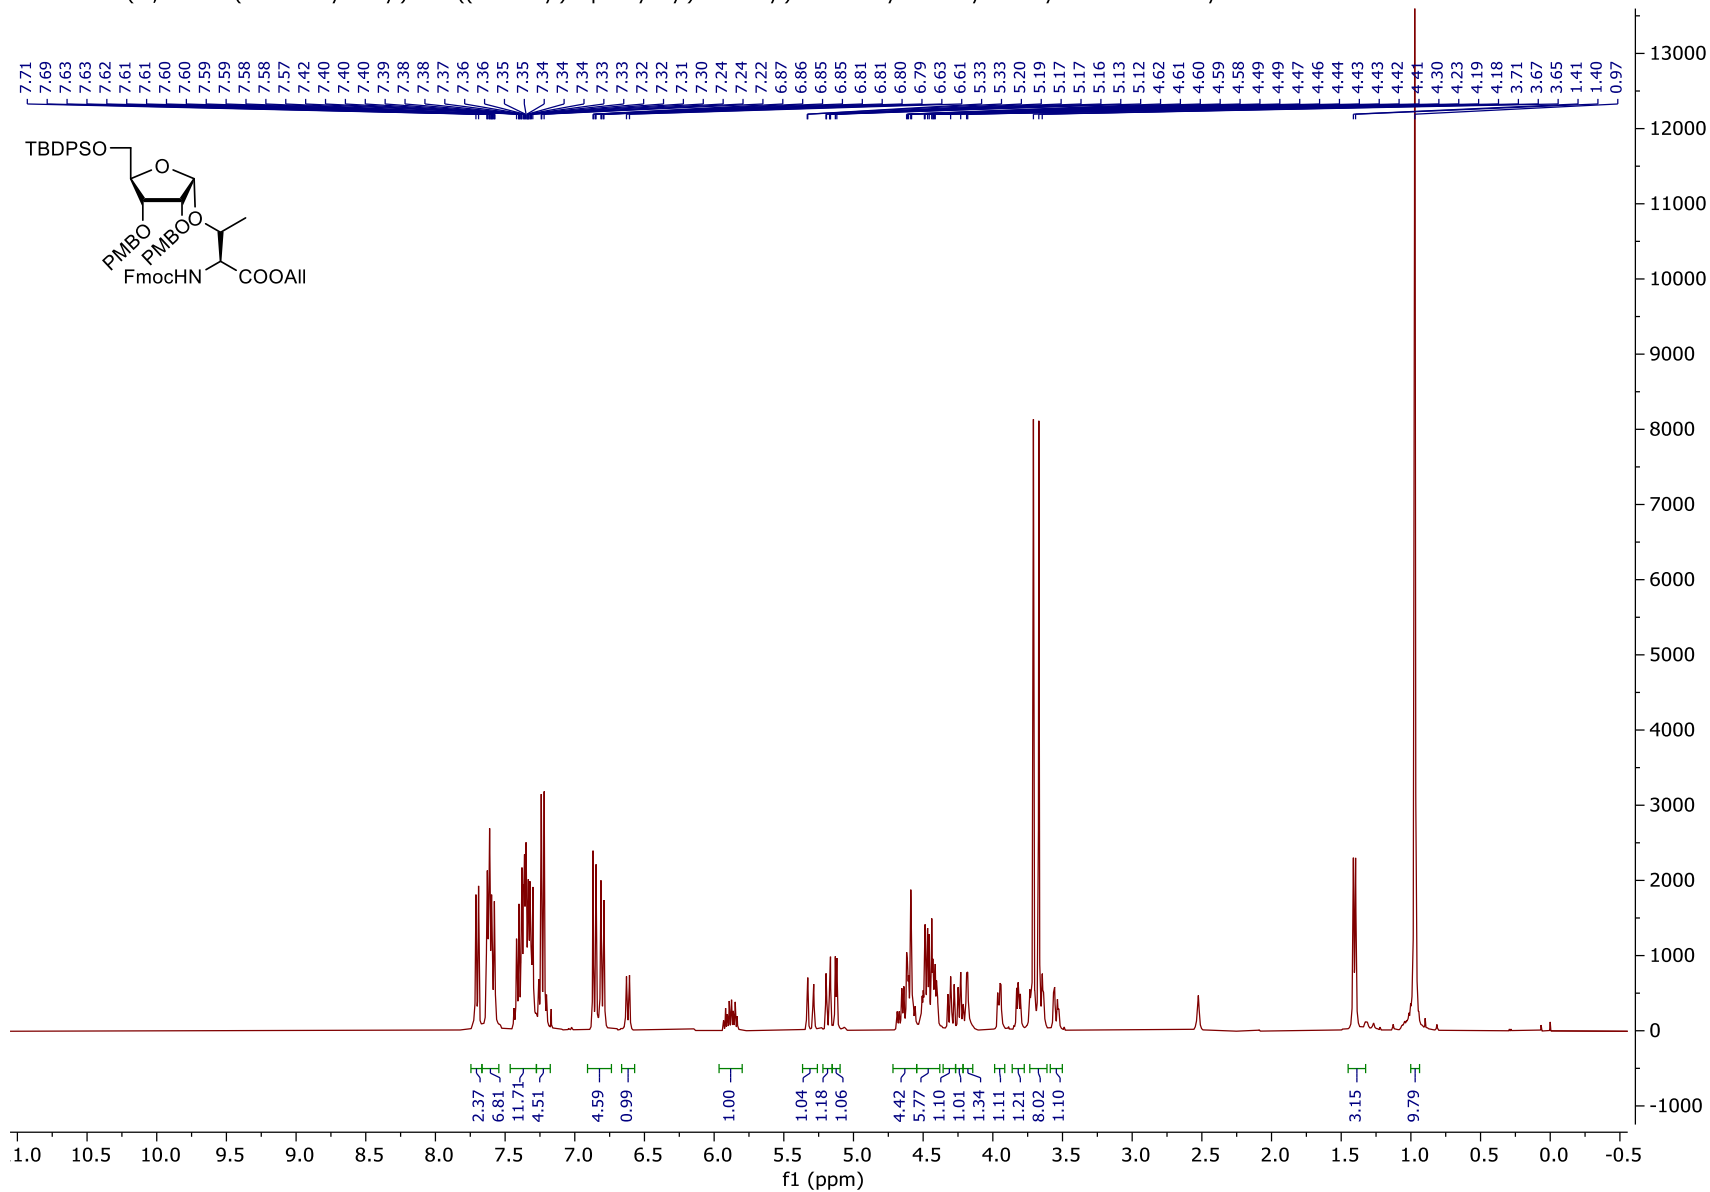

C- NMR 1-O-( 2,3-bis-O-(4-methoxybenzyl)-5-O-((tert-butyl)-diphenylsilyl)-D-ribose)-N-fluorenylmethoxycarbonyl — threonine allyl ester —

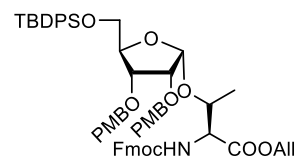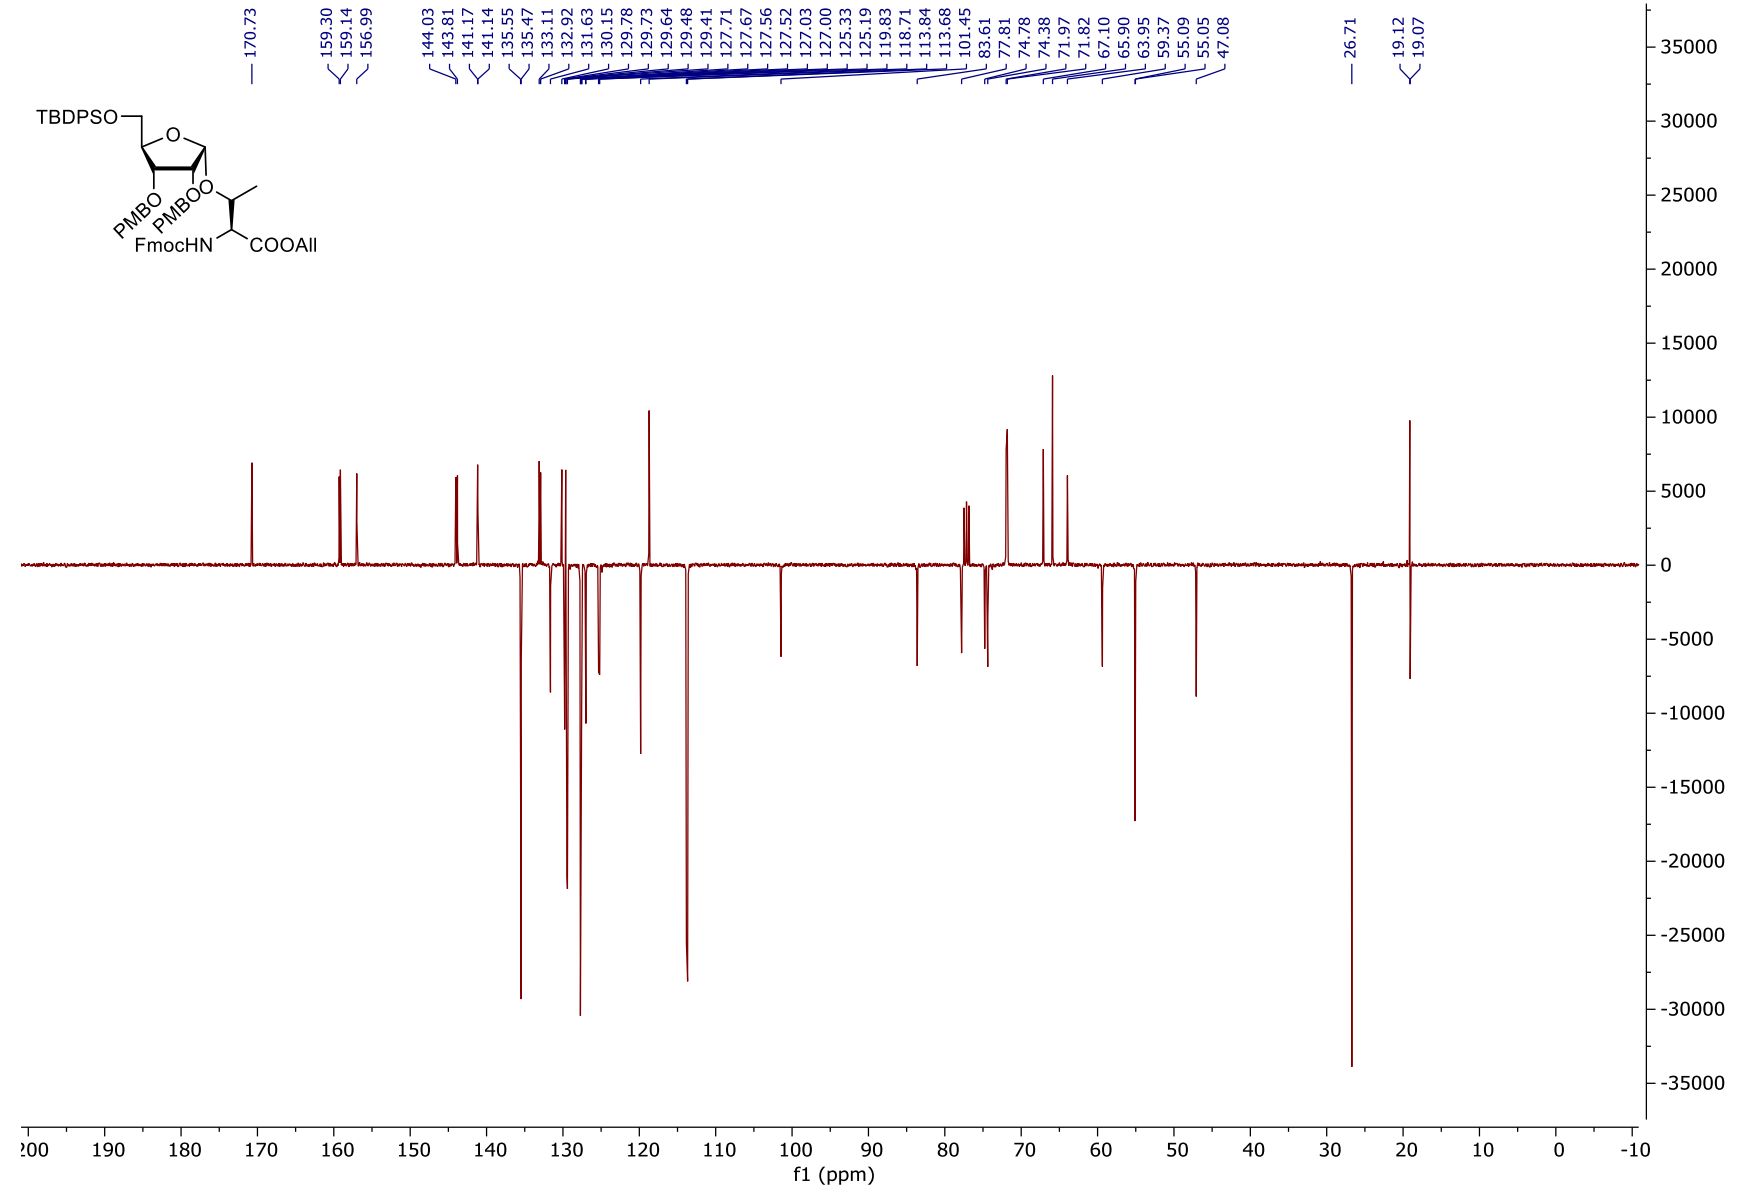





H-NMR 1-O-(2,3-bis-O-(4-methoxybenzyl)-5-O-((tert-butyl)-diphenylsilyl)-D-ribose)-N-fluorenylmethoxycarbonyl  
cysteine allyl ester

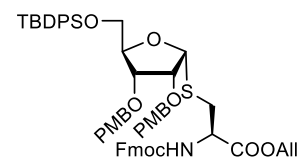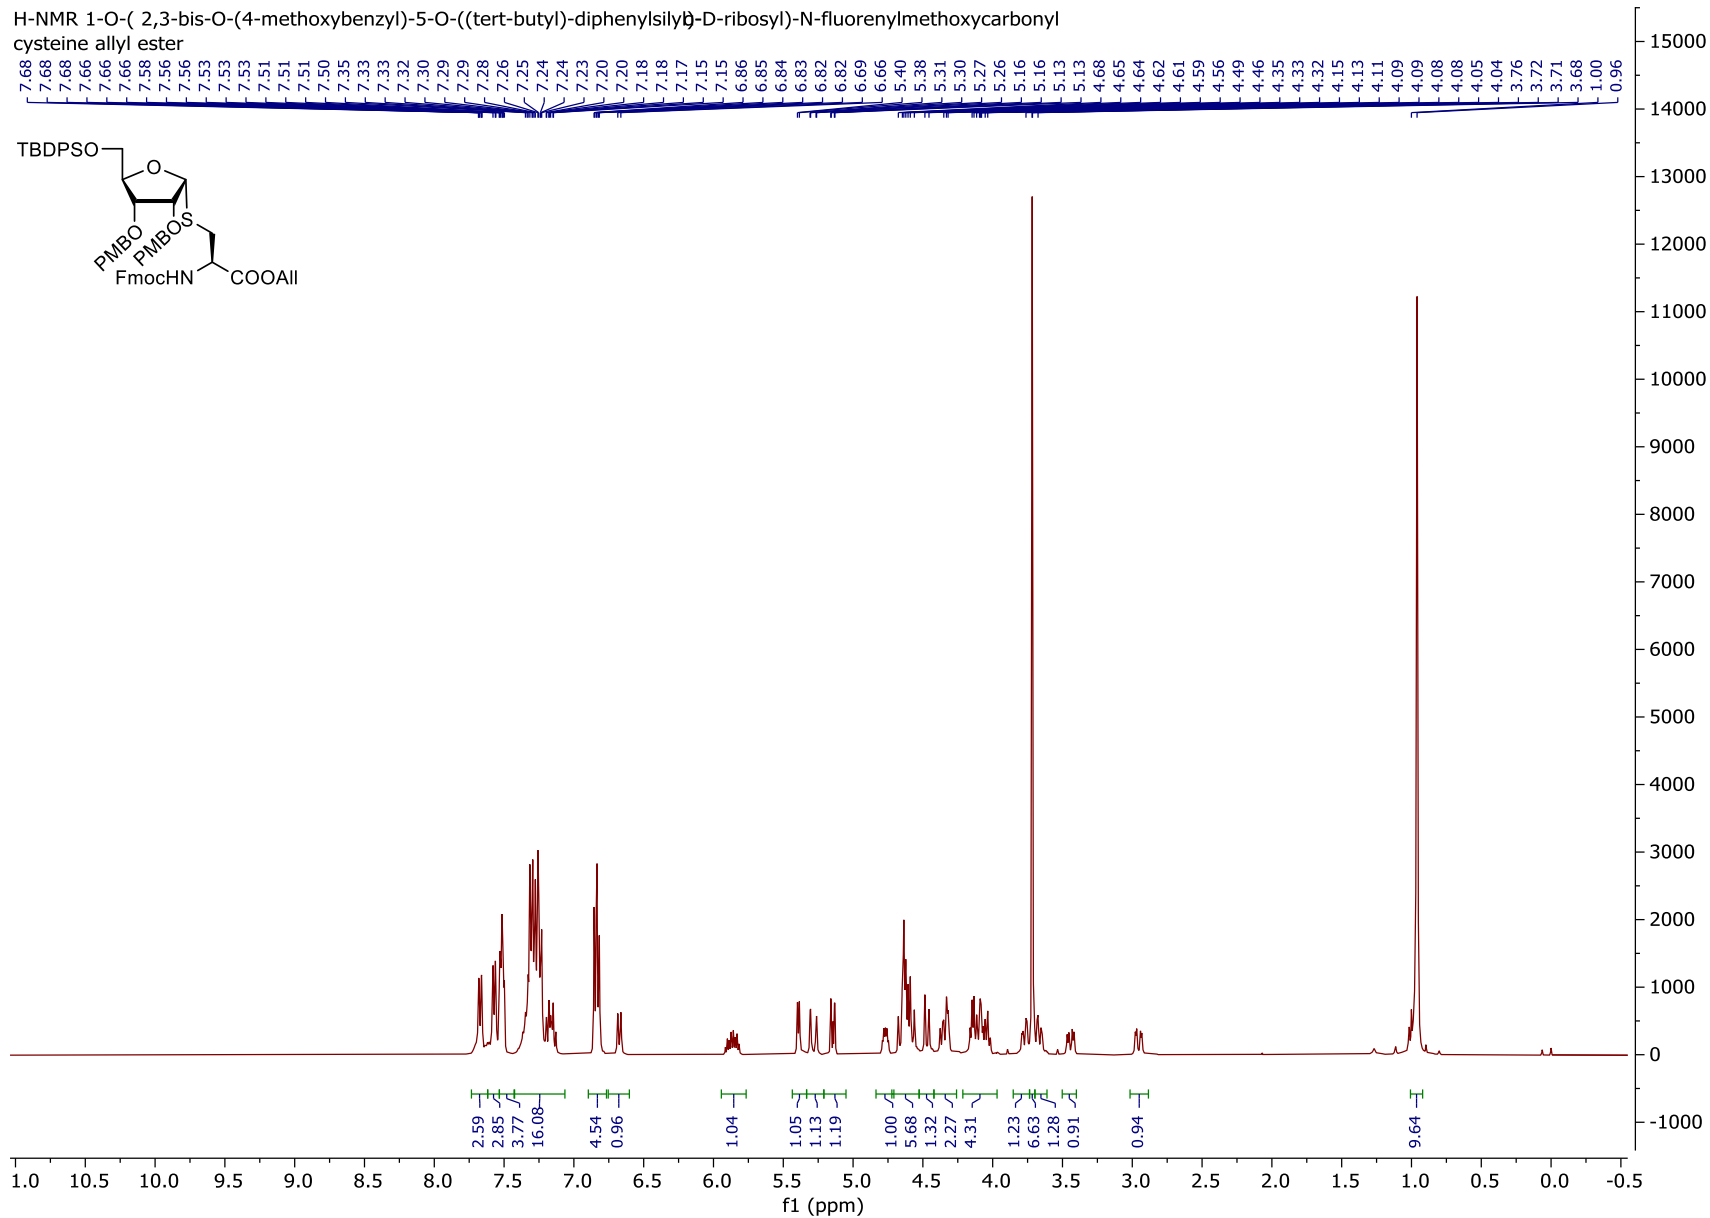



C-NMR 1-O-( 2,3-bis-O-(4-methoxybenzyl)-5-O-((tert-butyl)-diphenylsilyl)-D-ribose)-N-fluorenylmethoxycarbonyl — cysteine allyl ester

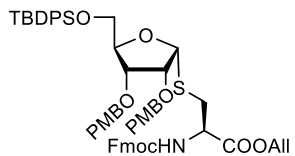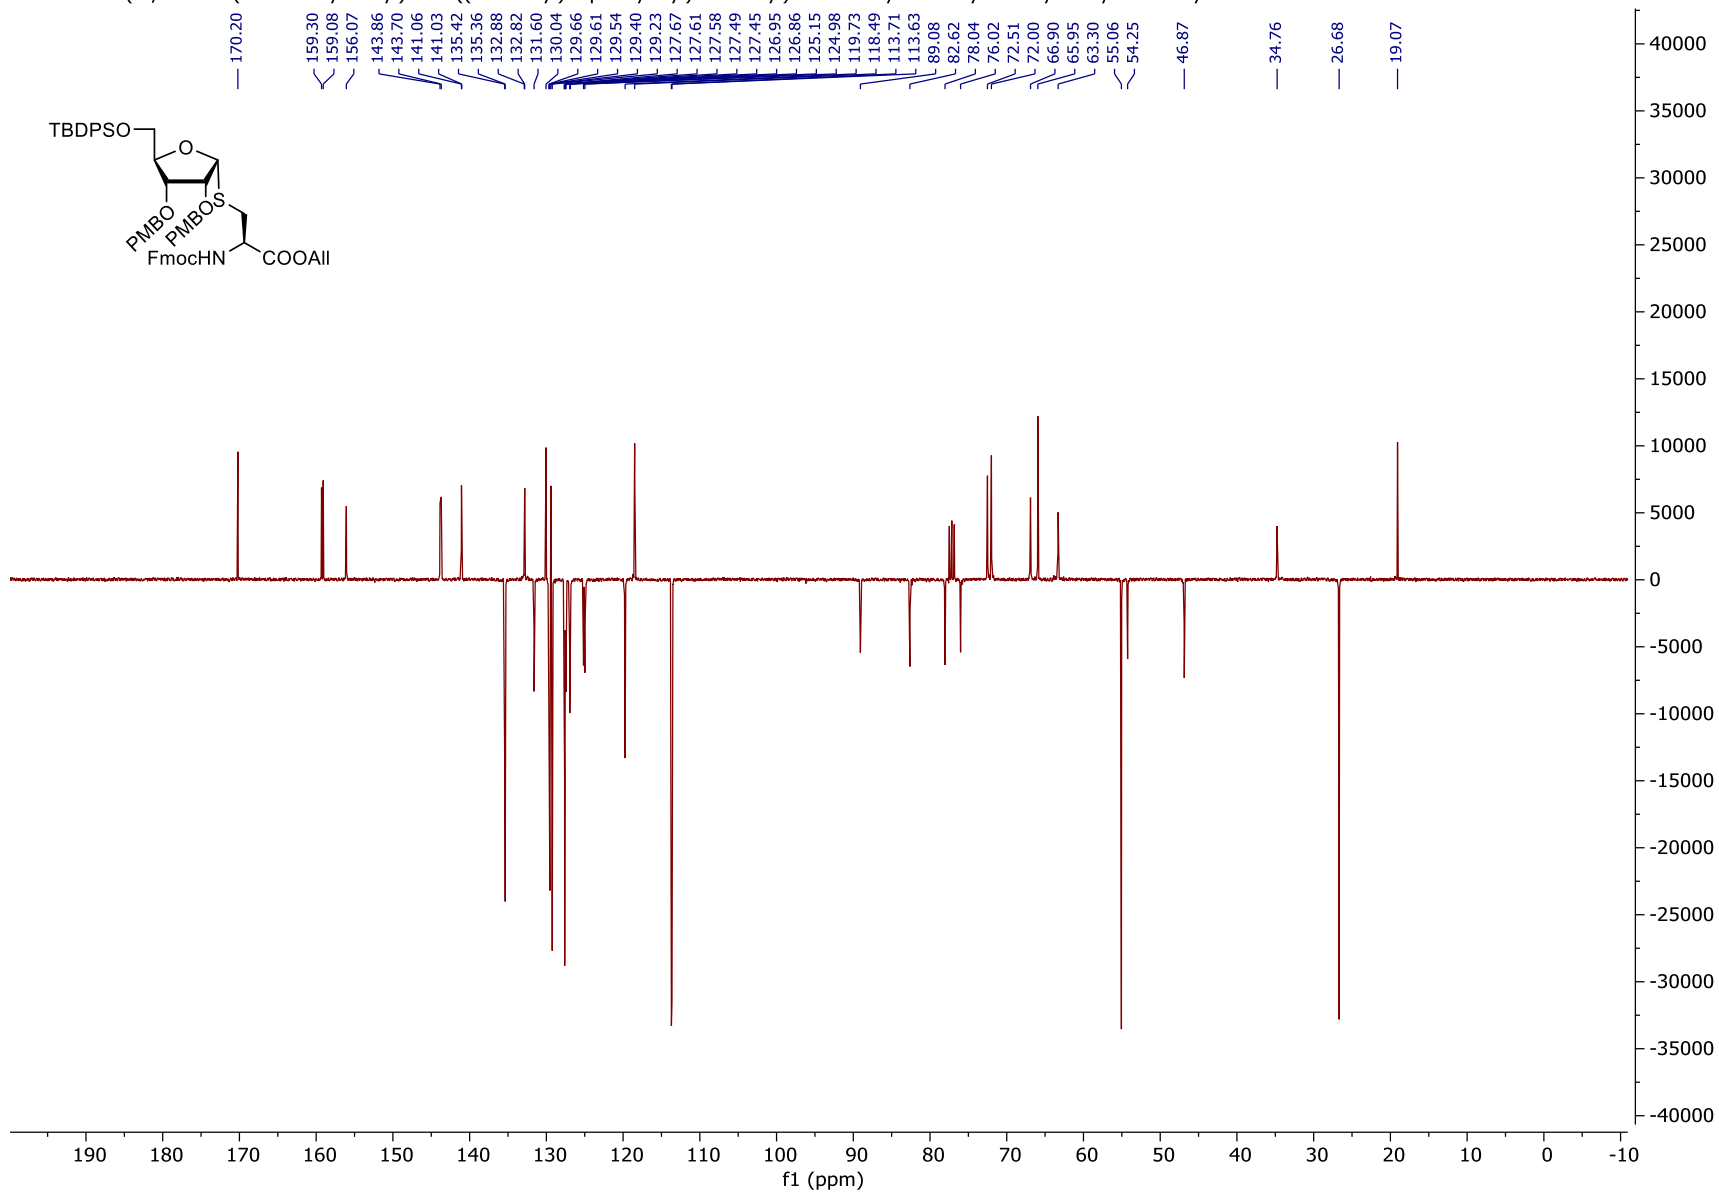

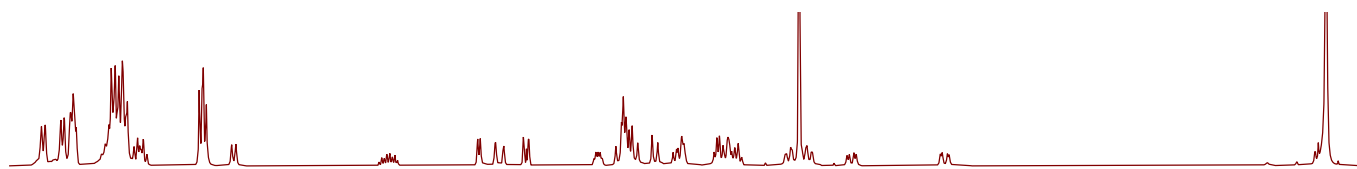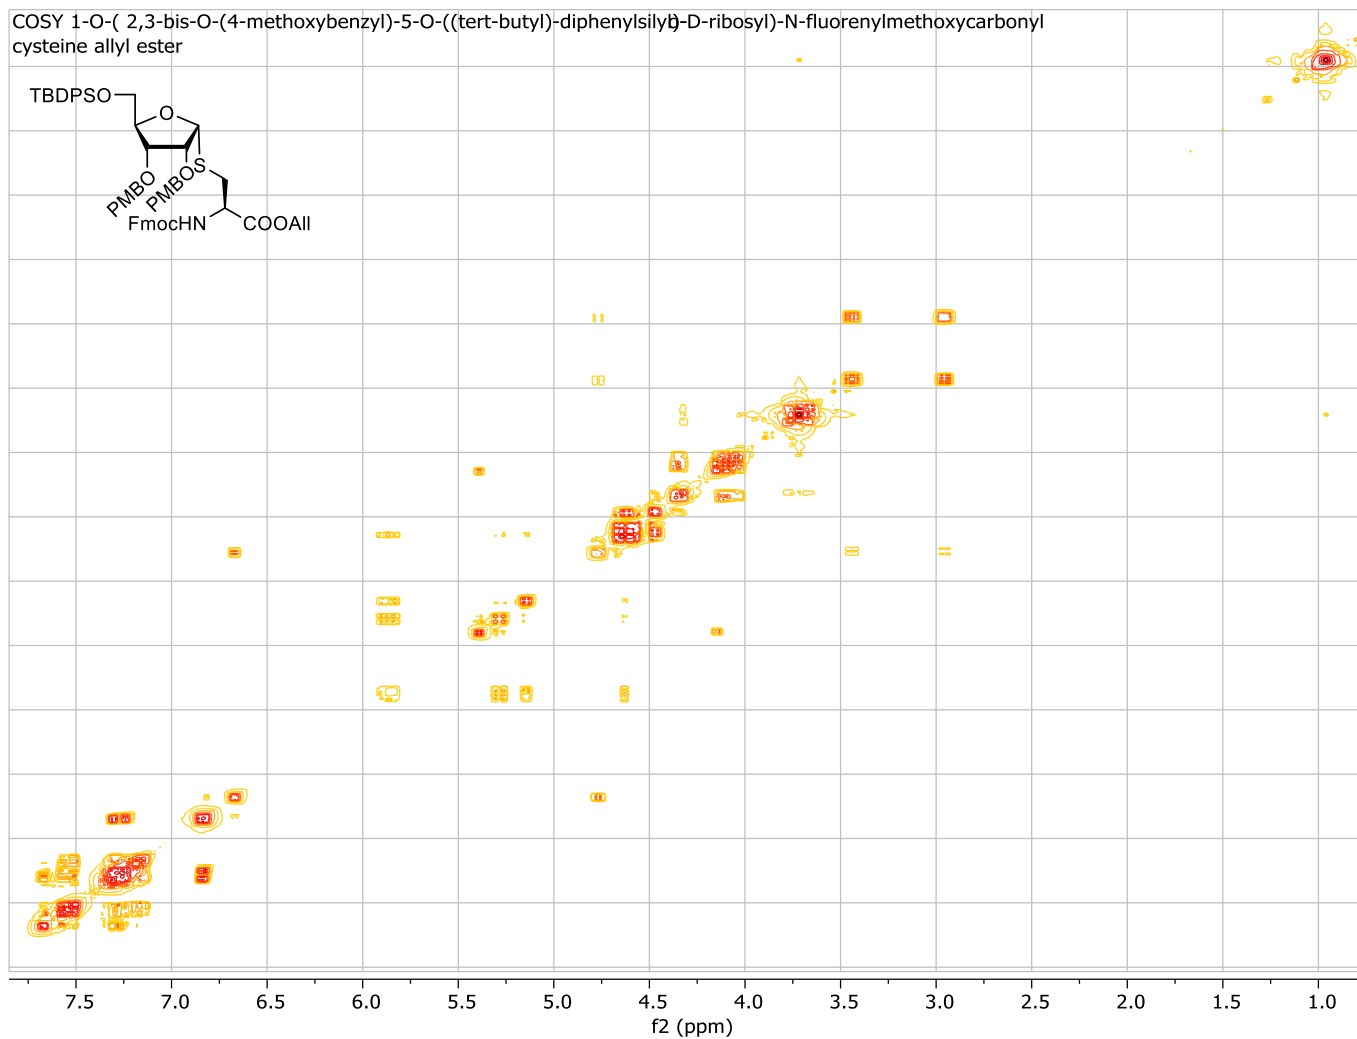

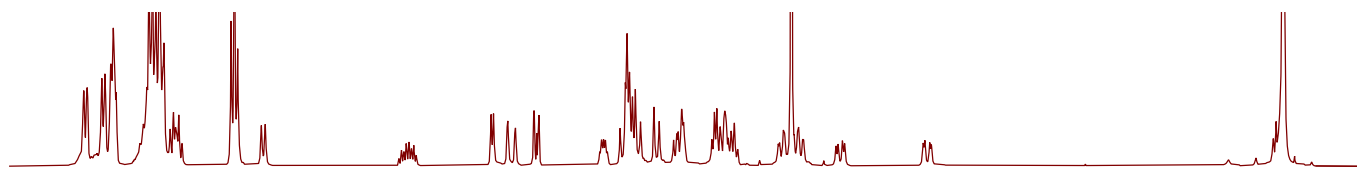

HSQC 1-O-(2,3-bis-O-(4-methoxybenzyl)-5-O-((tert-butyl)-diphenylsilyl)-D-ribose)-N-fluorenylmethoxycarbonyl cysteine allyl ester

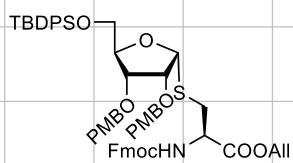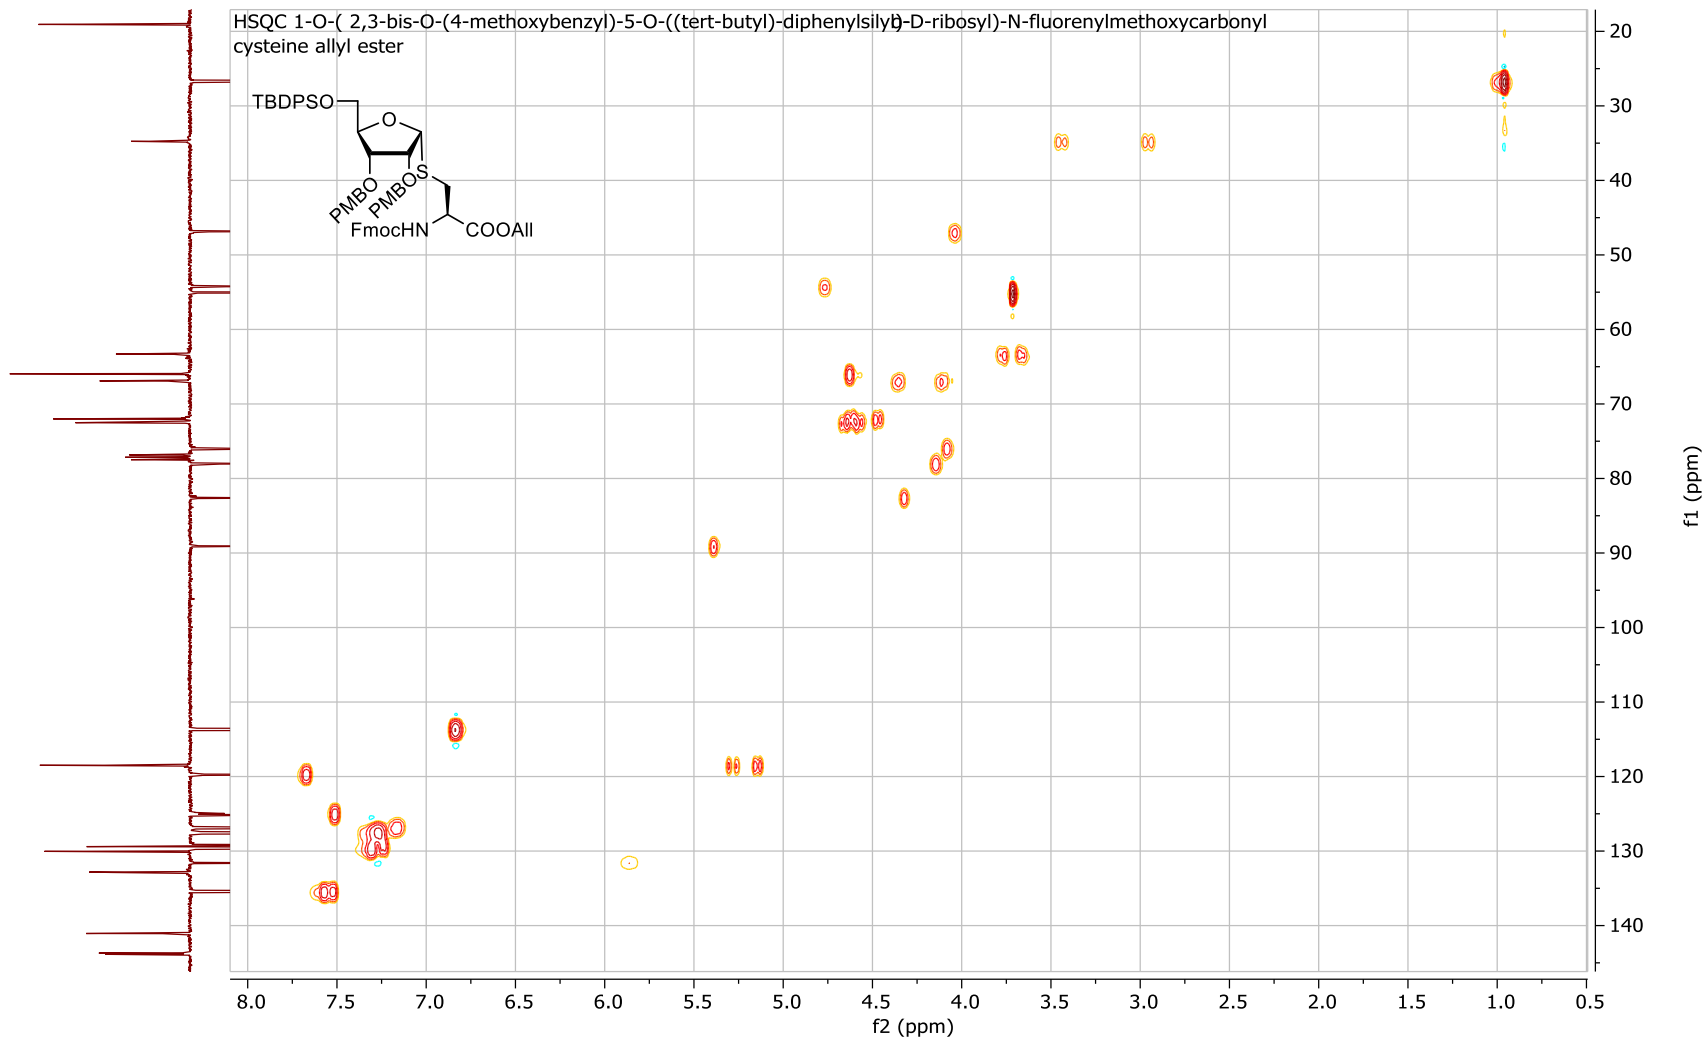

H-NMR 1-O-(2,3-bis-O-(4-methoxybenzyl)-5-O-((tert-butyl-diphenylsilyl)-D-ribose)-N-fluorenylmethoxycarbonyl serine

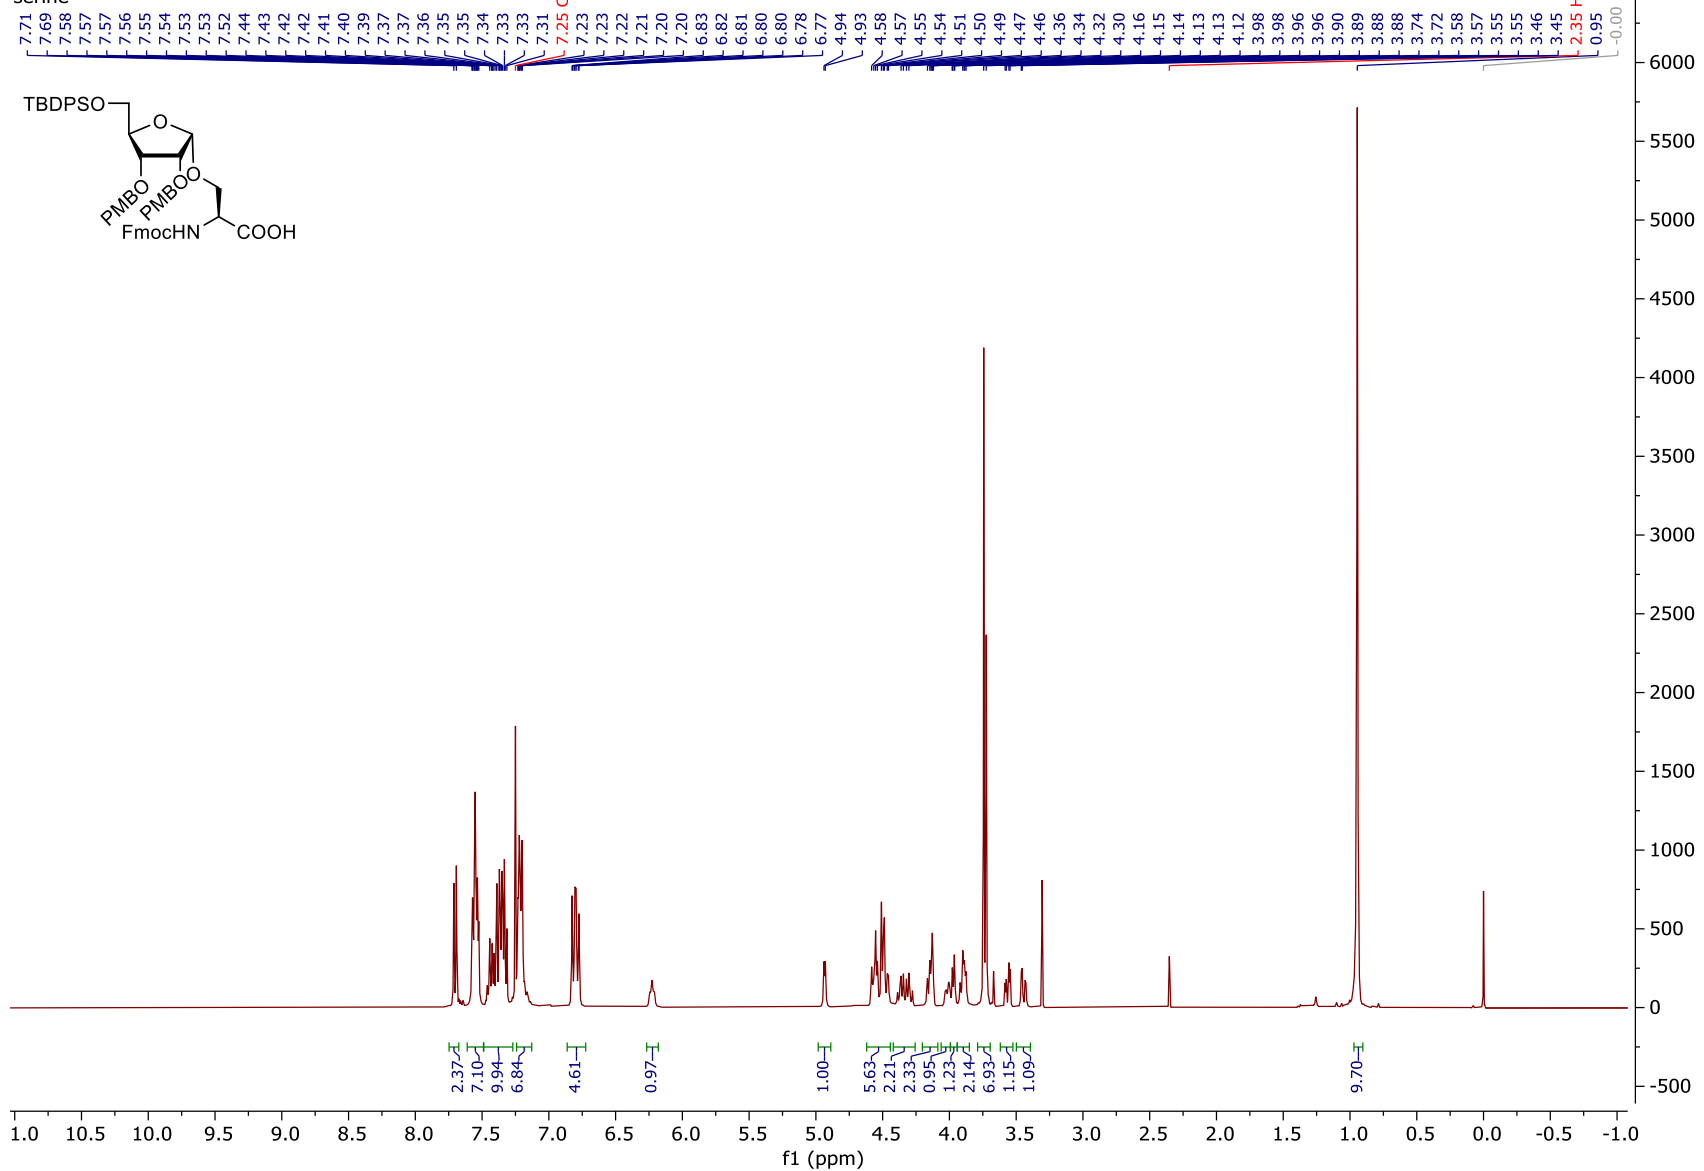

C-NMR 1-O-(2,3-bis-O-(4-methoxybenzyl)-5-O-((tert-butyl)-diphenylsilyl)-D-ribose)-N-fluorenylmethoxycarbonyl-serine

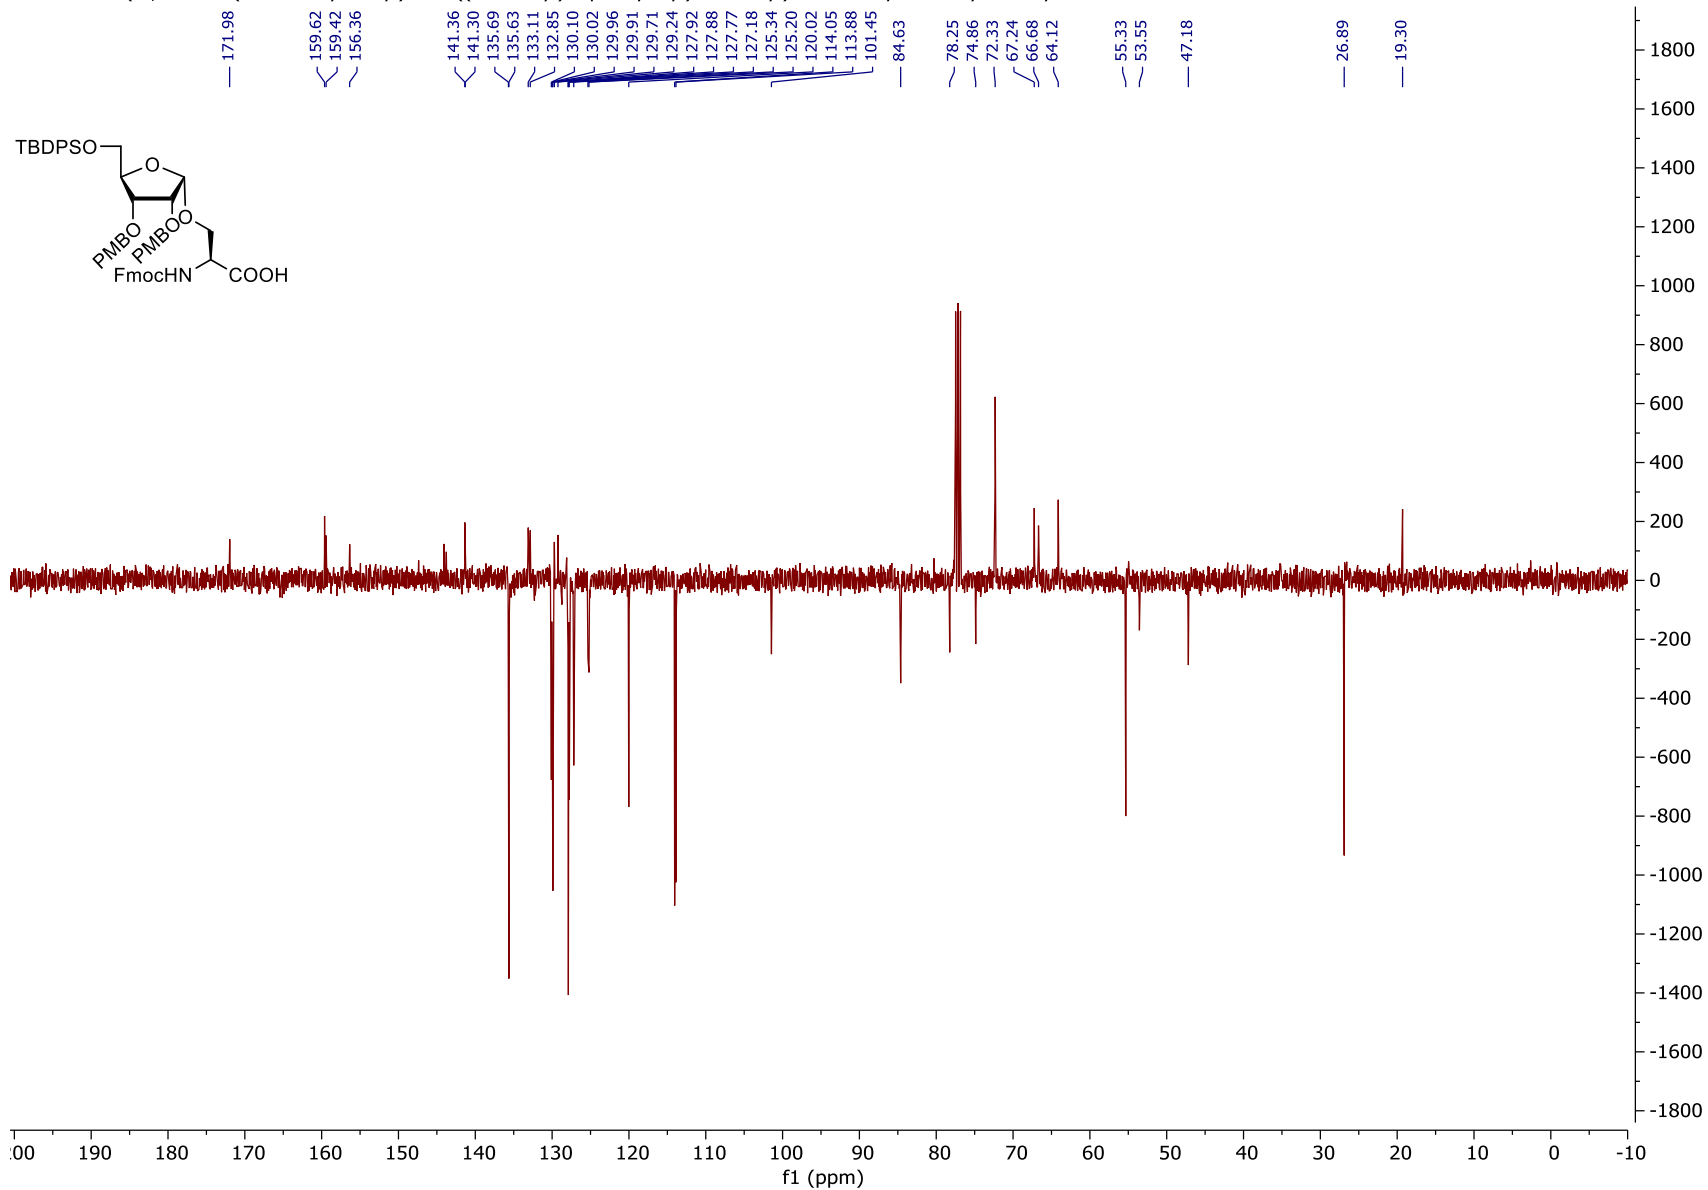

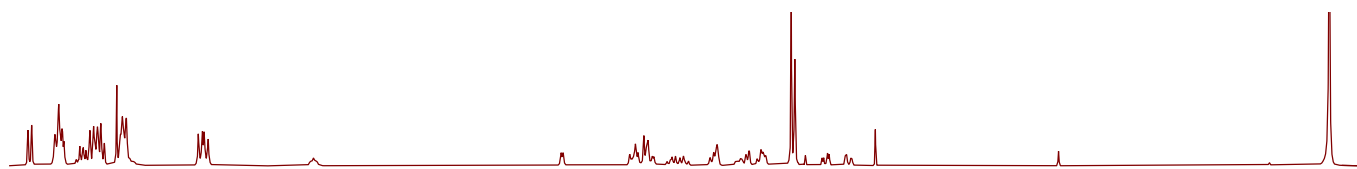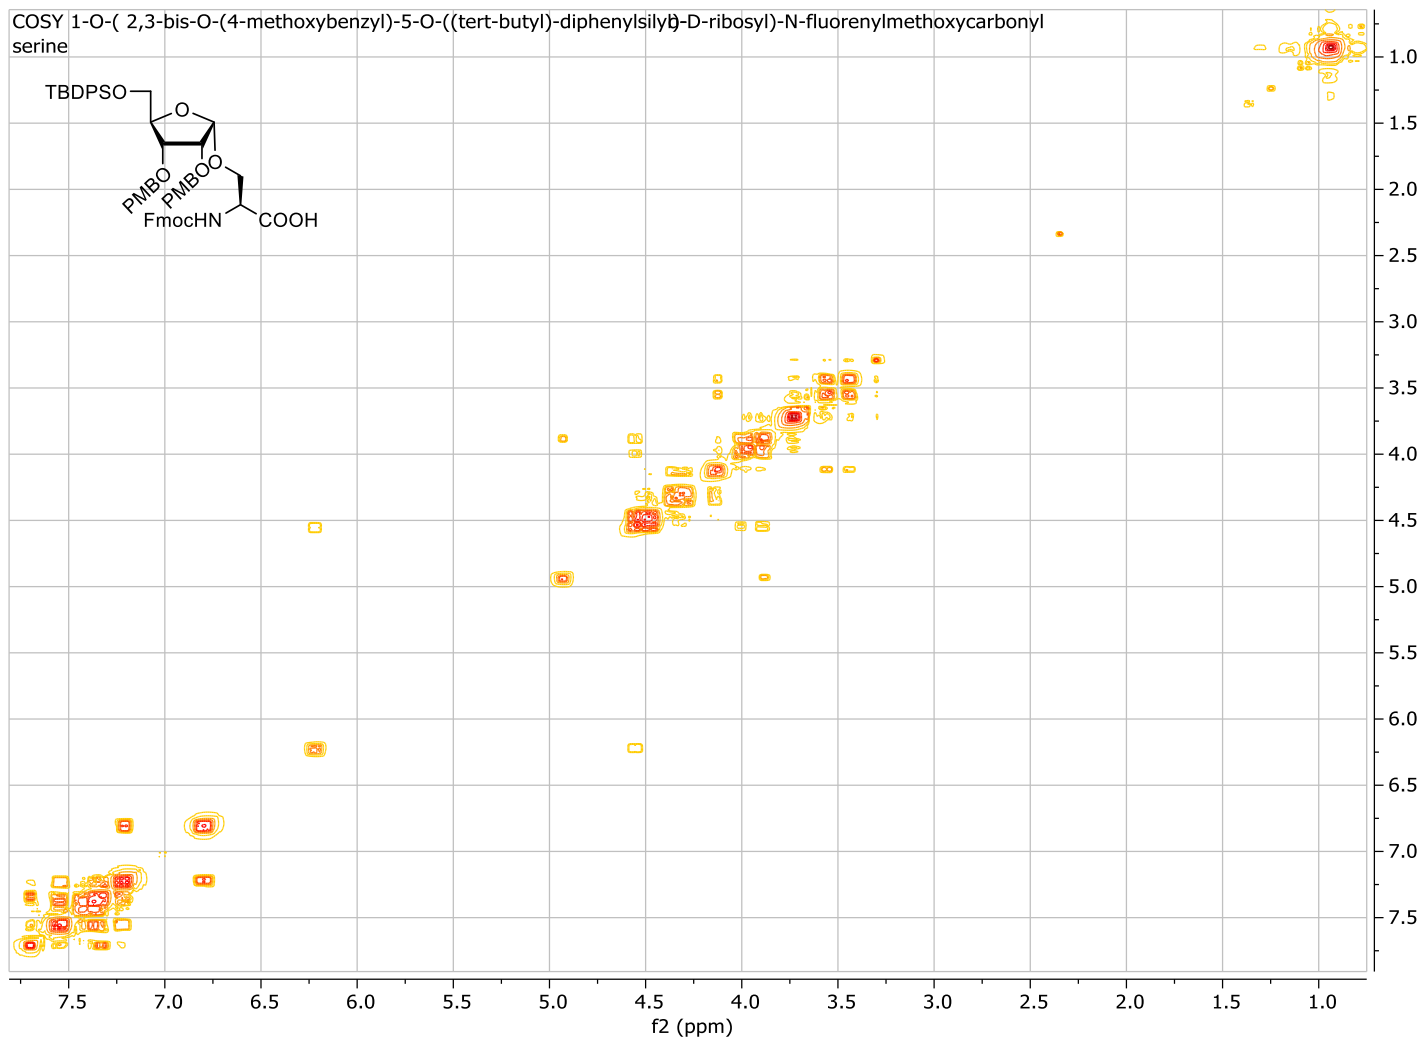

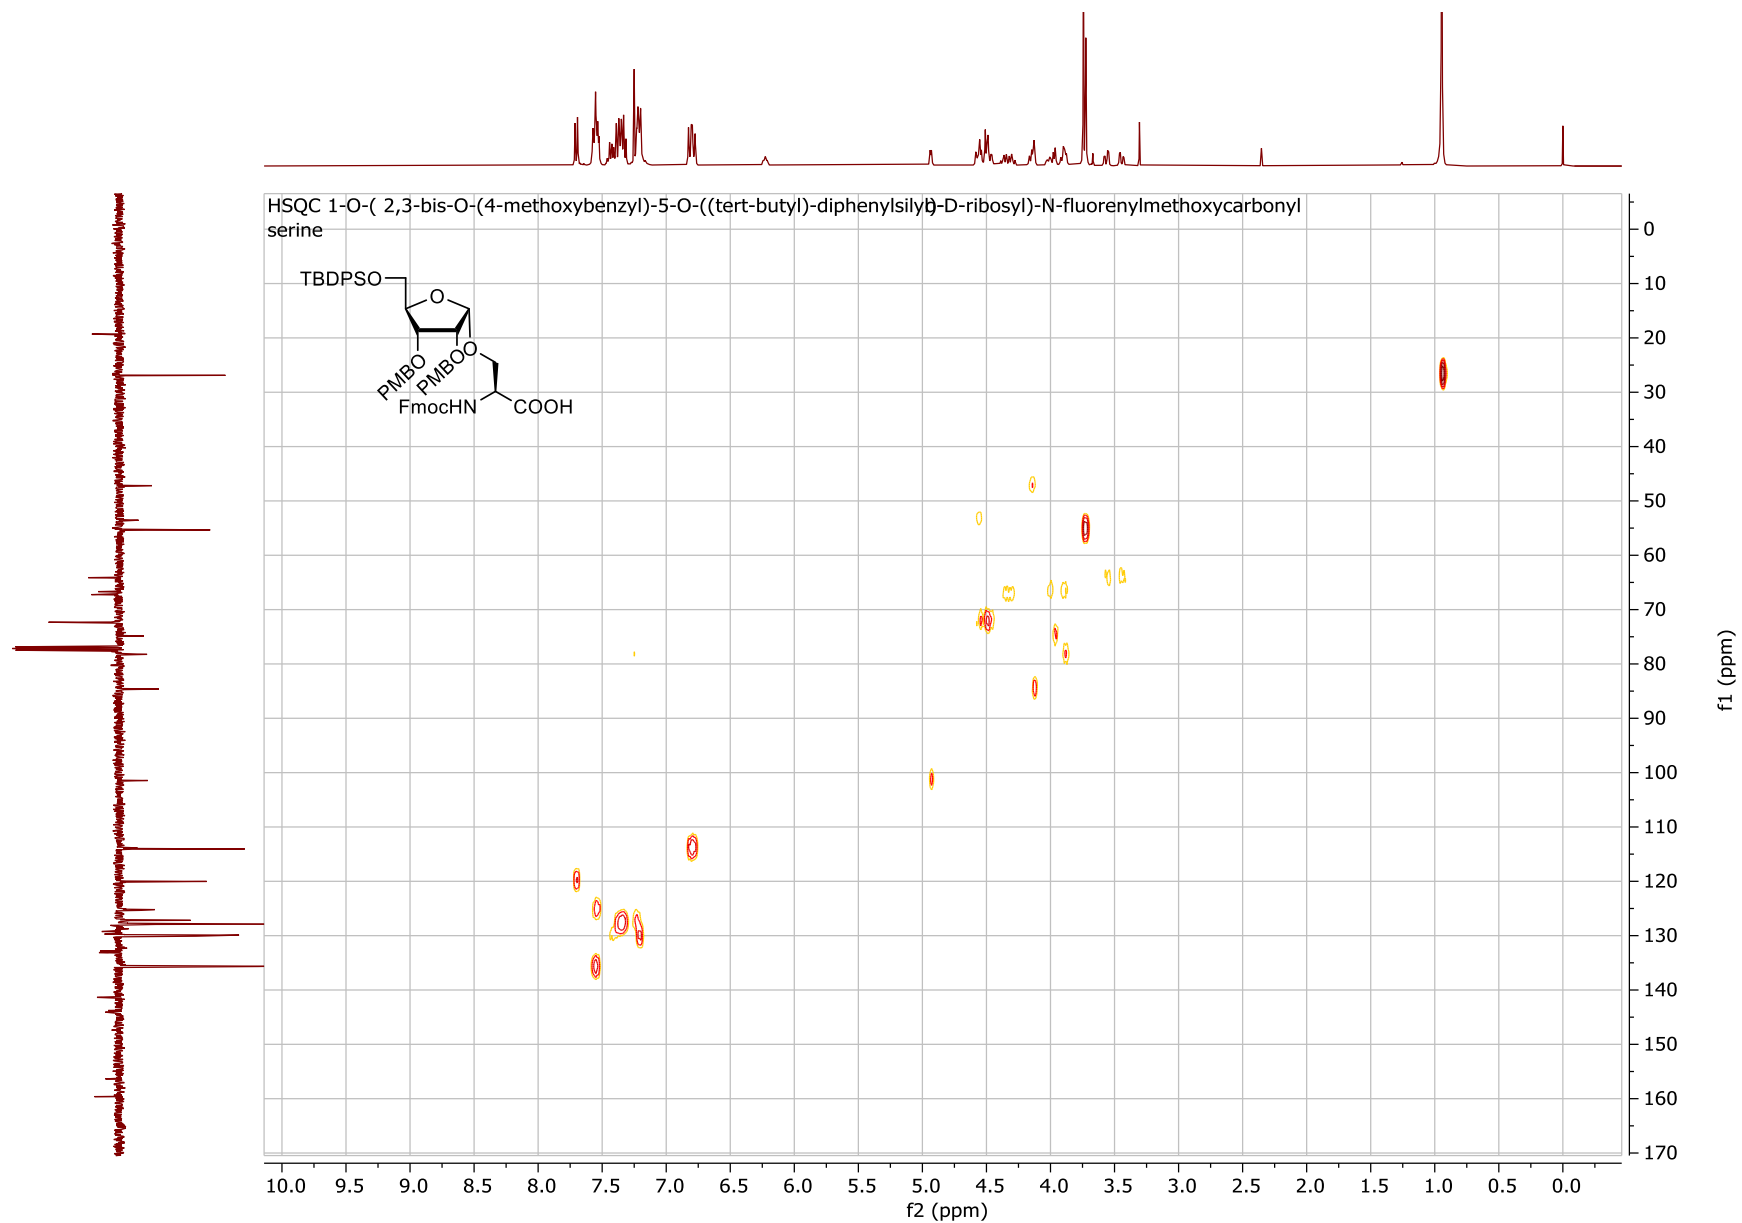





C-NMR 1-O-(2,3-bis-O-(4-methoxybenzyl)-5-O-((tert-butyl)-diphenylsilyl)-D-ribose)-N-fluorenylmethoxycarbonyl - threonine -

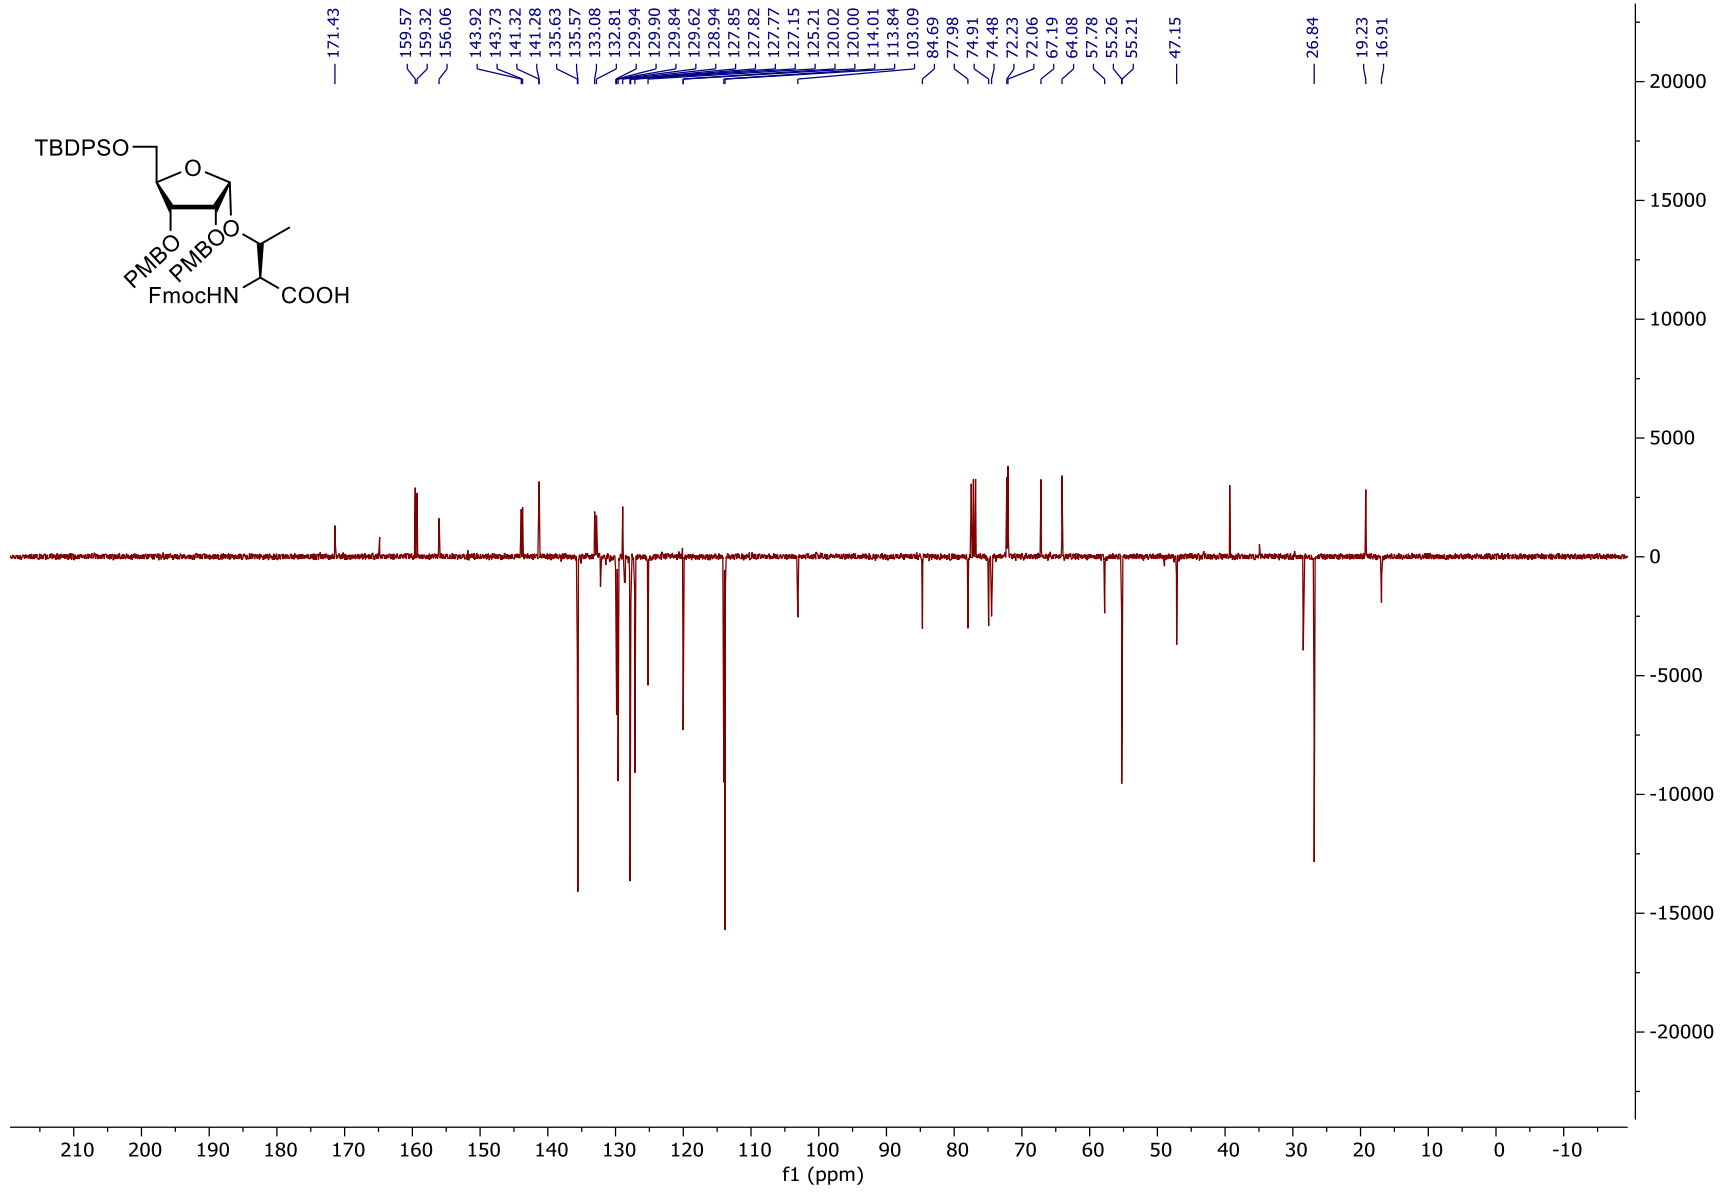



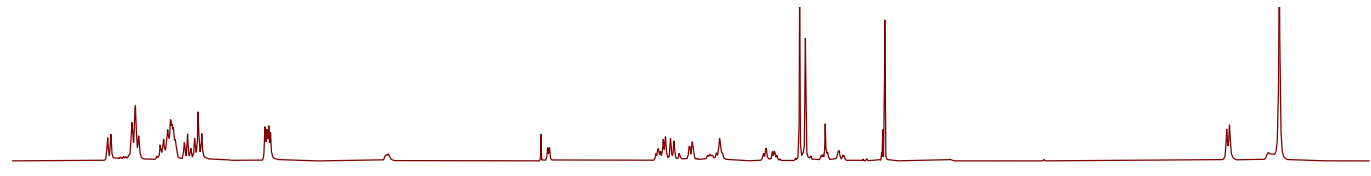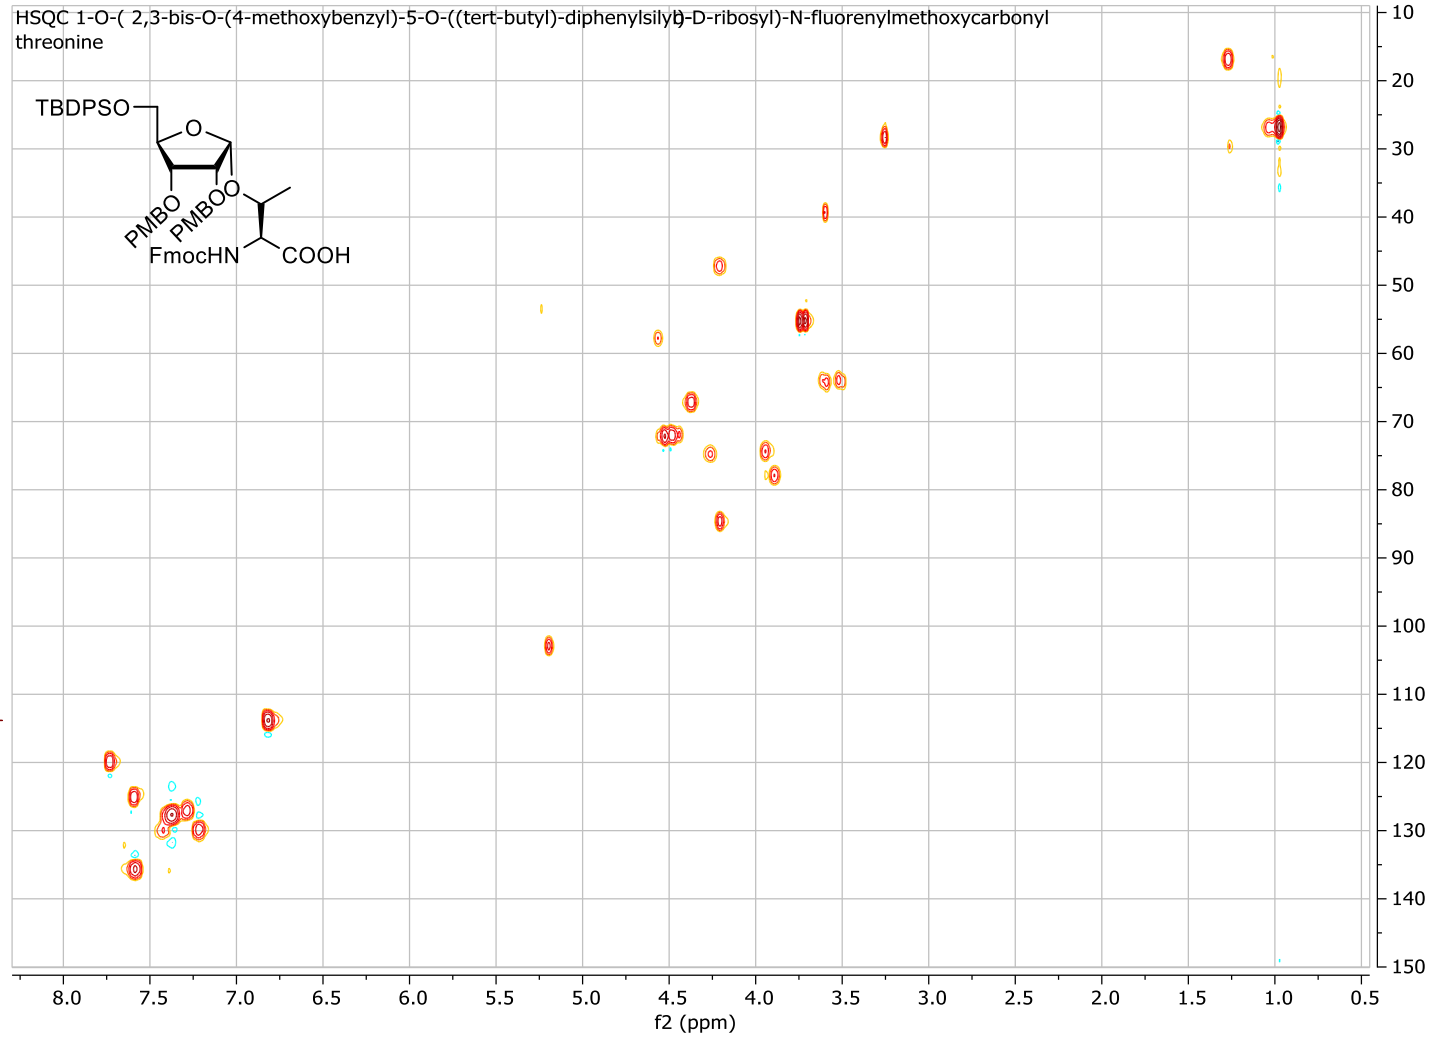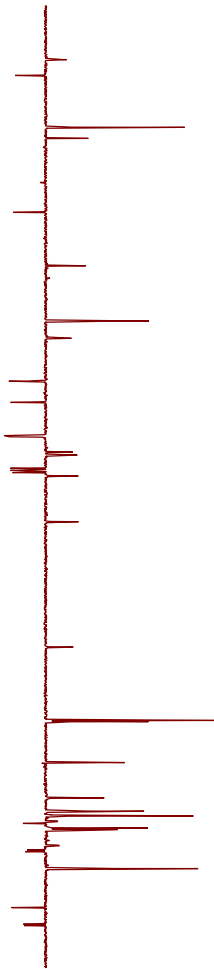

f1 (ppm)

f2 (ppm)

H-NMR 1-O-( 2,3-bis-O-(4-methoxybenzyl)-5-O-((tert-butyl)-diphenylsilyl)-D-ribose)-N-fluorenylmethoxycarbonyl — cysteine —

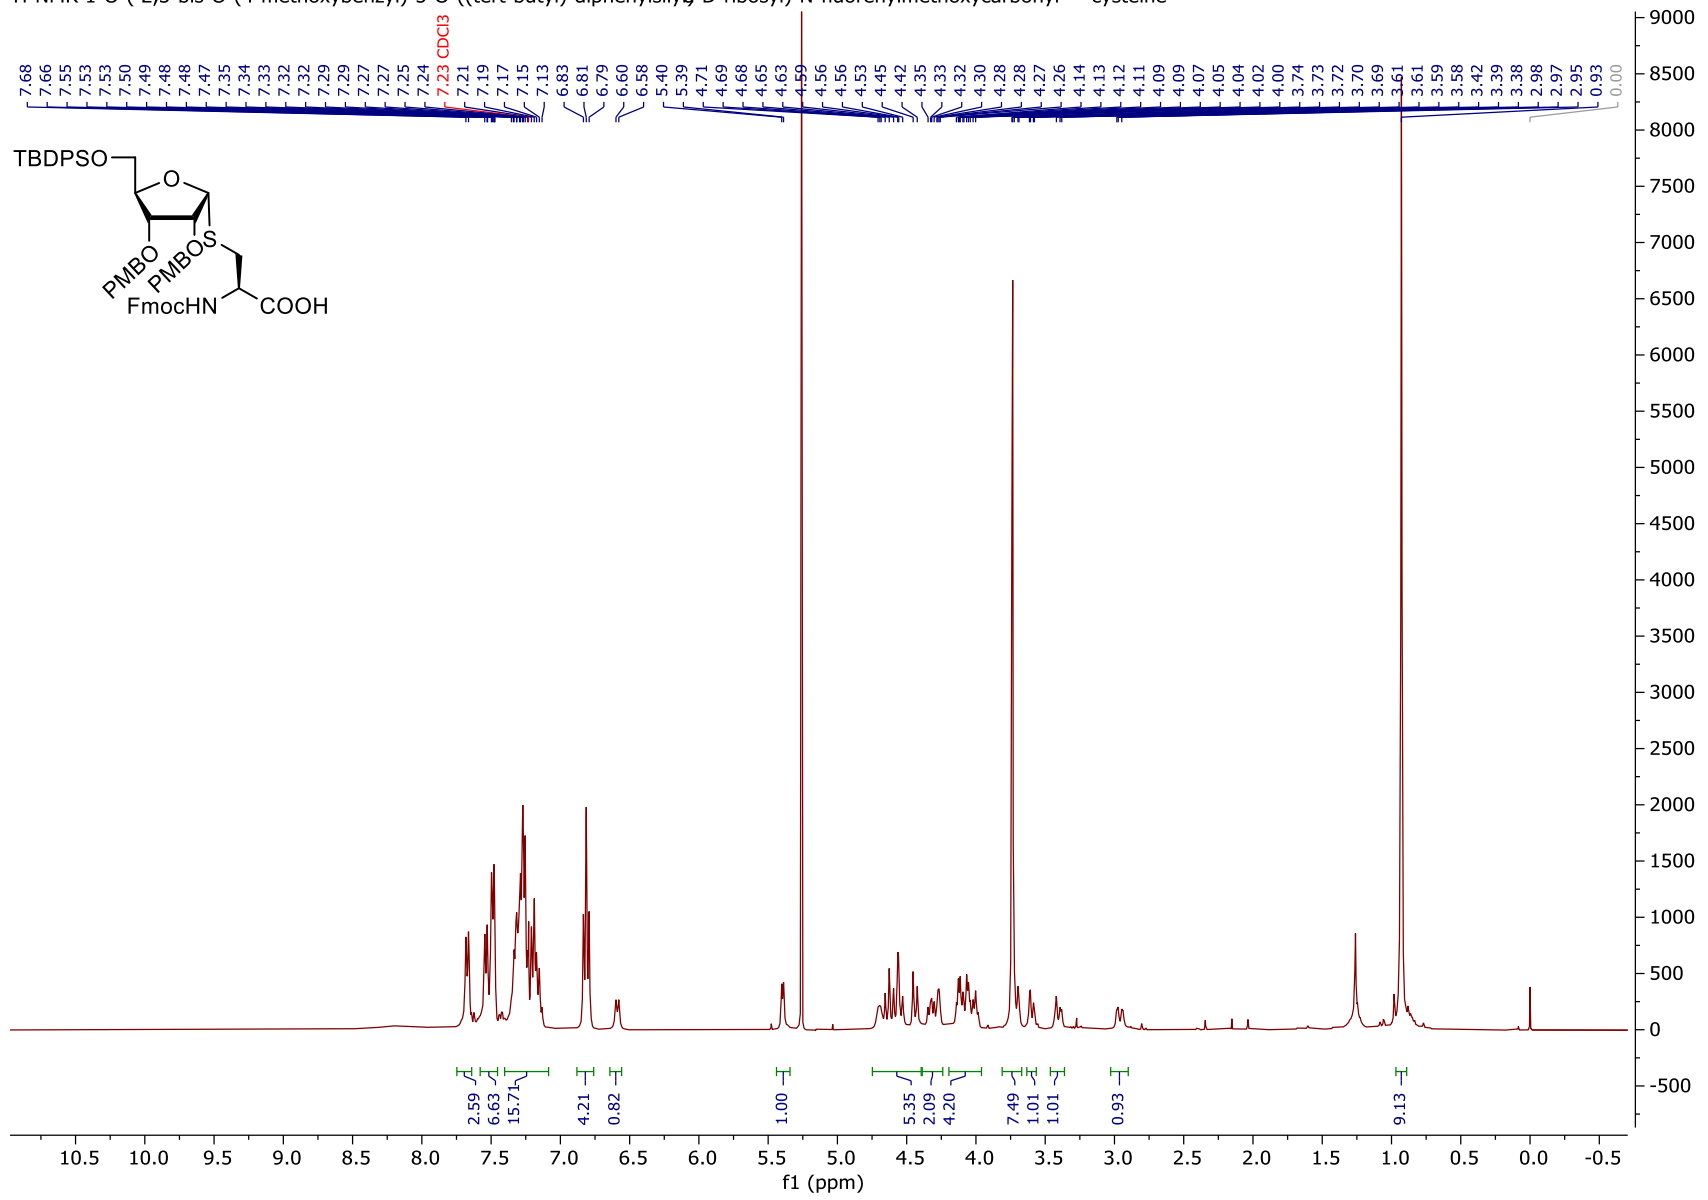

C-NMR 1-O-( 2,3-bis-O-(4-methoxybenzyl)-5-O-((tert-butyl)-diphenylsilyl)-D-ribose)-N-fluorenylmethoxycarbonyl — cysteine —

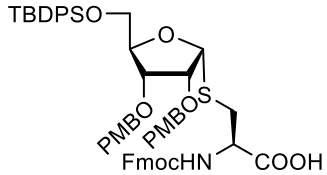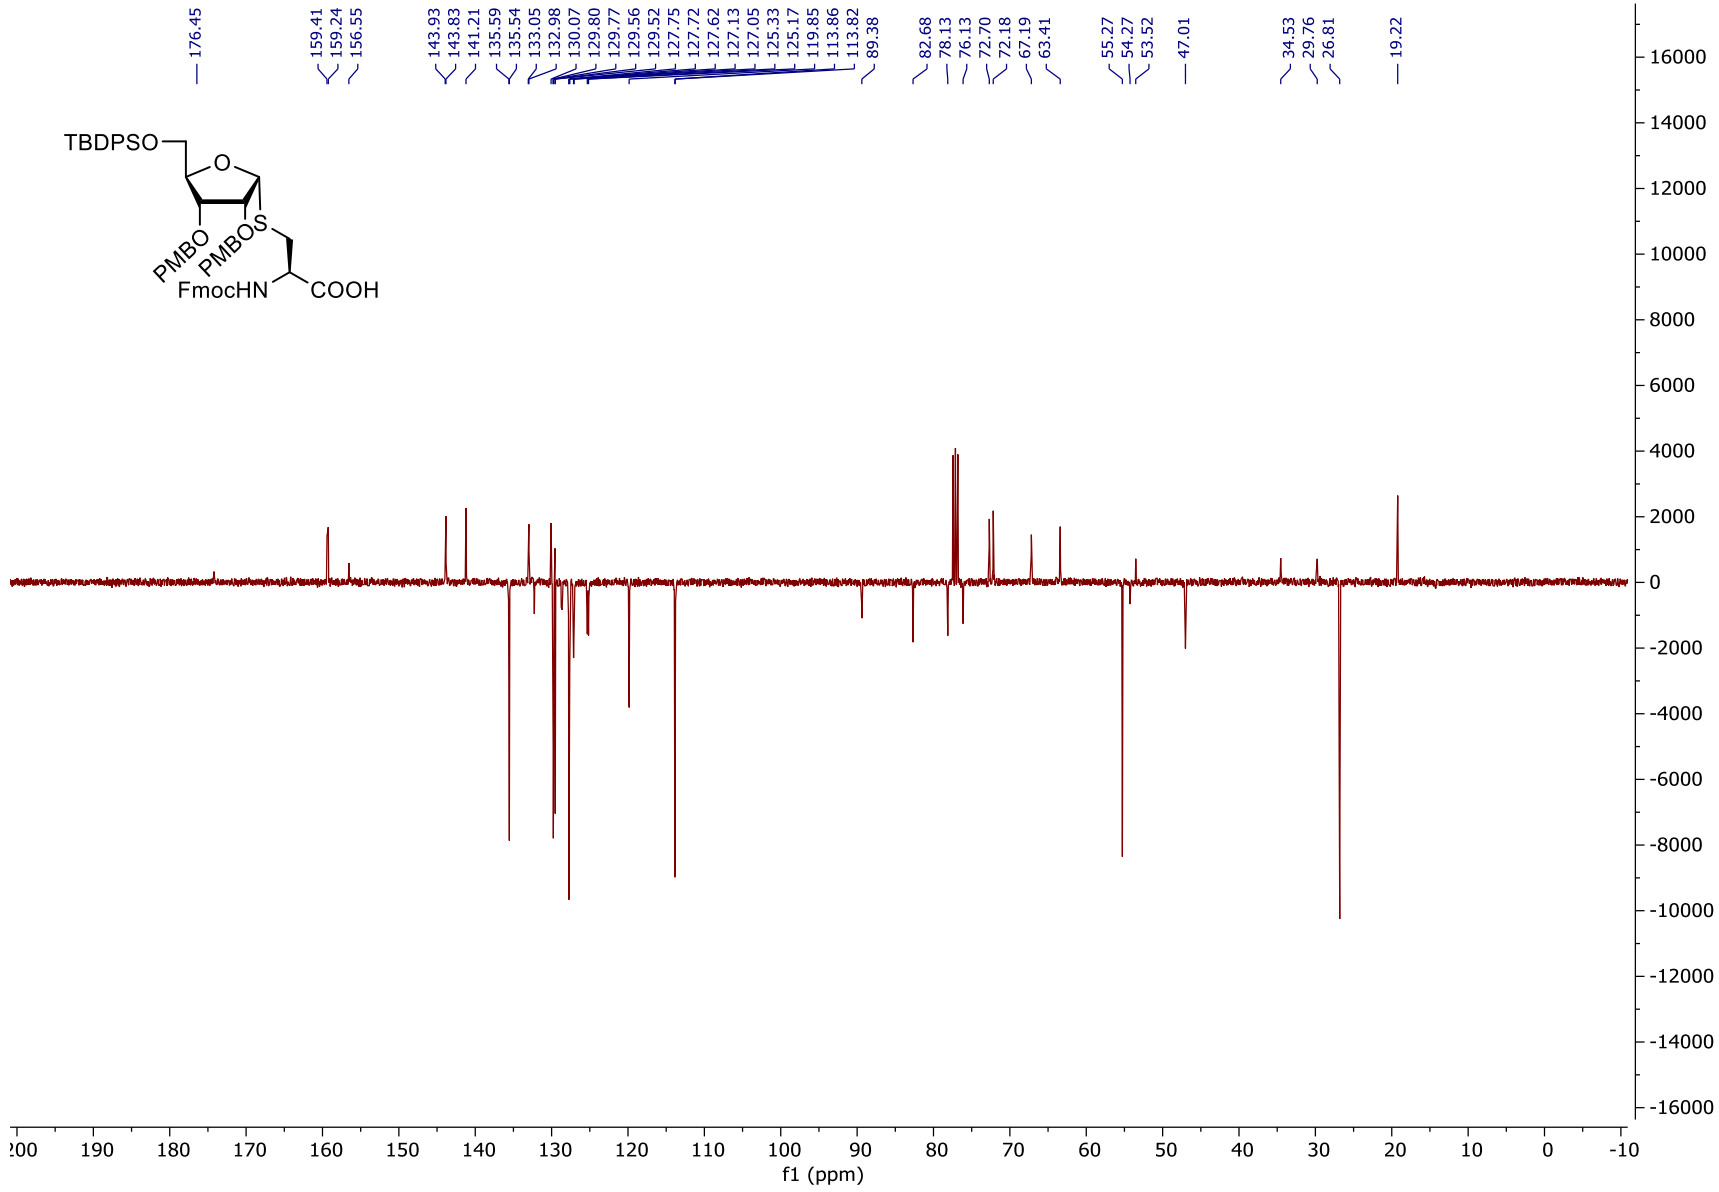

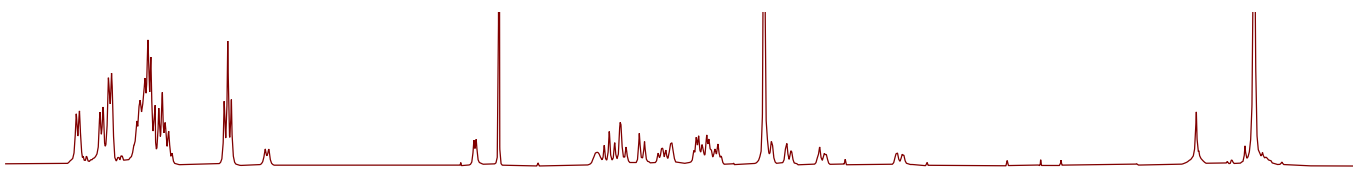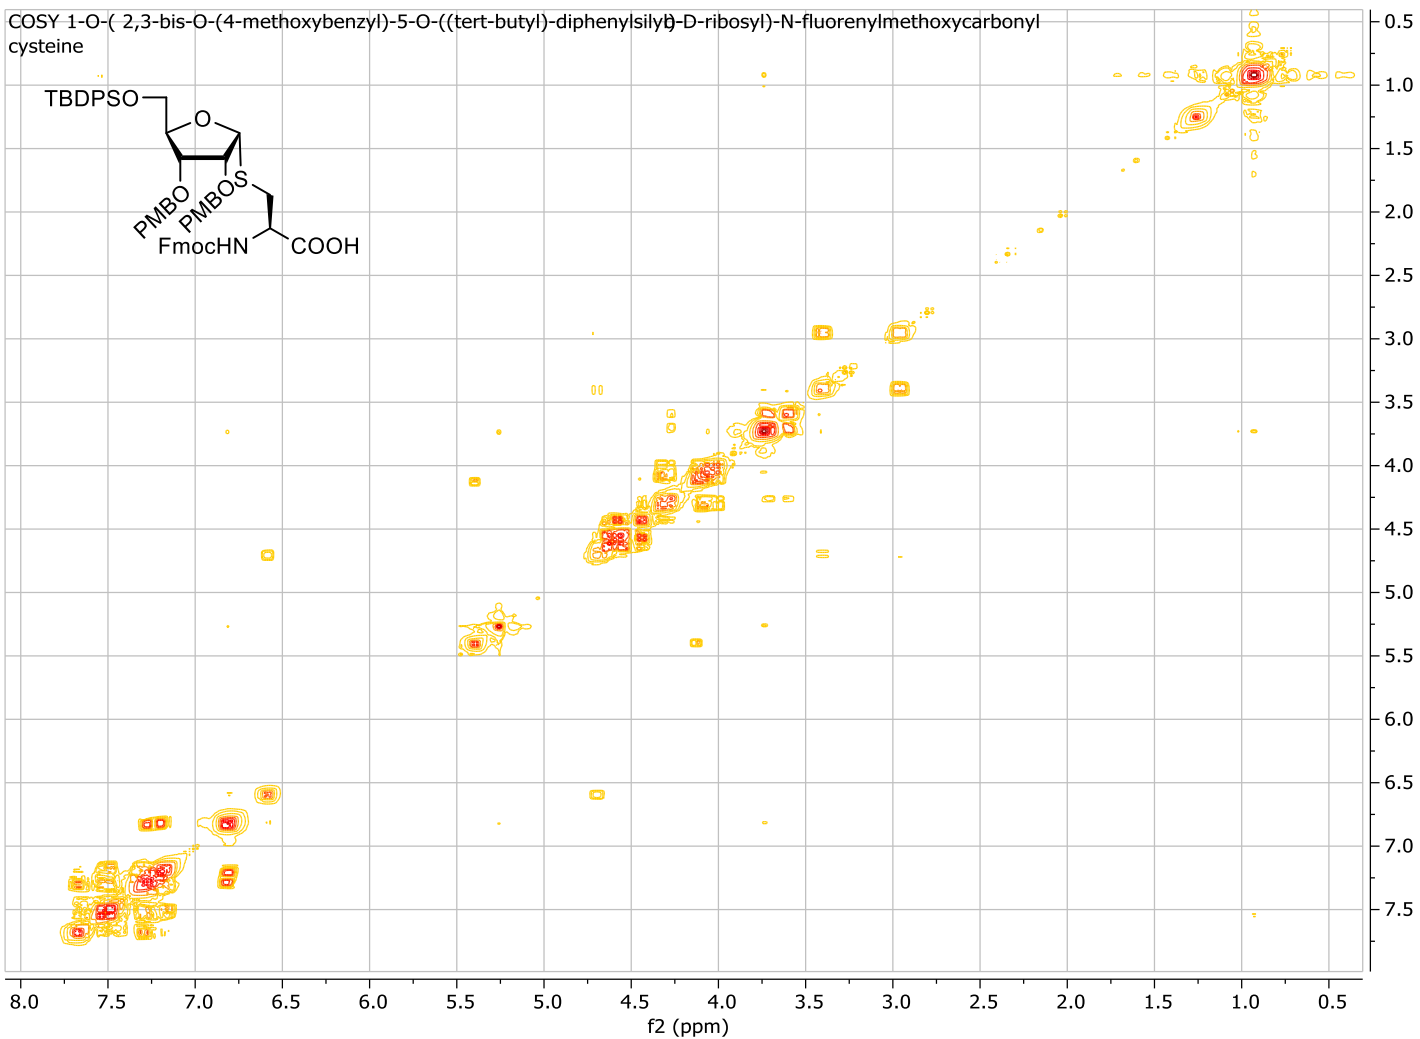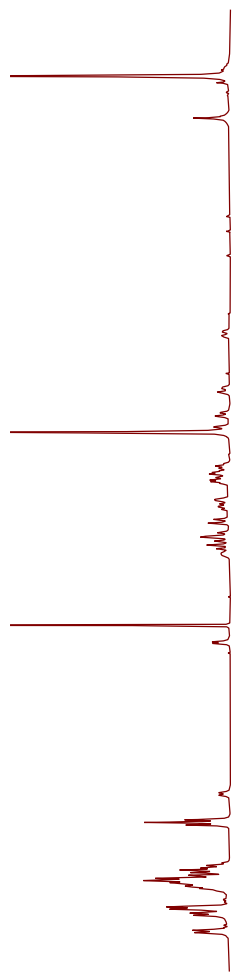

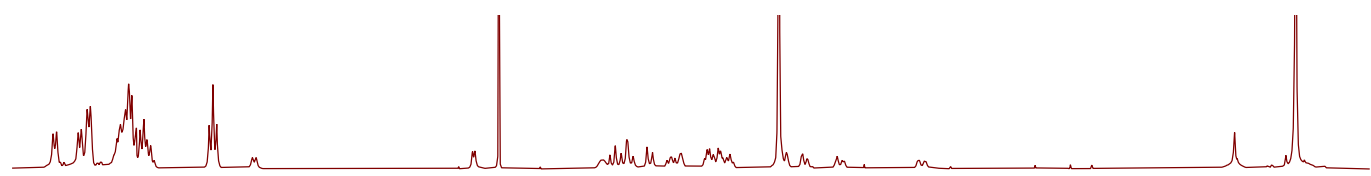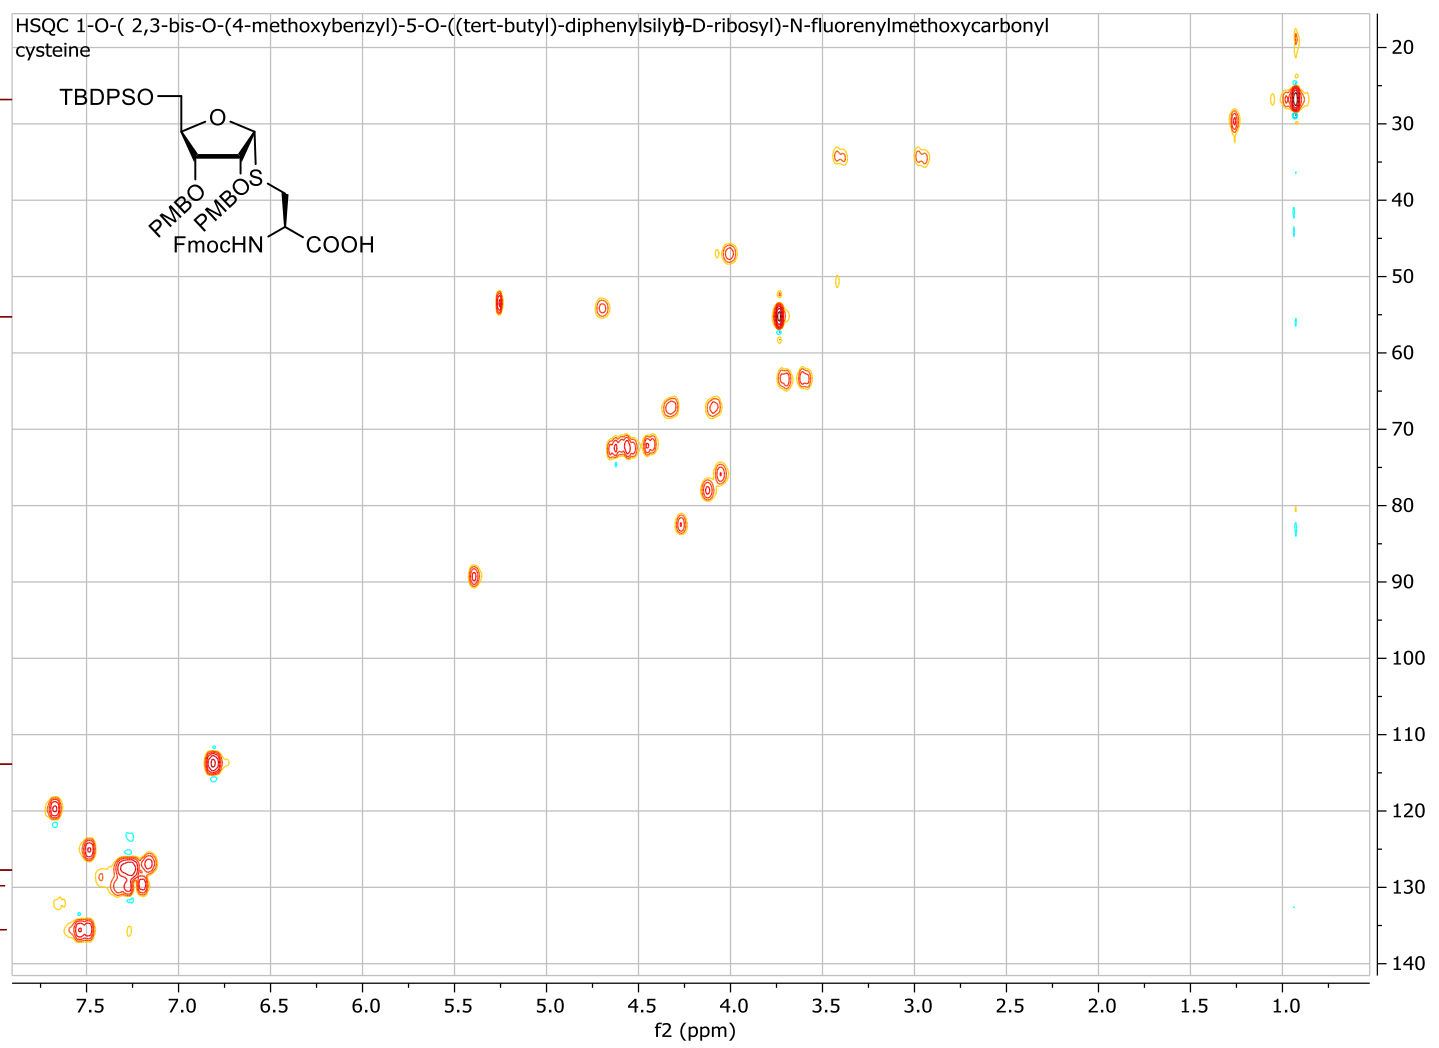

H-NMR 5'-O-(N6-tert-butylloxycarbonyl-2',3'-di-O-tert-butylidimethylsilyladenosine)-2-cyanoethyl-N-N-diisopropylphosphoramidite

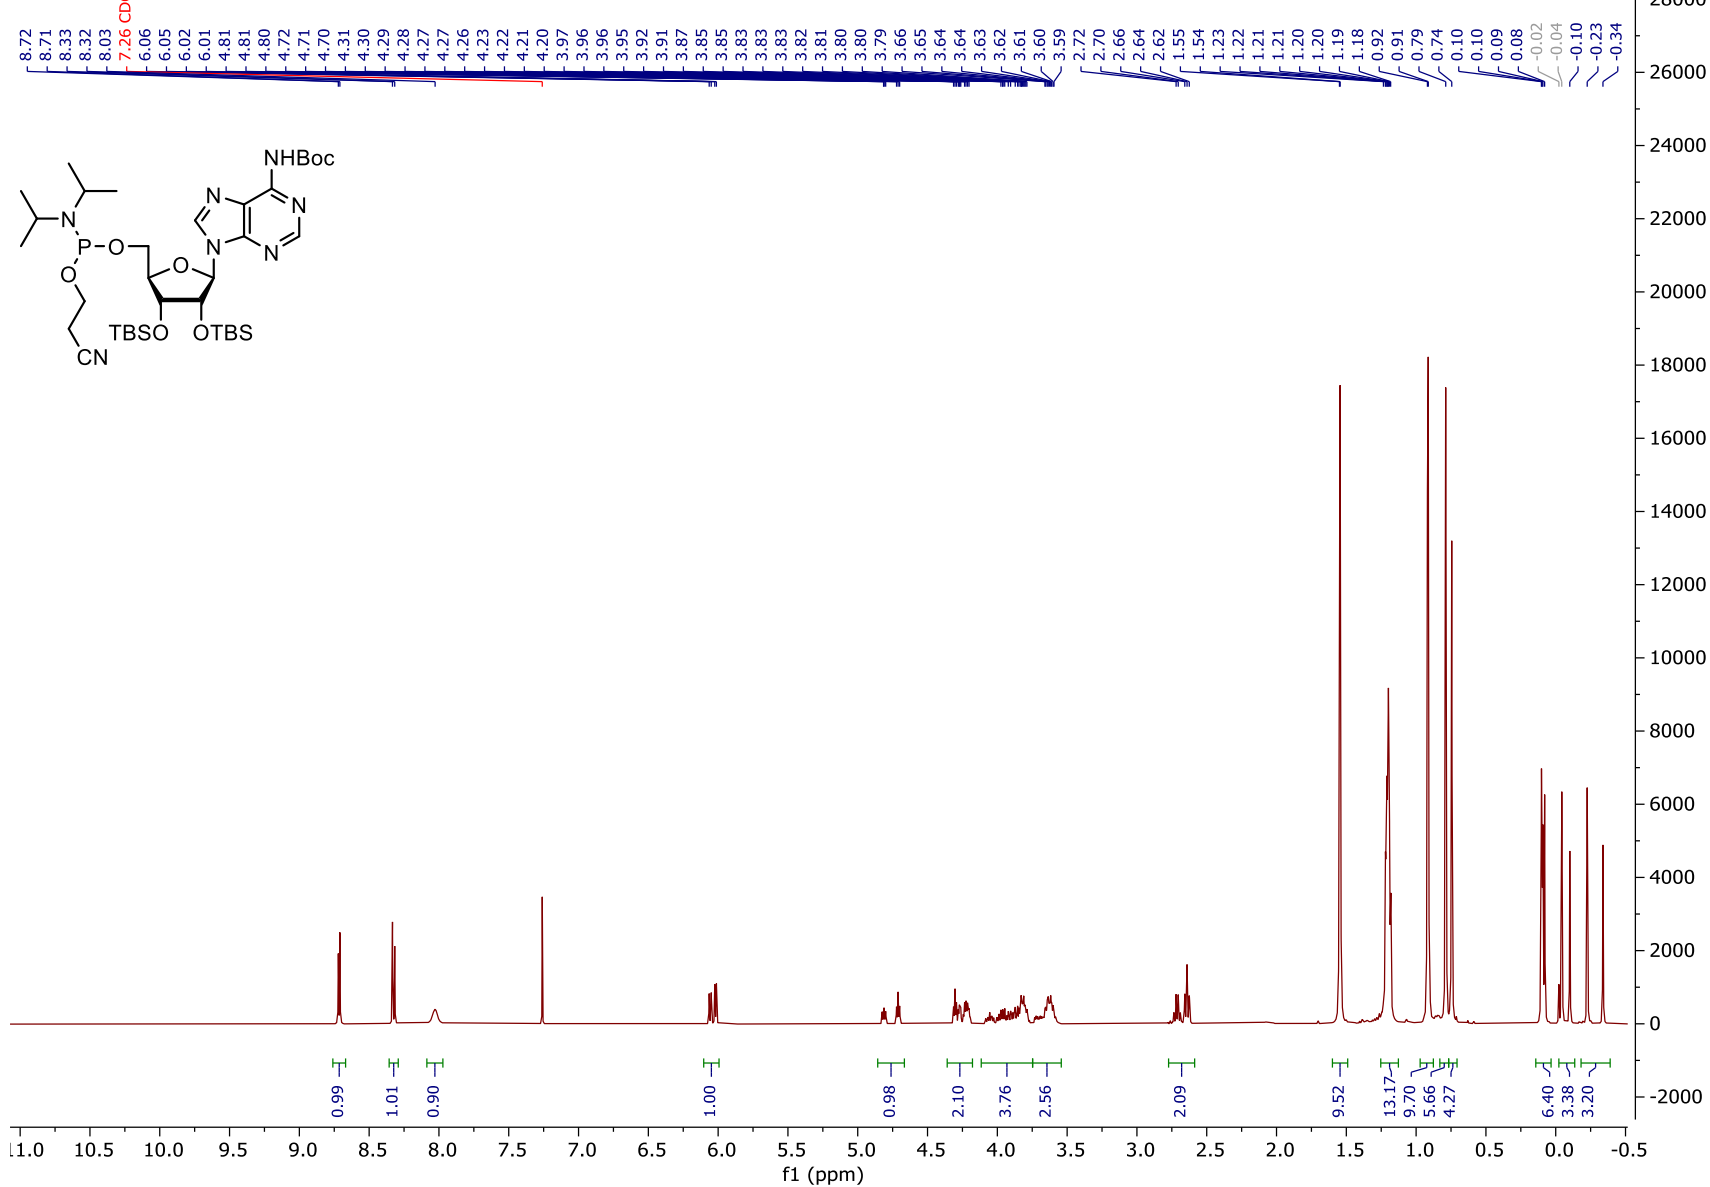



C-NMR 5'-O-(N6-tert-butyloxycarbonyl-2',3'-di-O-tert-butylidimethylsilyladenosine)-2-cyanoethyl-N-N-diisopropylphosphoramidite

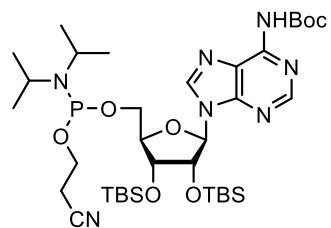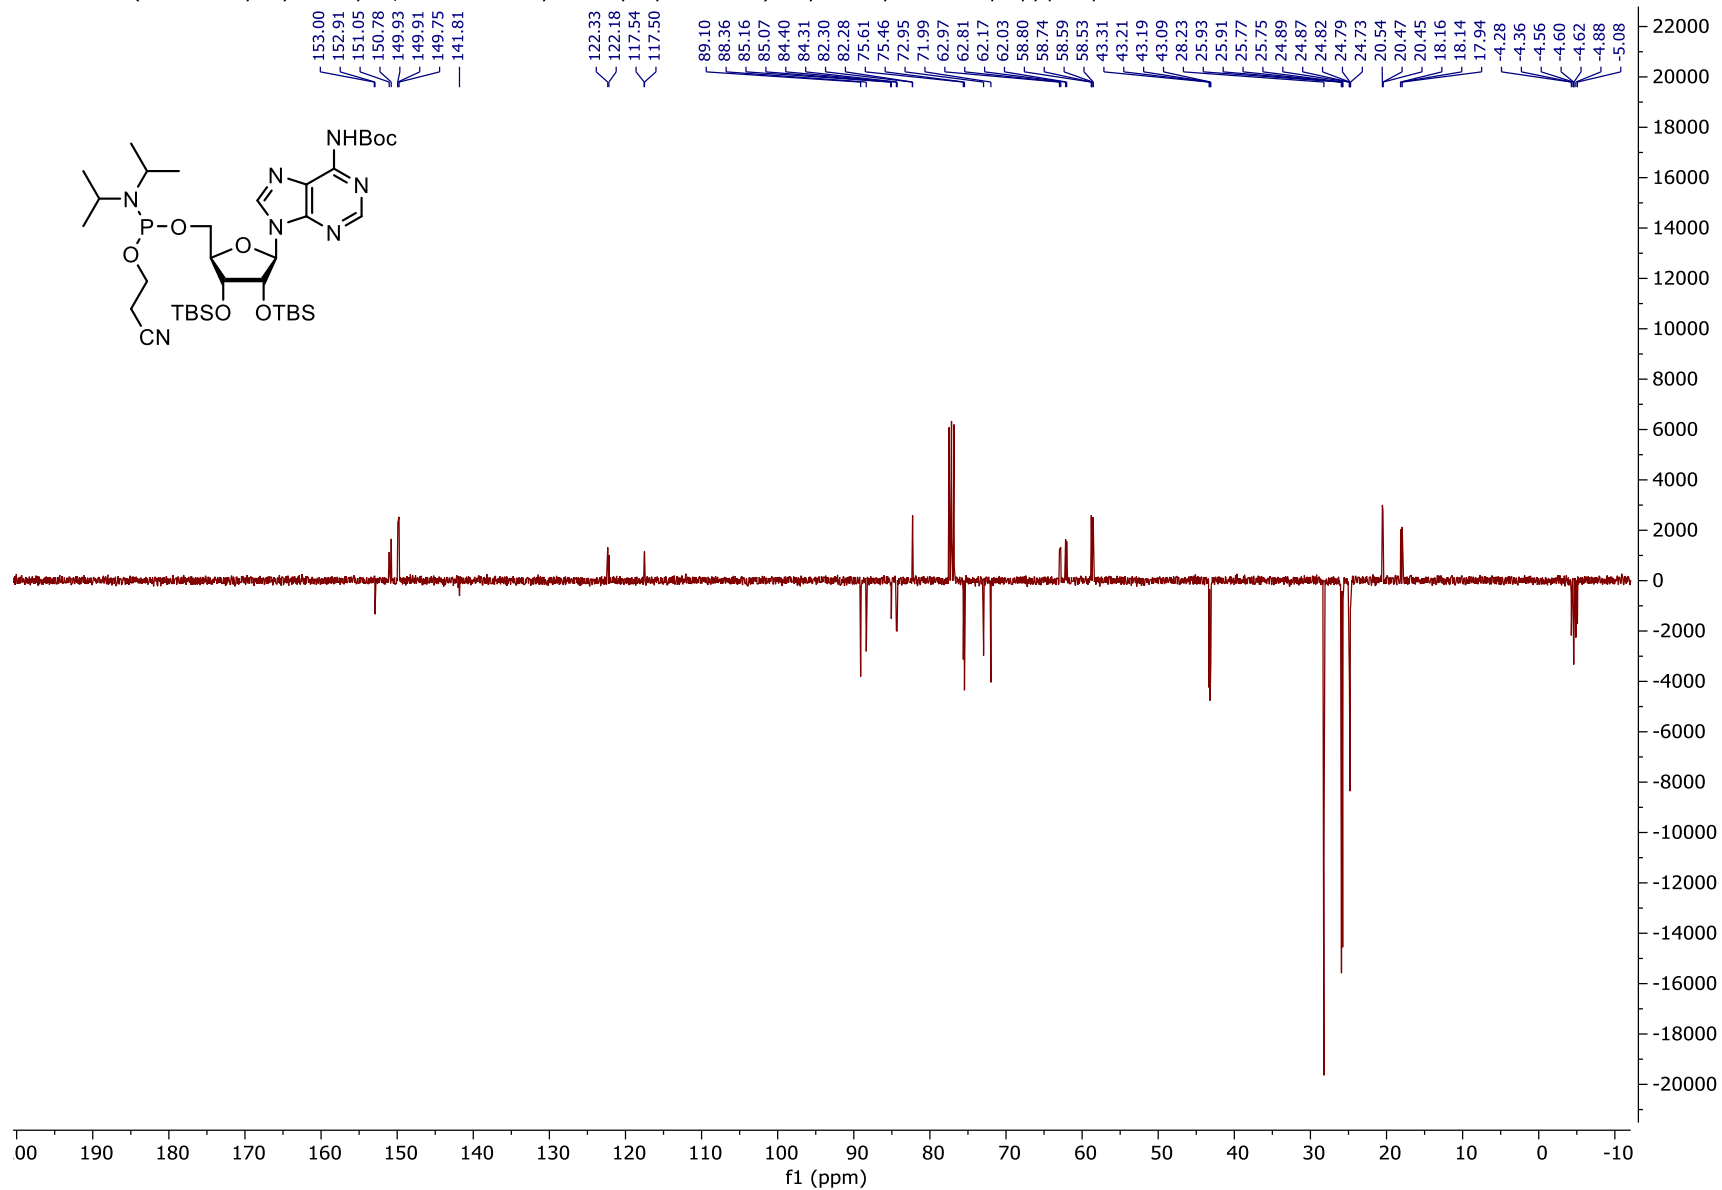

P-NMR 5'-O-(N6-tert-butyloxycarbonyl-2',3'-di-O-tert-butylidimethylsilyl-adenosine)-2-cyanoethyl-N,N-diisopropylphosphoramidite

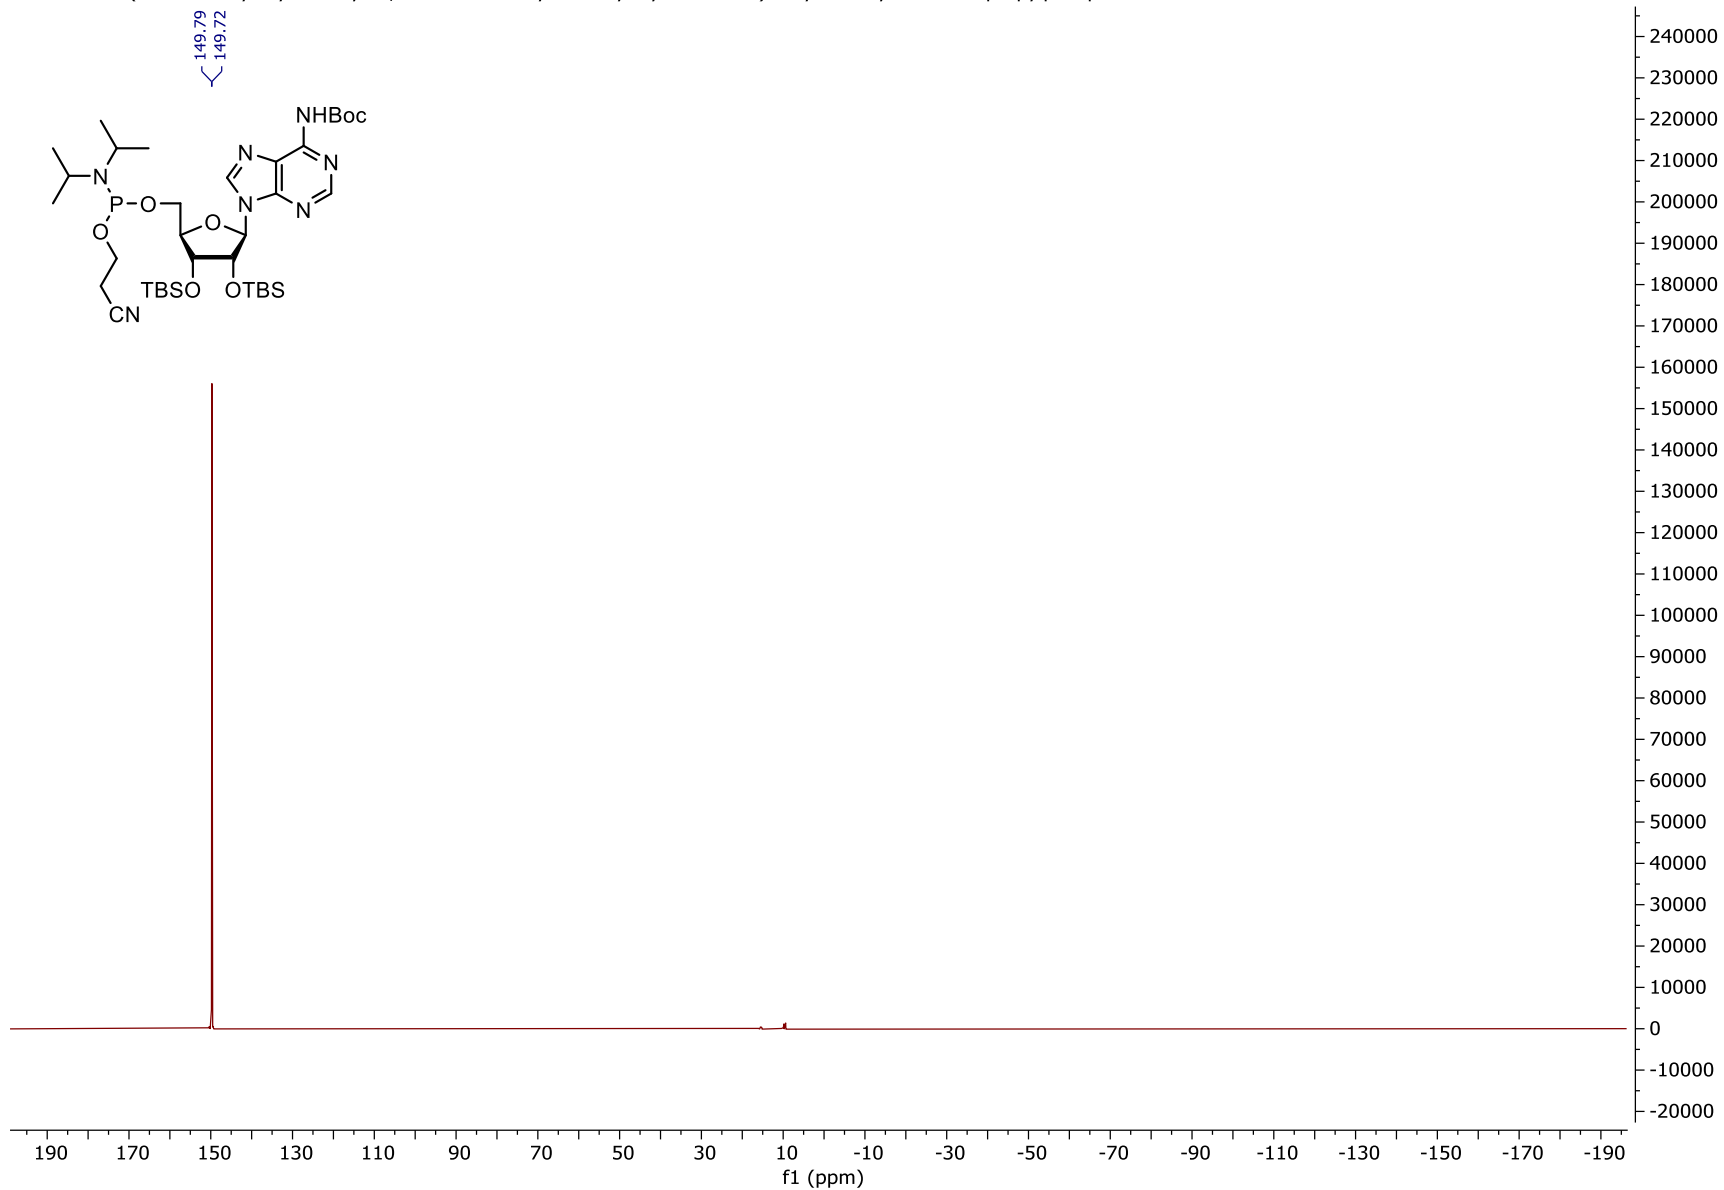

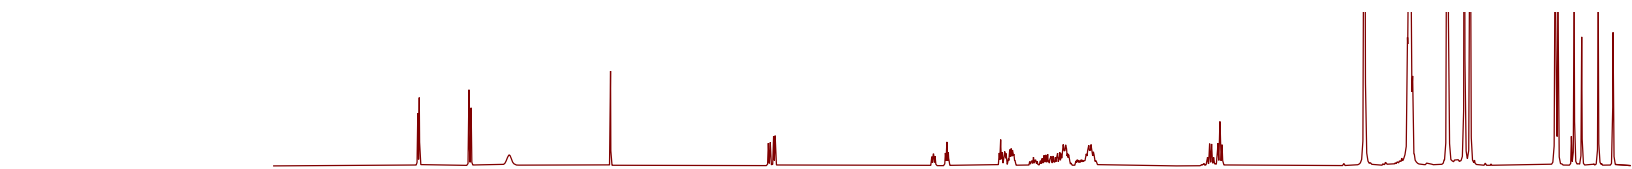

COSY 5'-O-(N6-tert-butylloxycarbonyl-2',3'-di-O-tert-butylidimethylsilyl)adenosine-2-cyanoethyl-N,N-diisopropylphosphoramidite

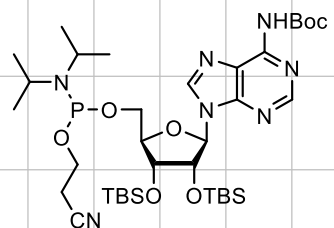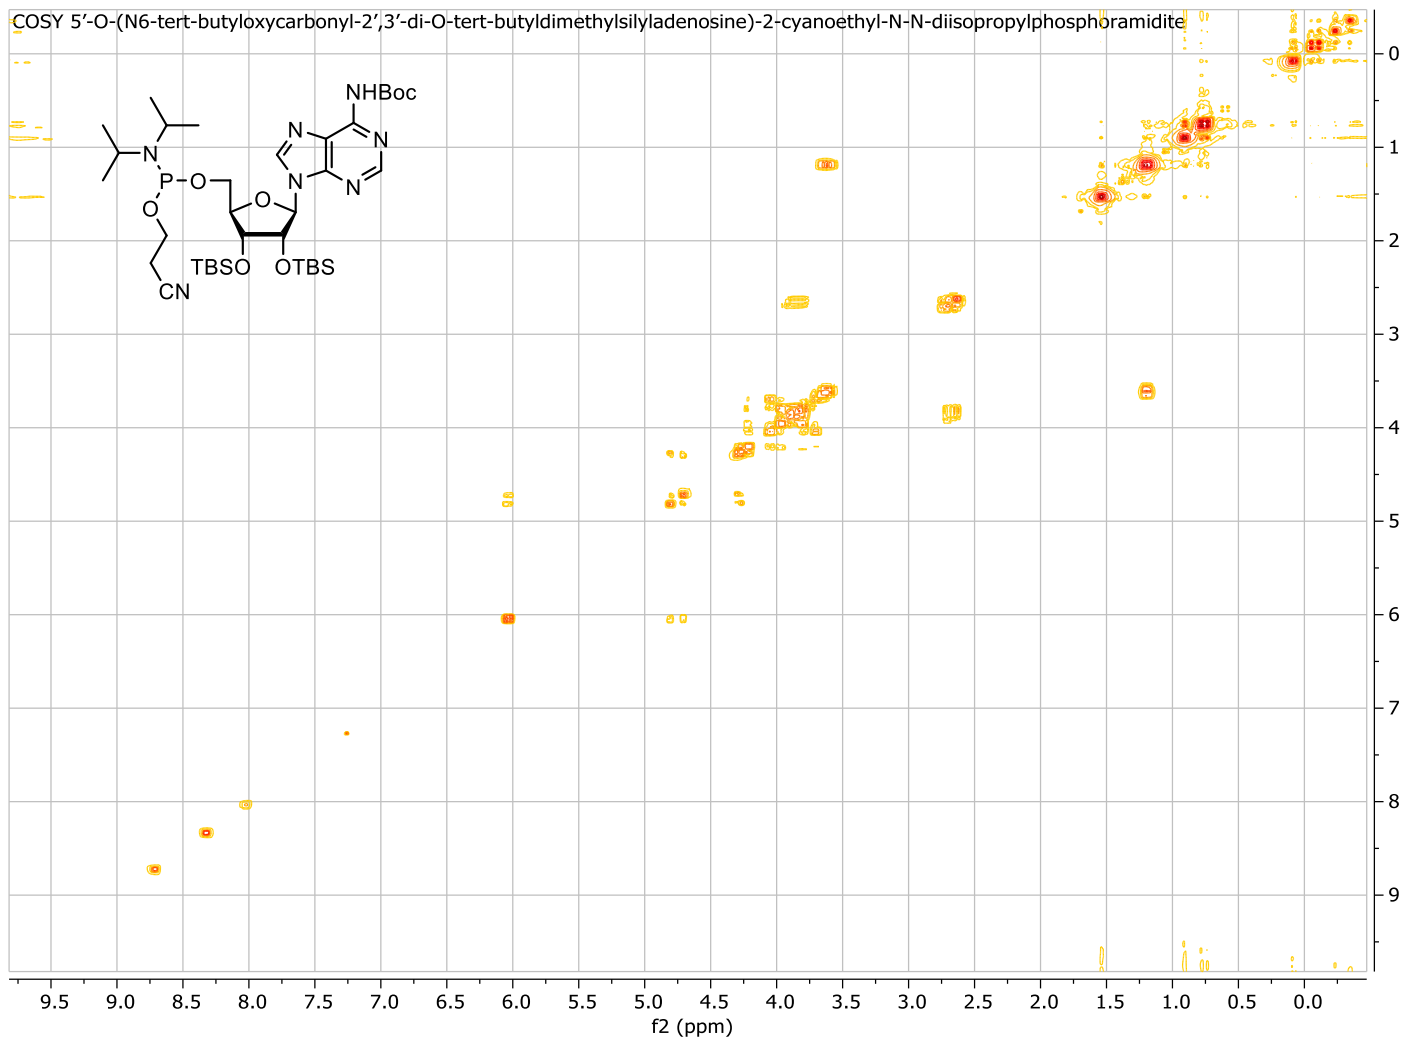

f1 (ppm)

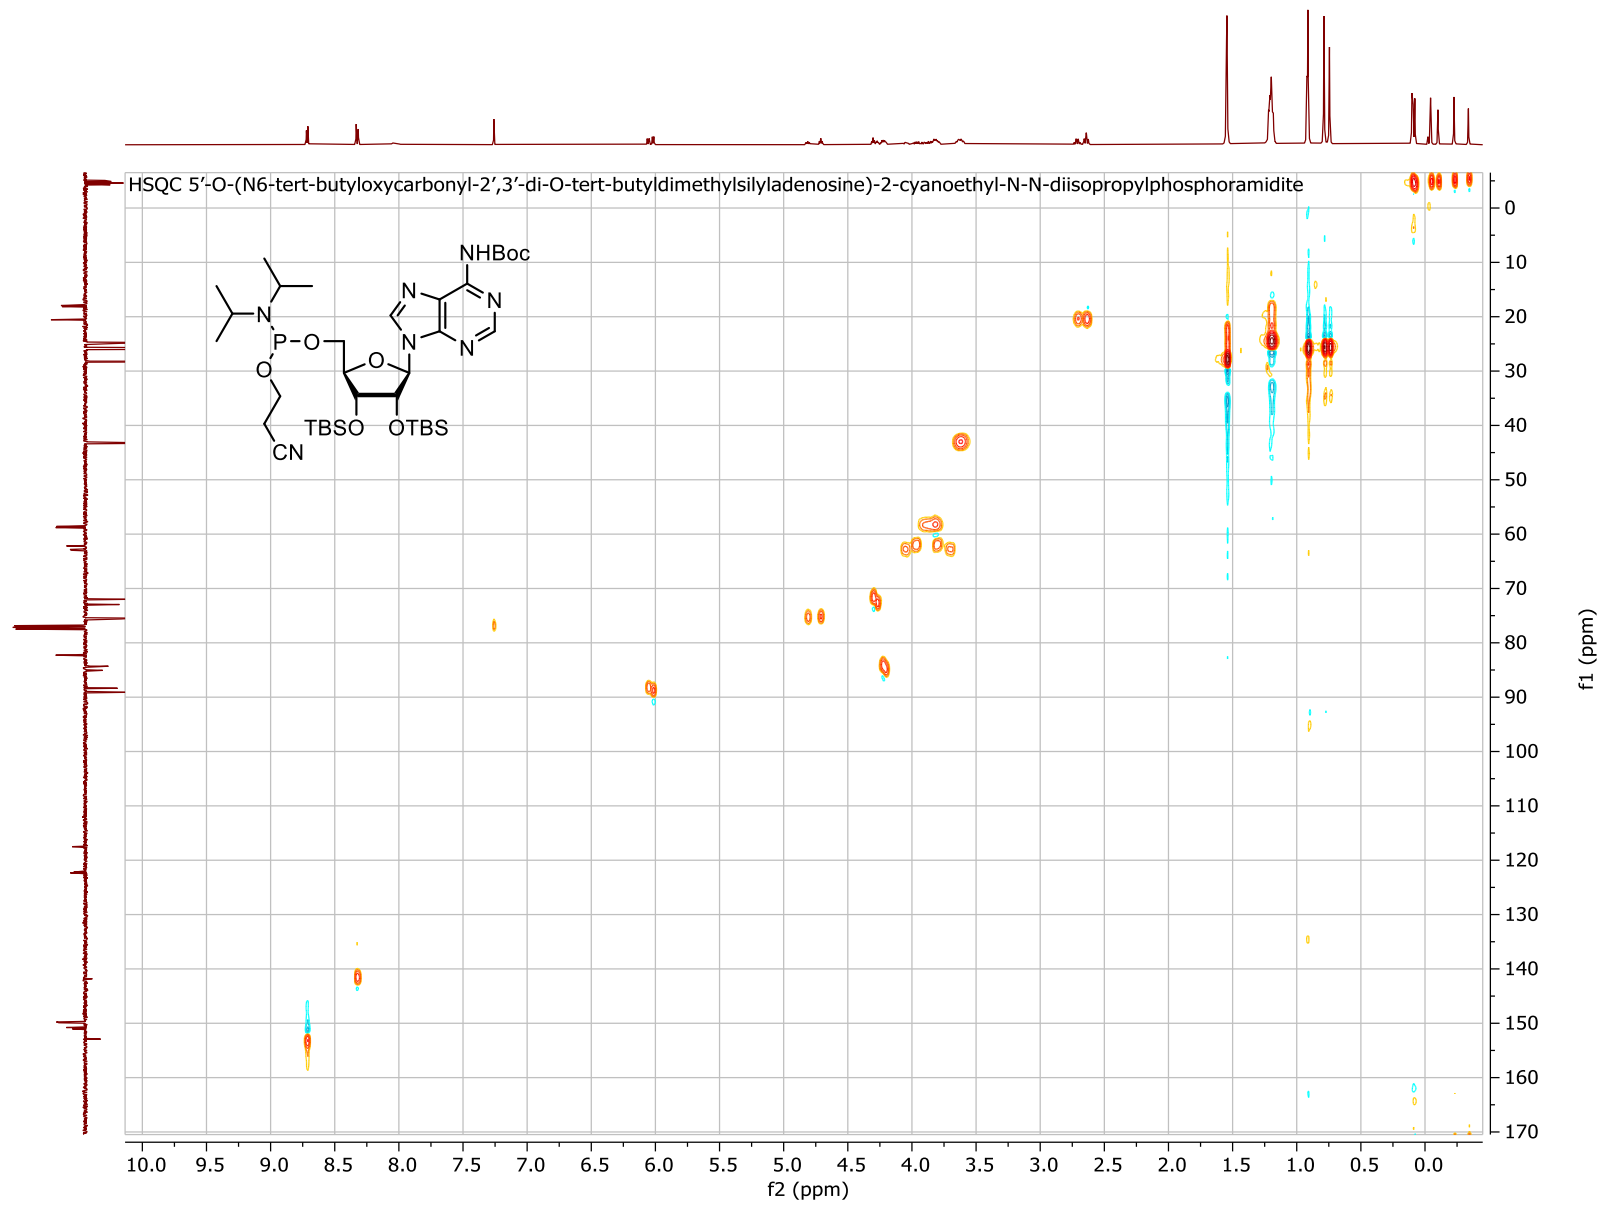

H-NMR Ac-PAKS(ADPr)APAPKKG-OH

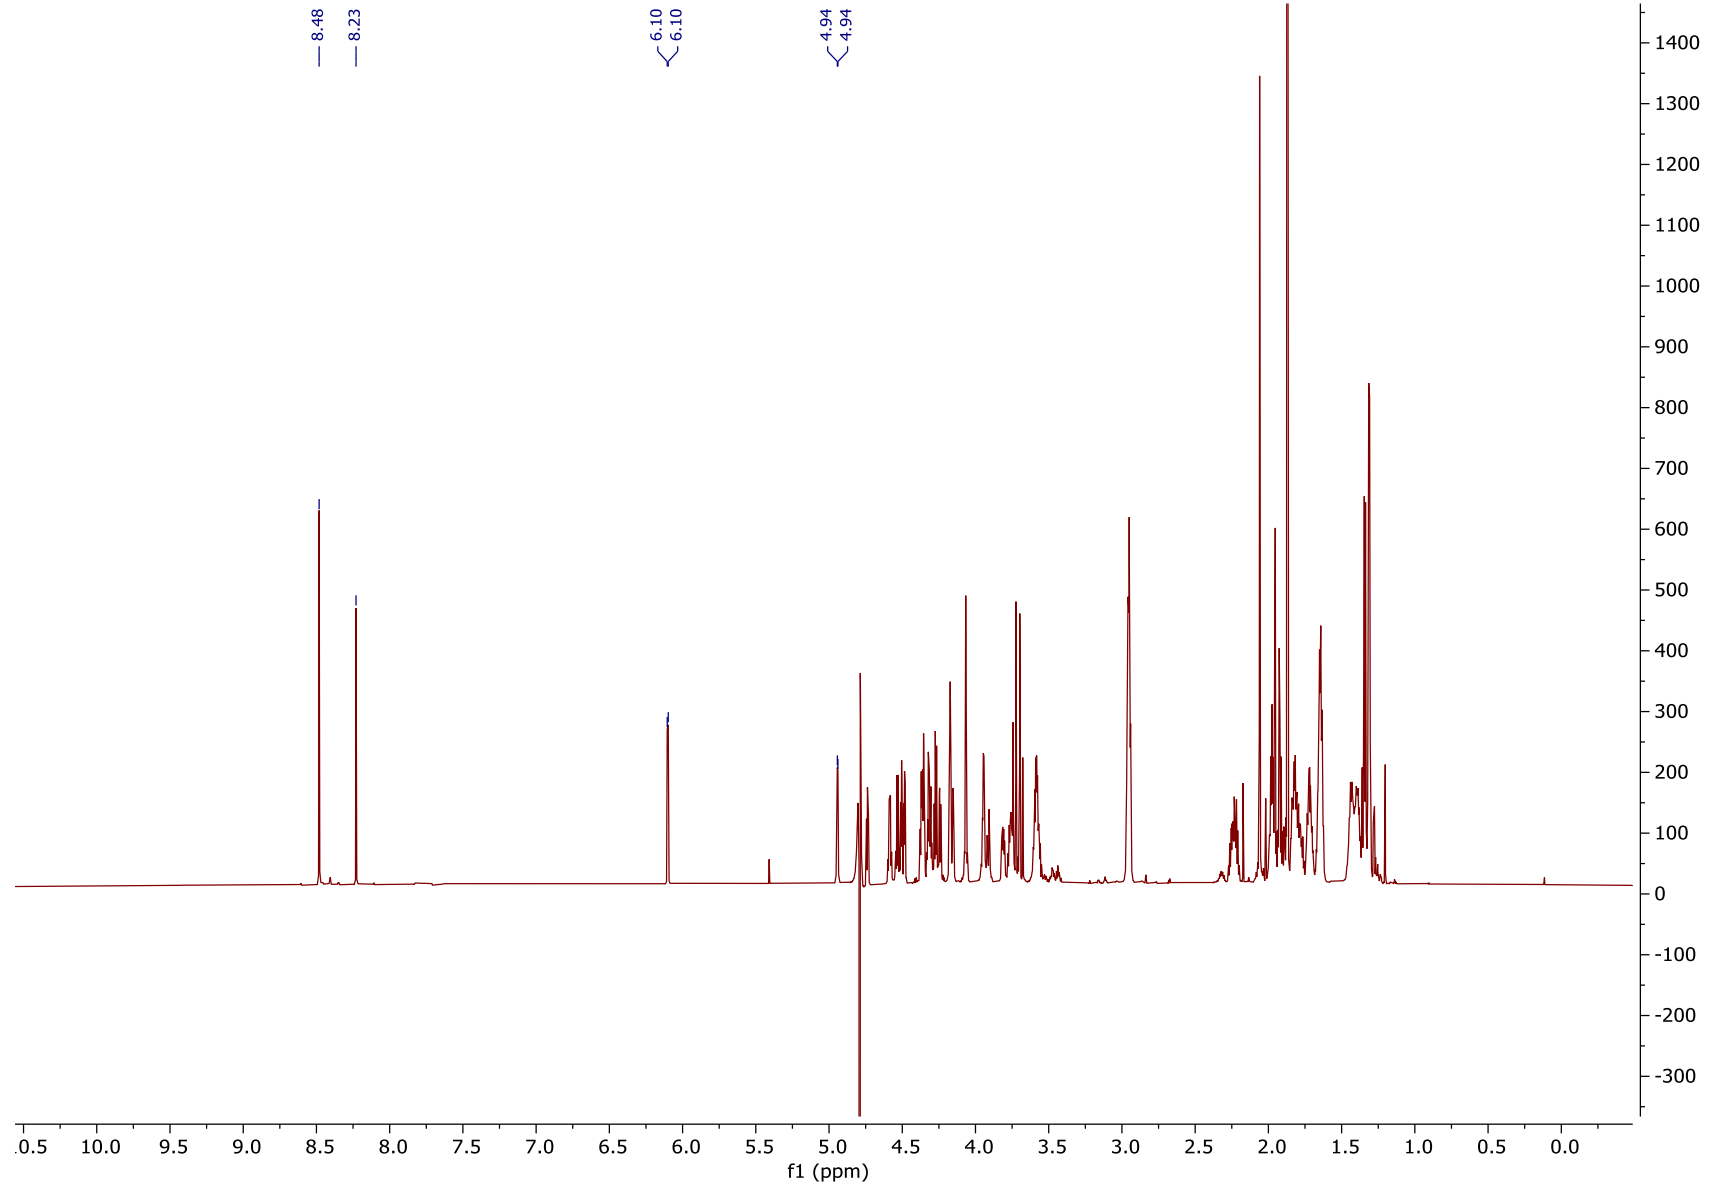

P-NMR PAKS(ADPr)APAPKKG-OH + EDTA

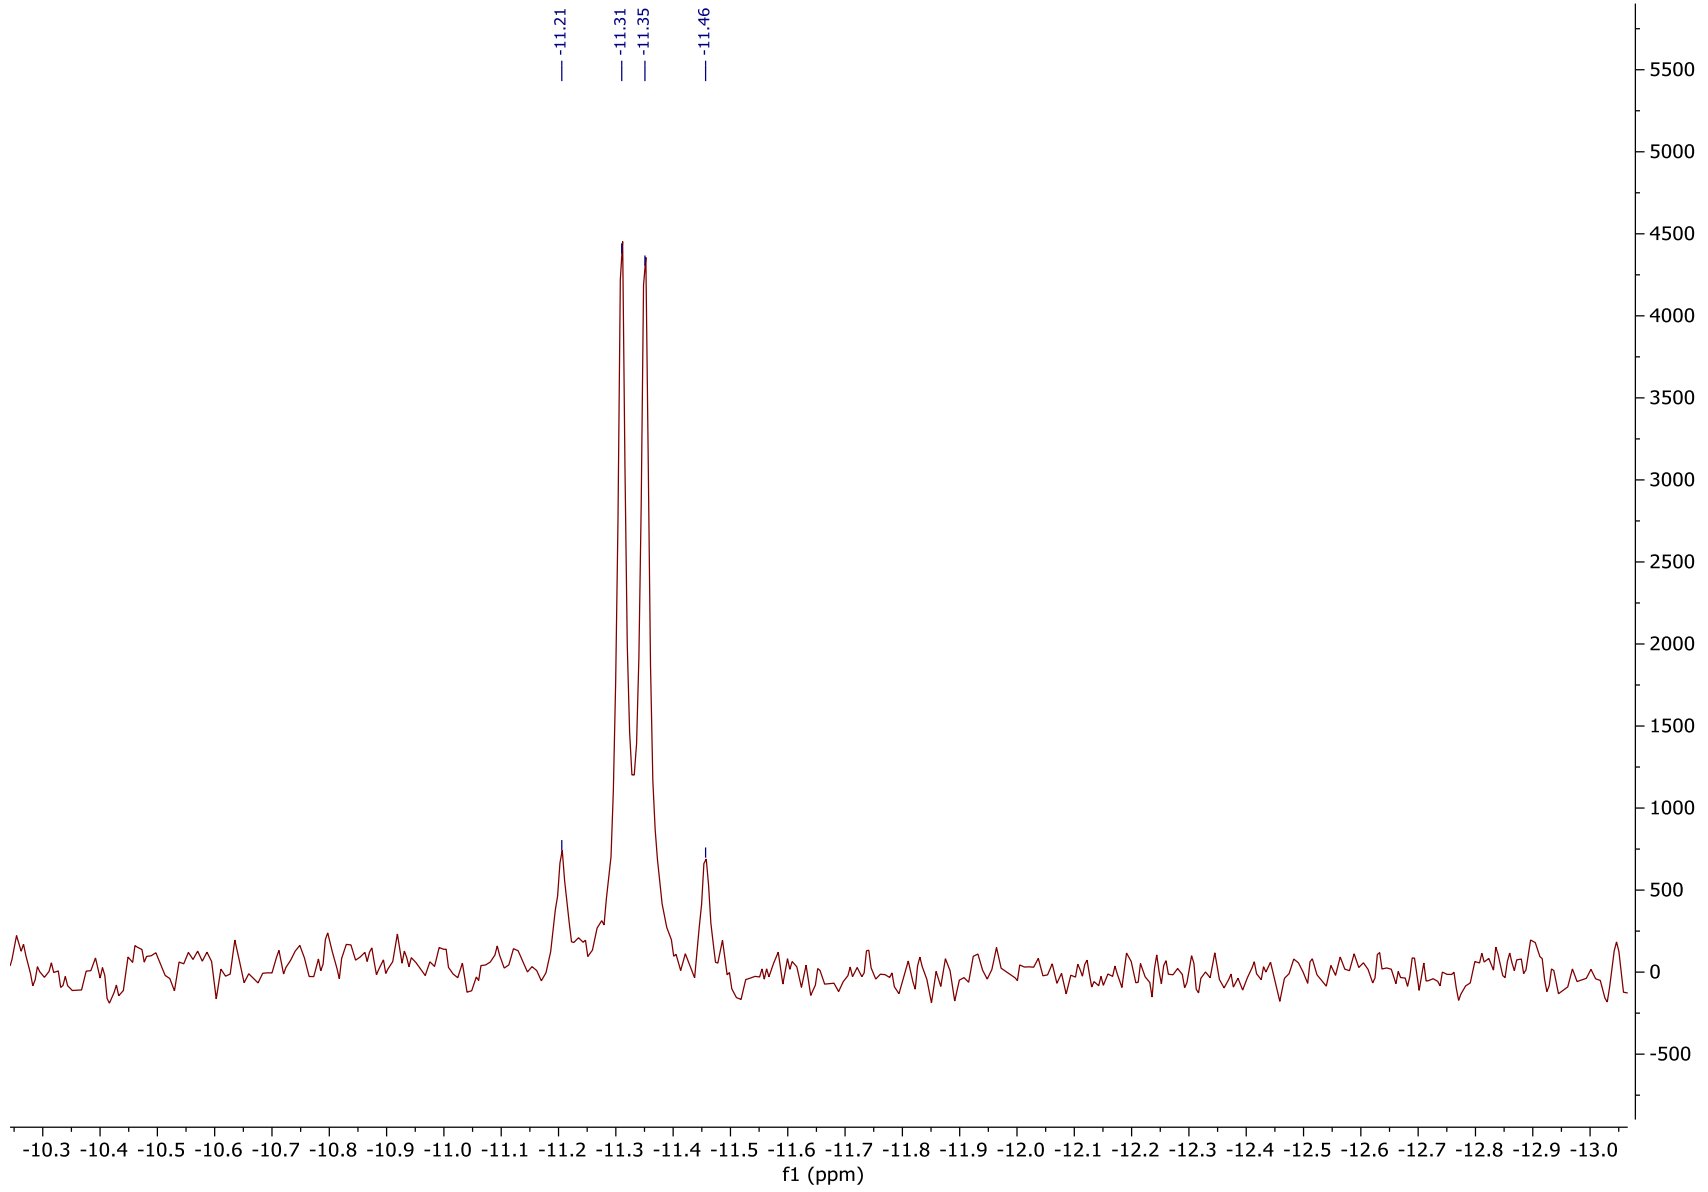

H-NMR Ac-GKS(ADPr)GAALSKKG-OH

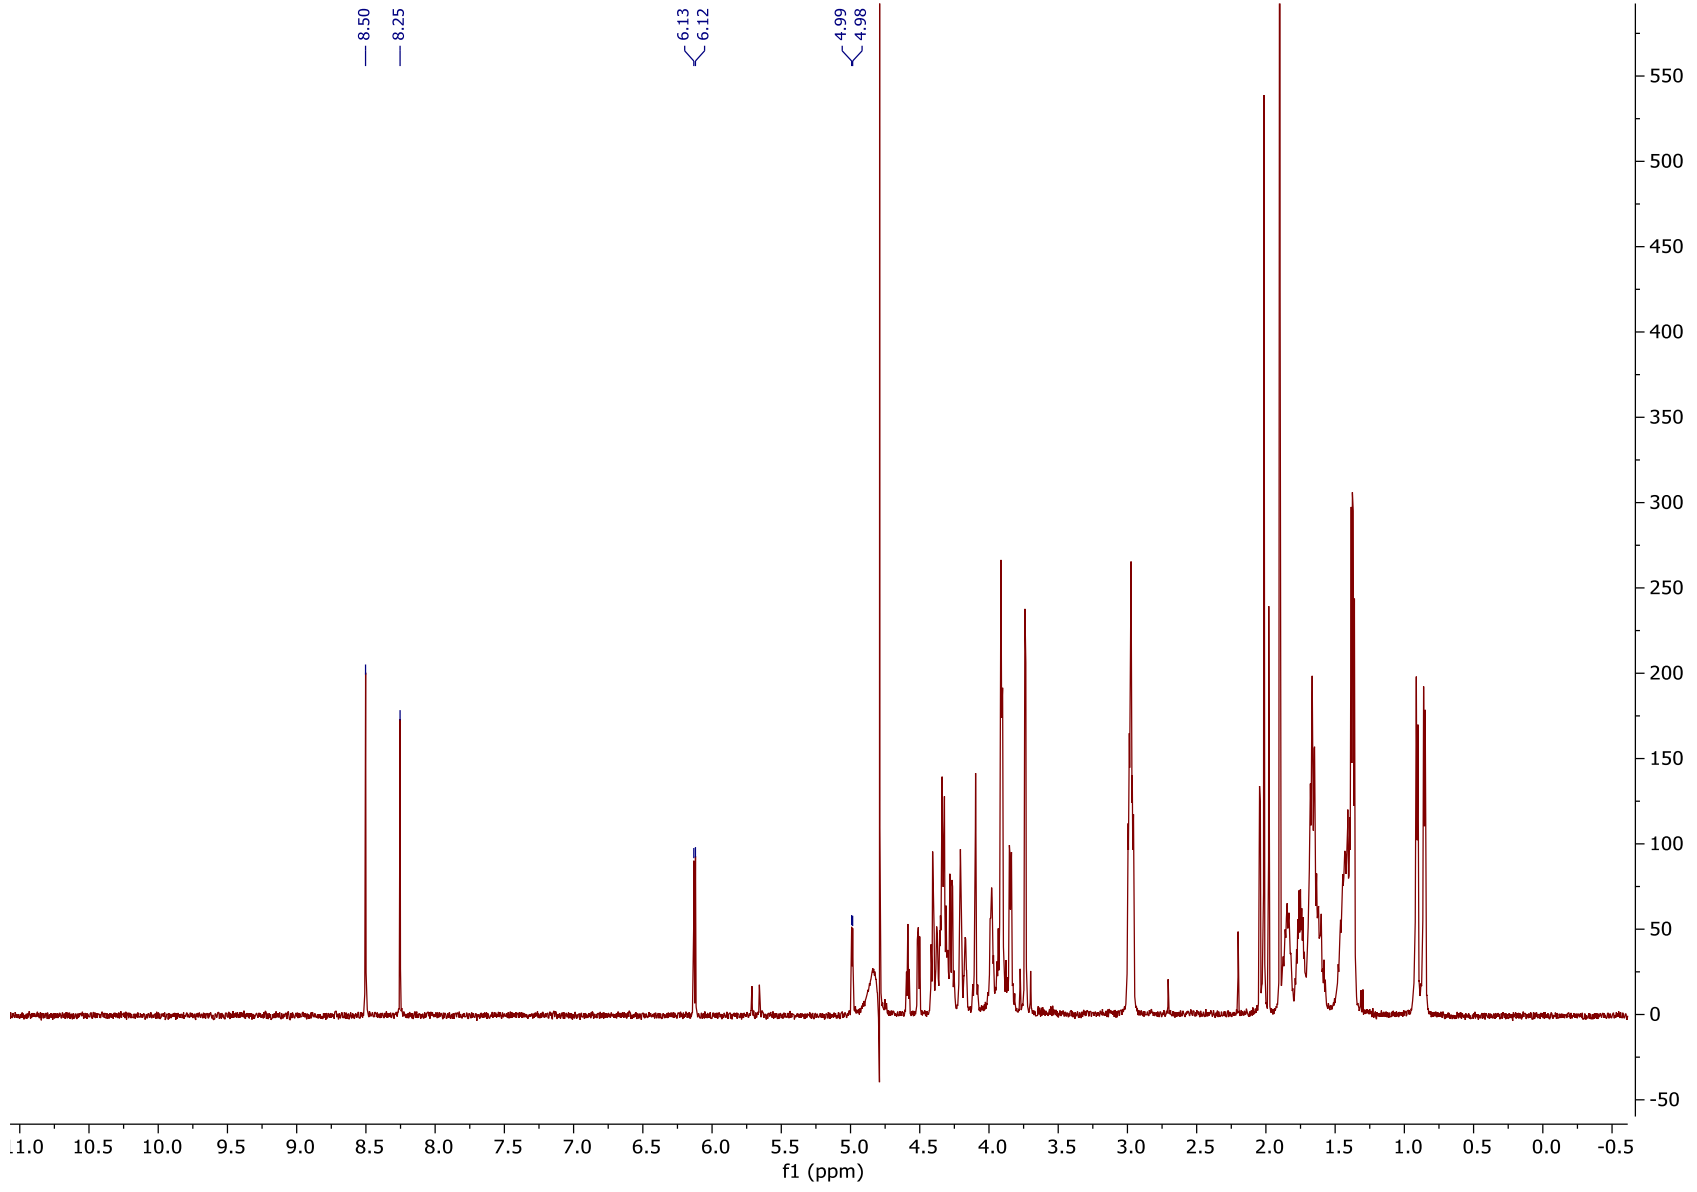

P-NMR Ac-GKS(ADPr)GAALSKKG-OH + EDTA

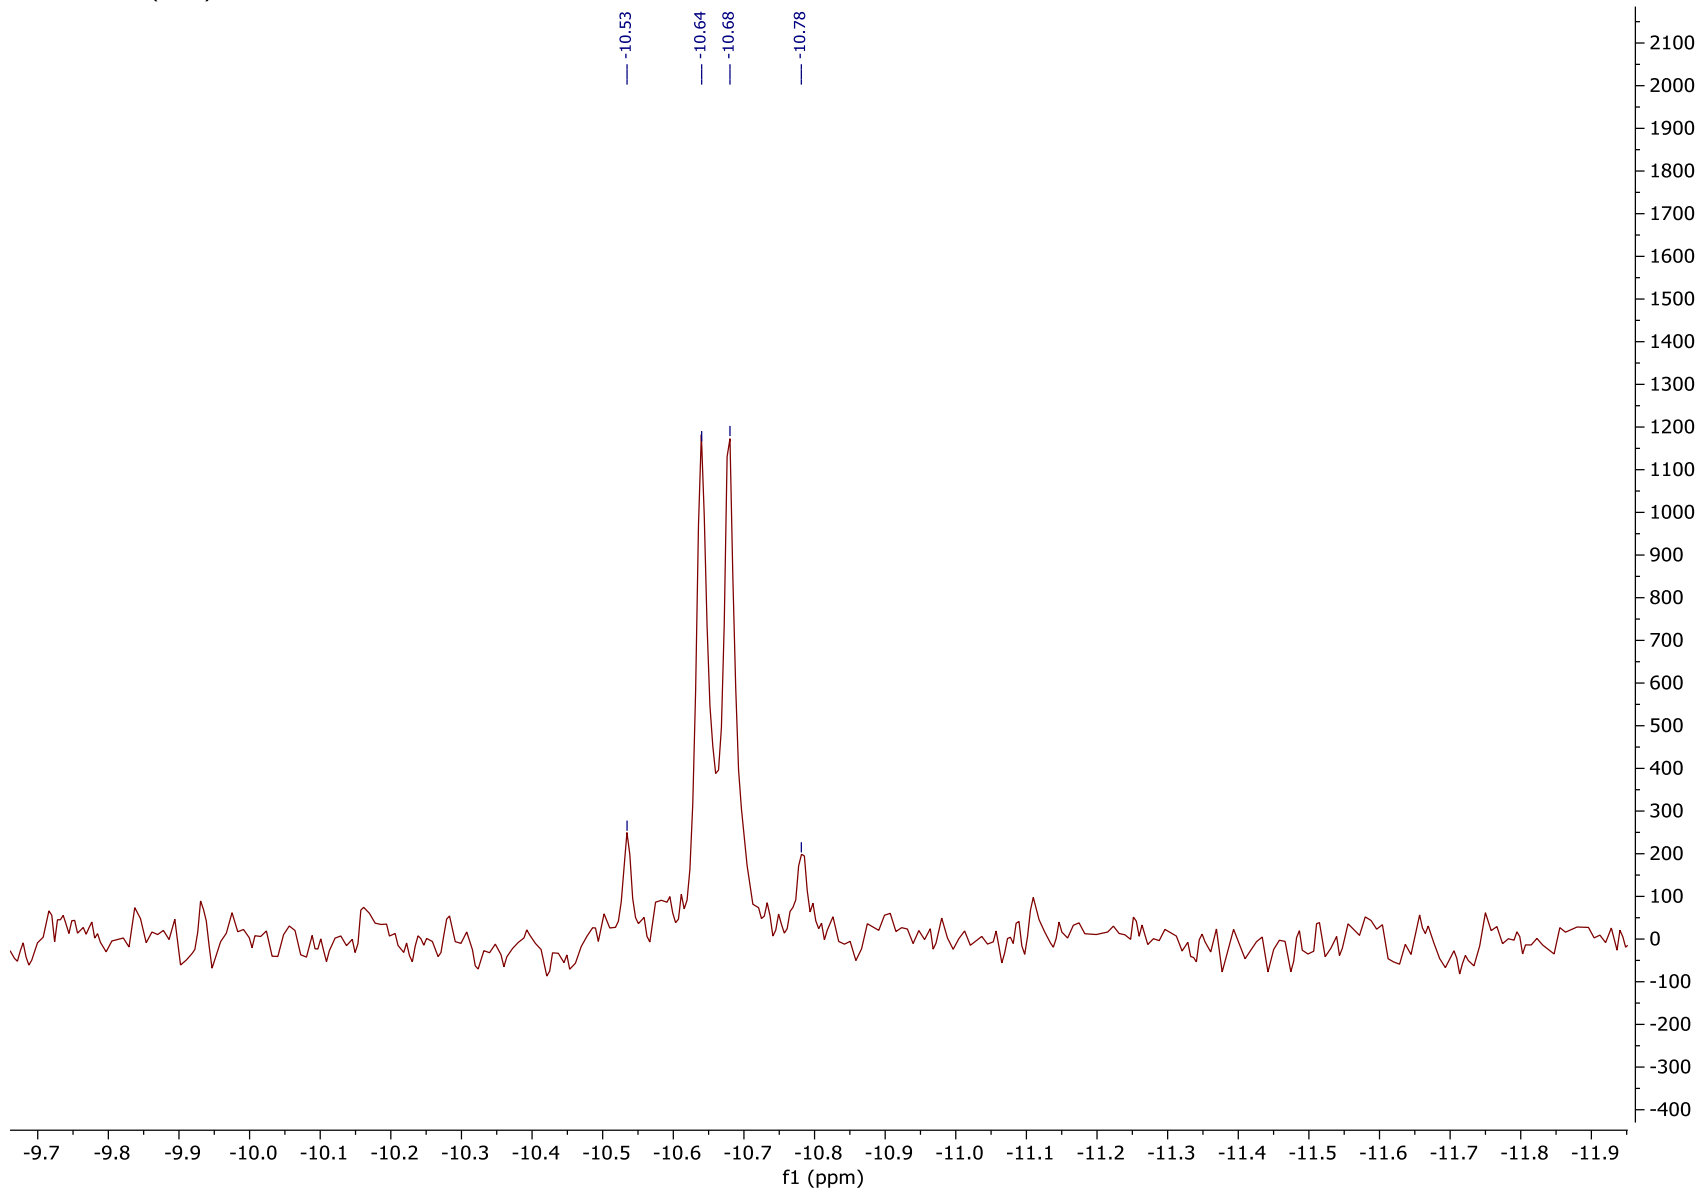



H-NMR Ac-GKS(ADPr)SGPTSLFAVTVAPPARG-OH

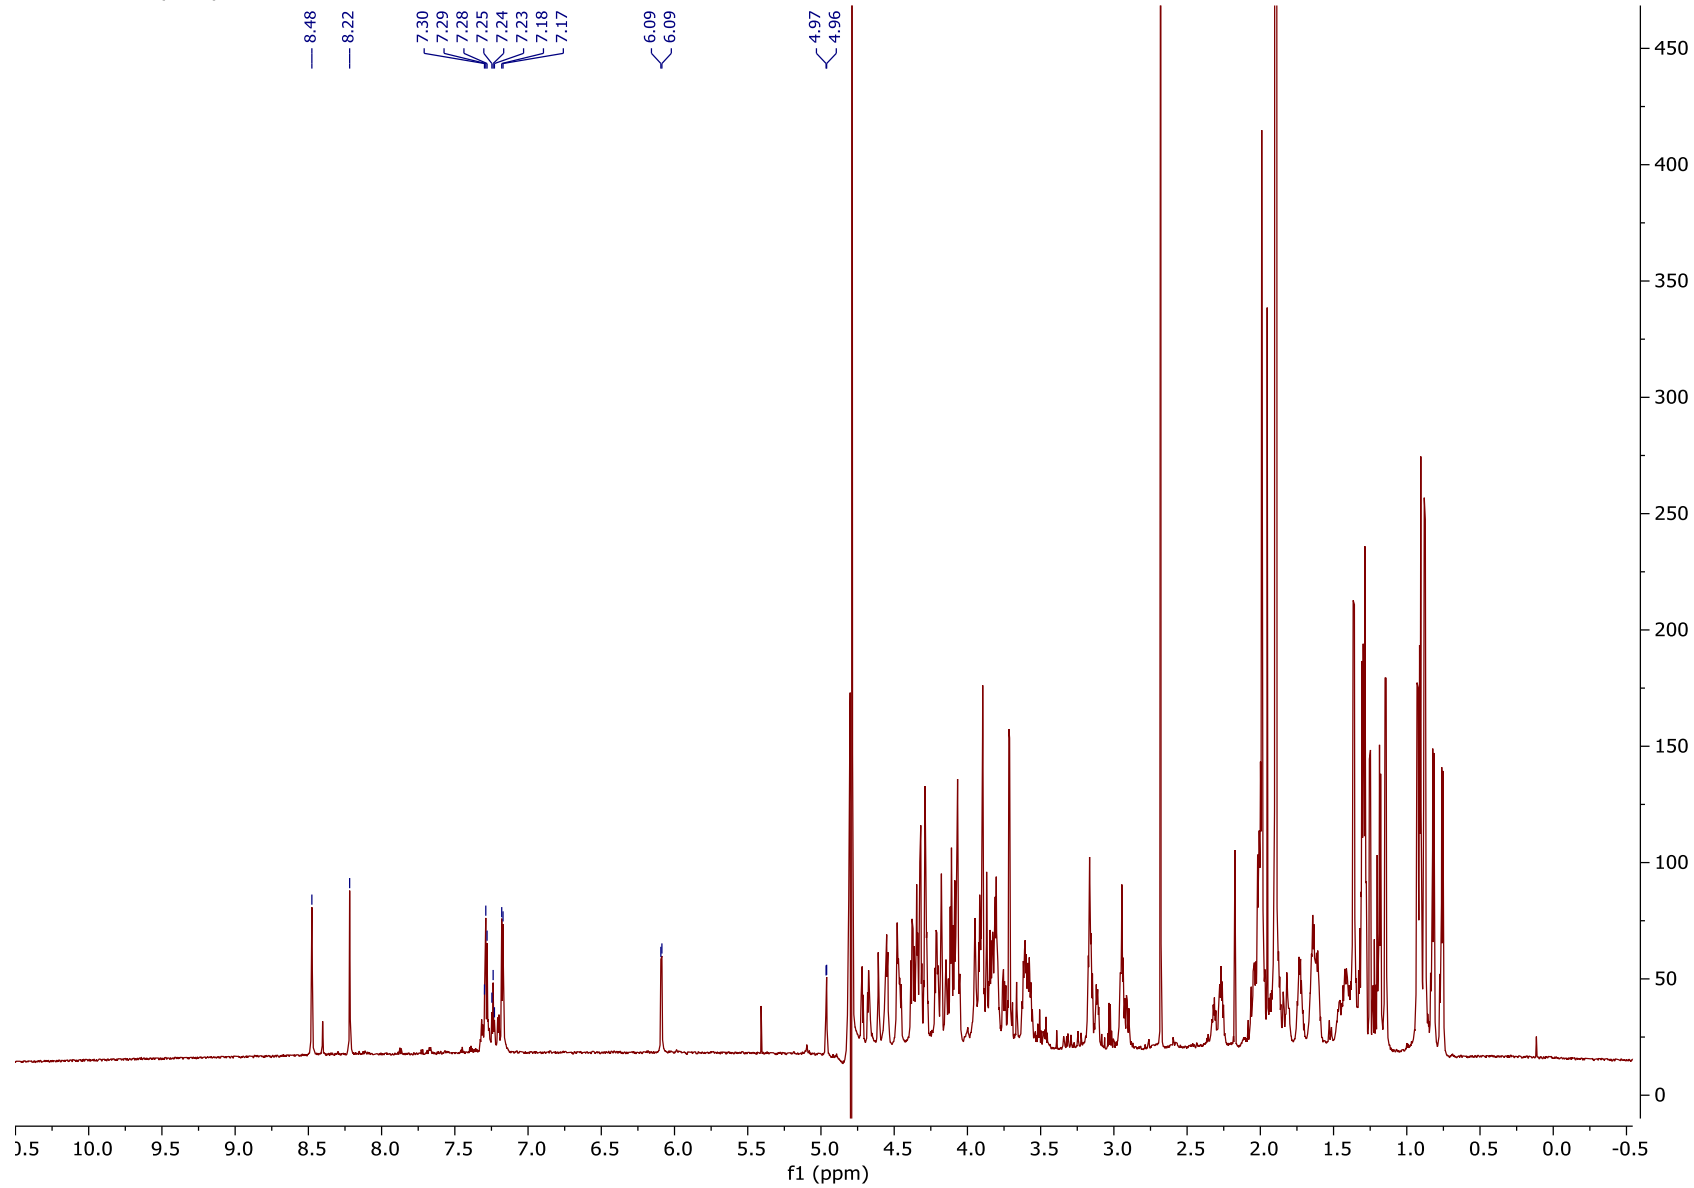

P-NMR Ac-GKS(ADPr)SGPTSLFAVTVAPPGARG-OH

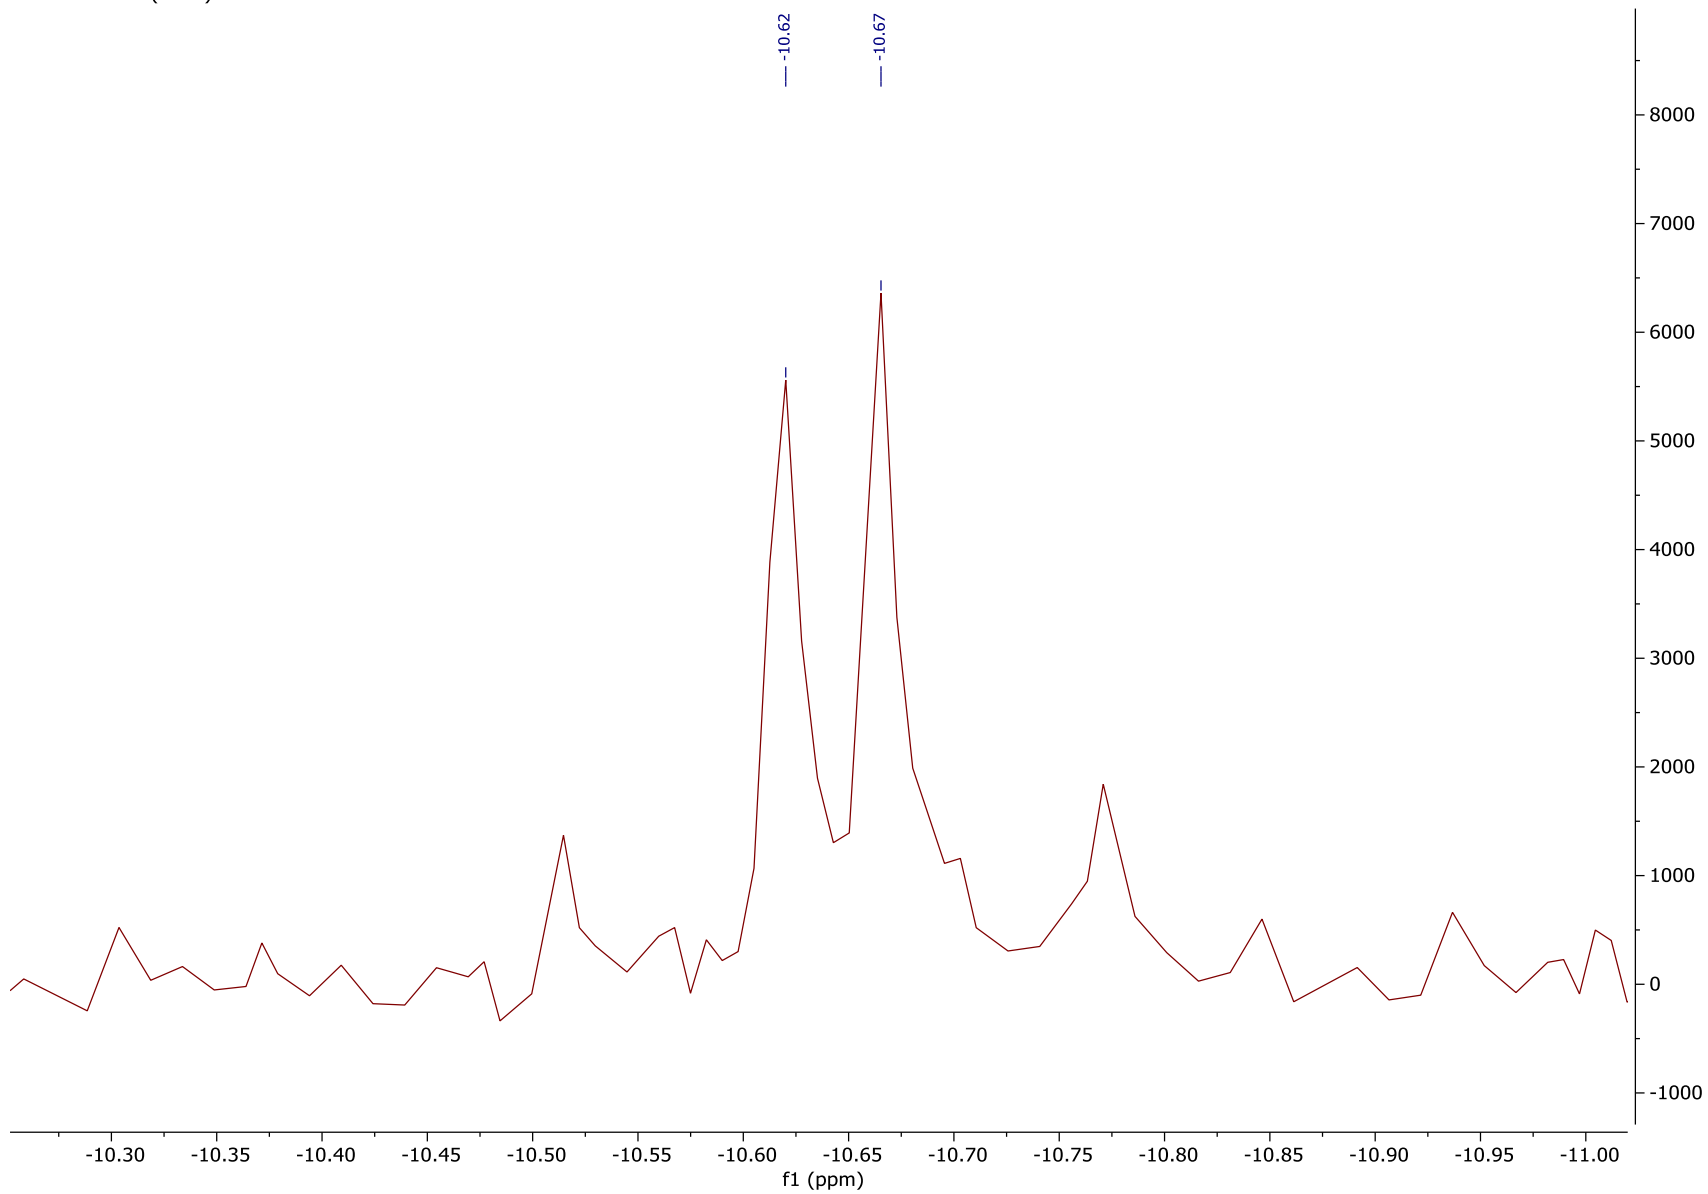

H-NMR Ac-GKSSGPT(ADPr)SLF-OH

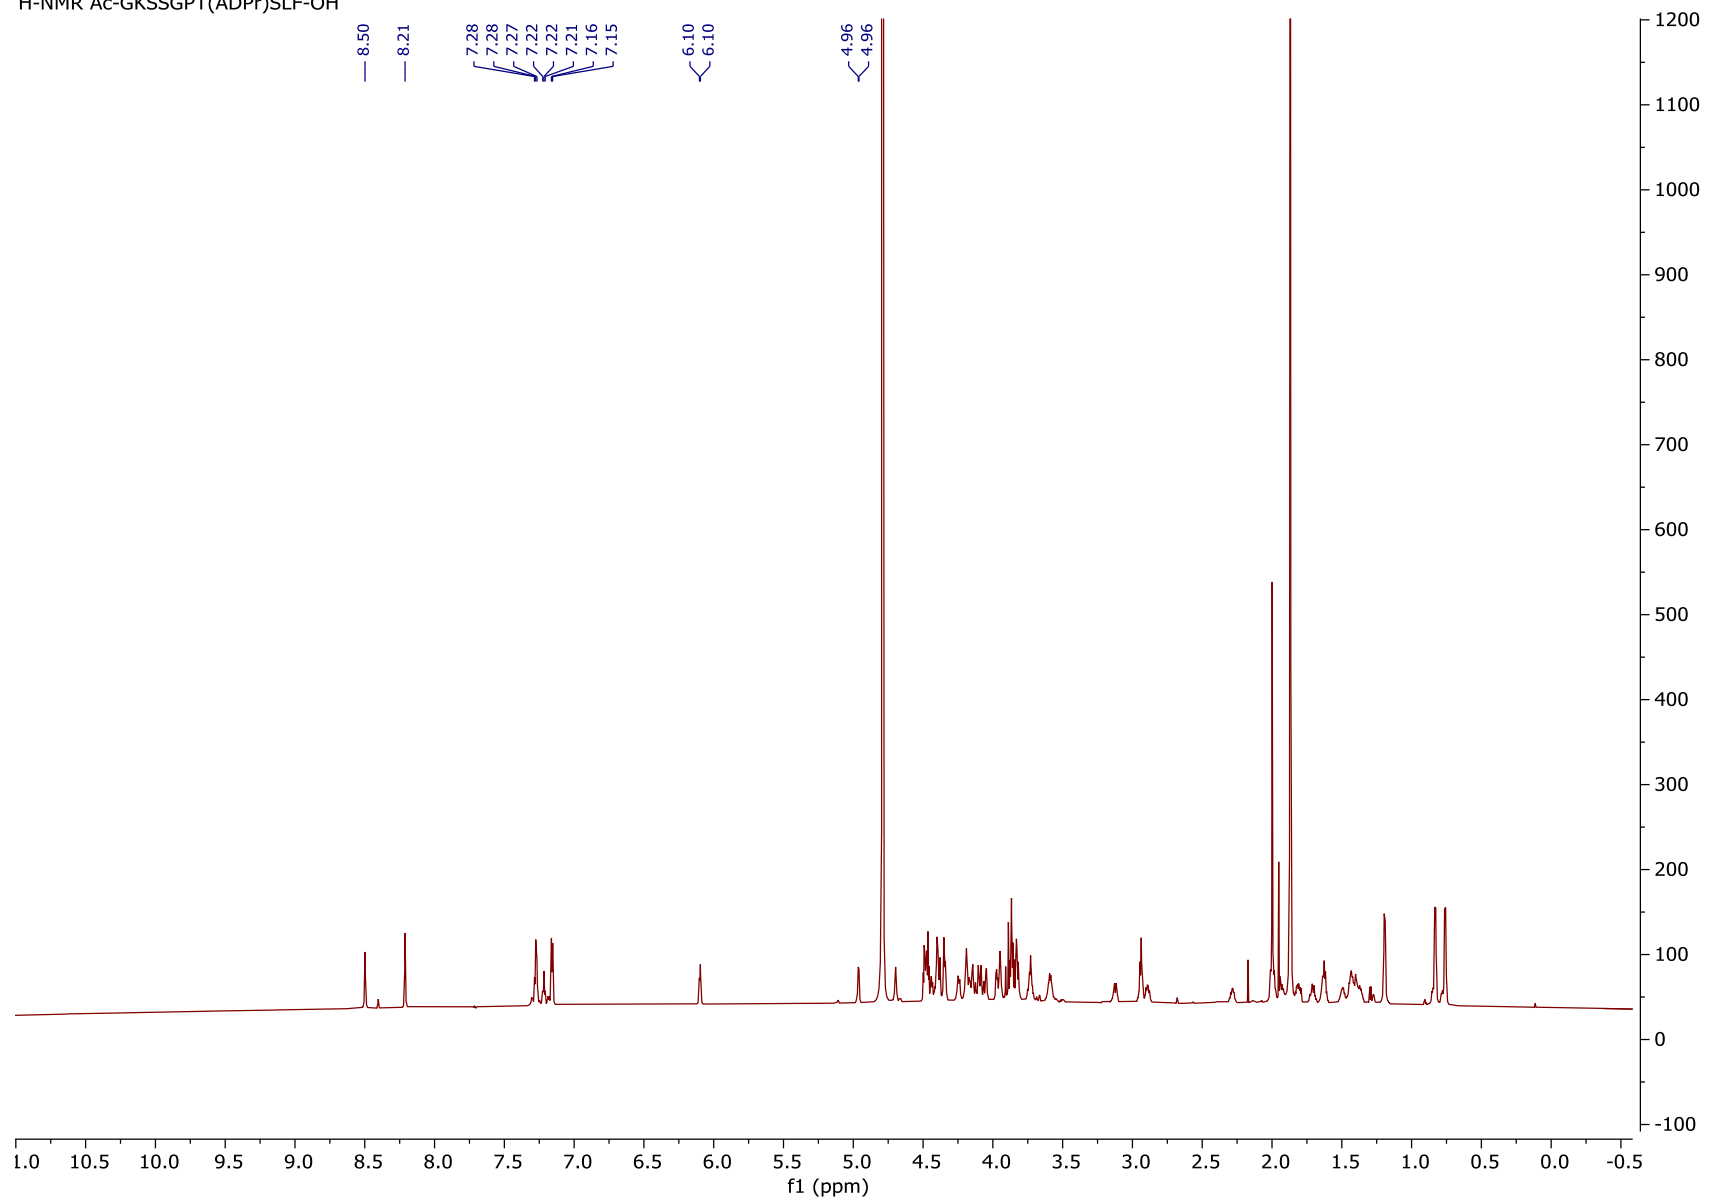

P-NMR Ac-GKSSGPT(ADPr)-SLF-OH

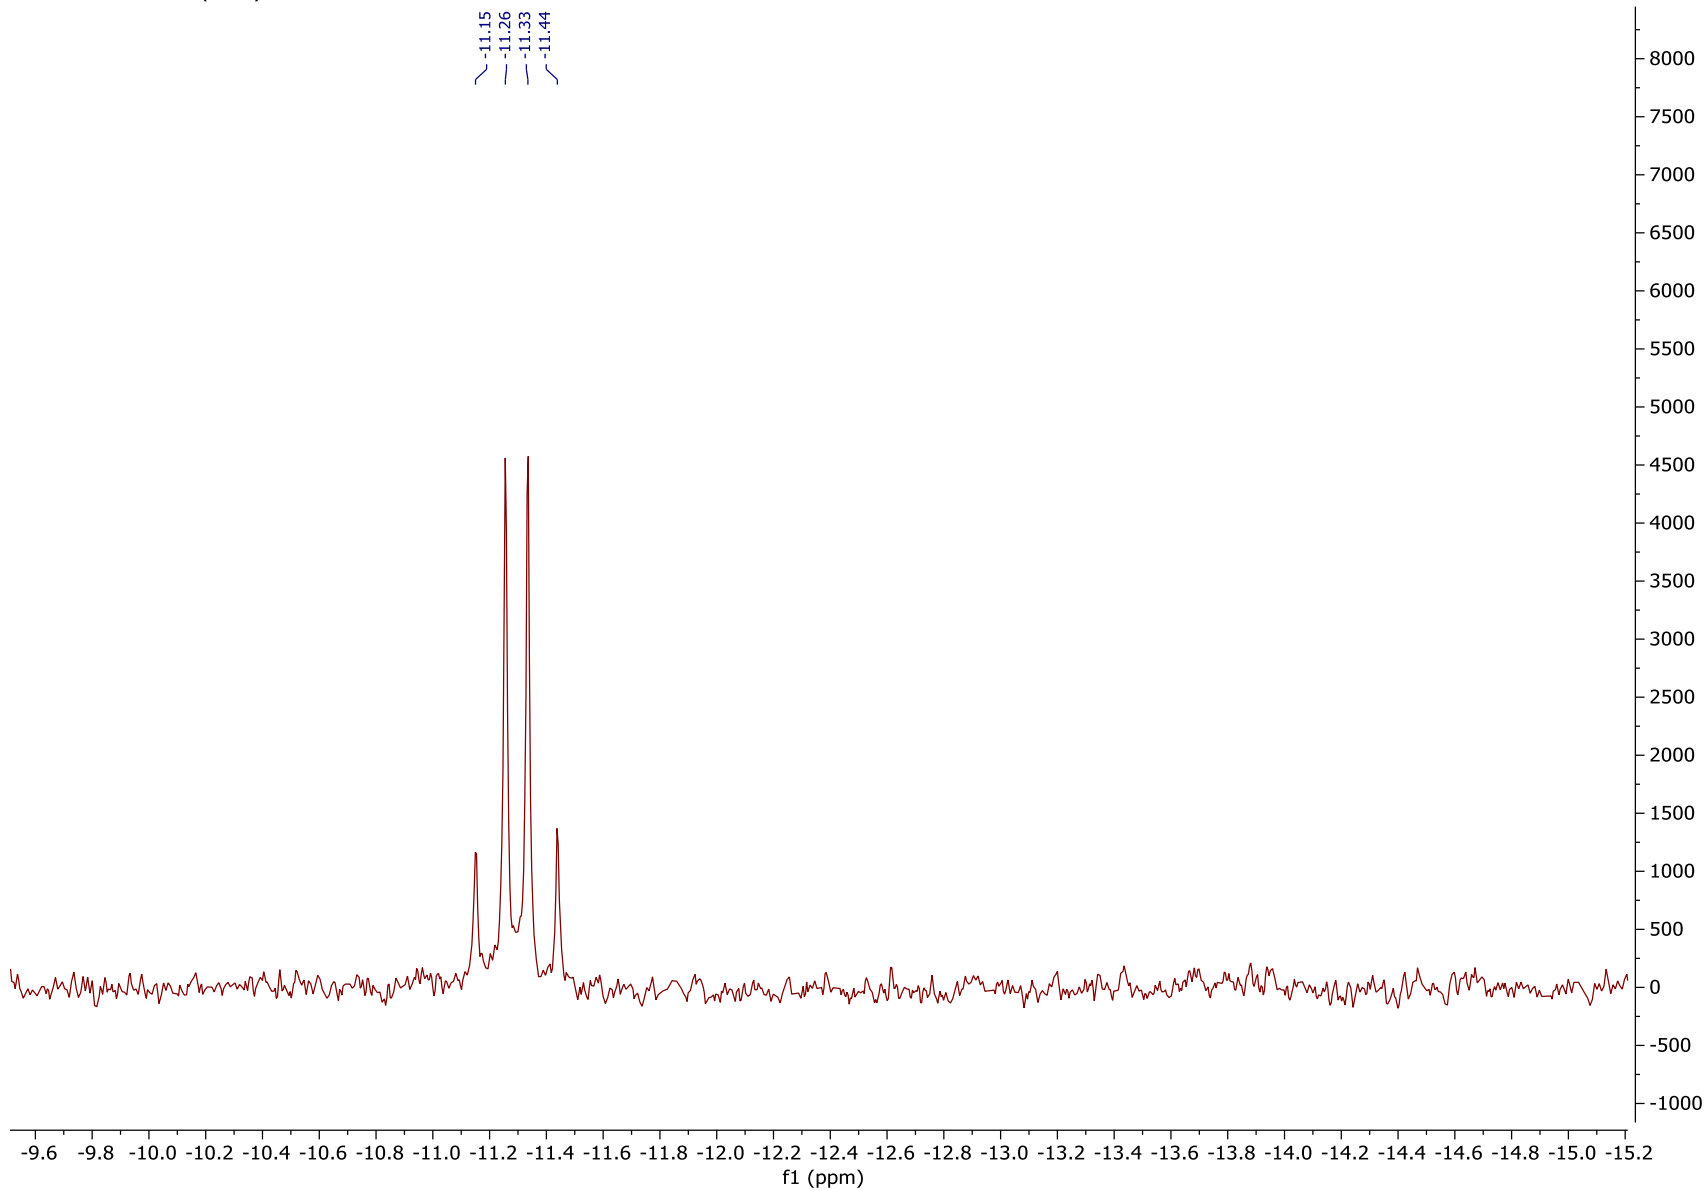

H-NMR Ac-KEST(ADPr)LHLVLRL-OH

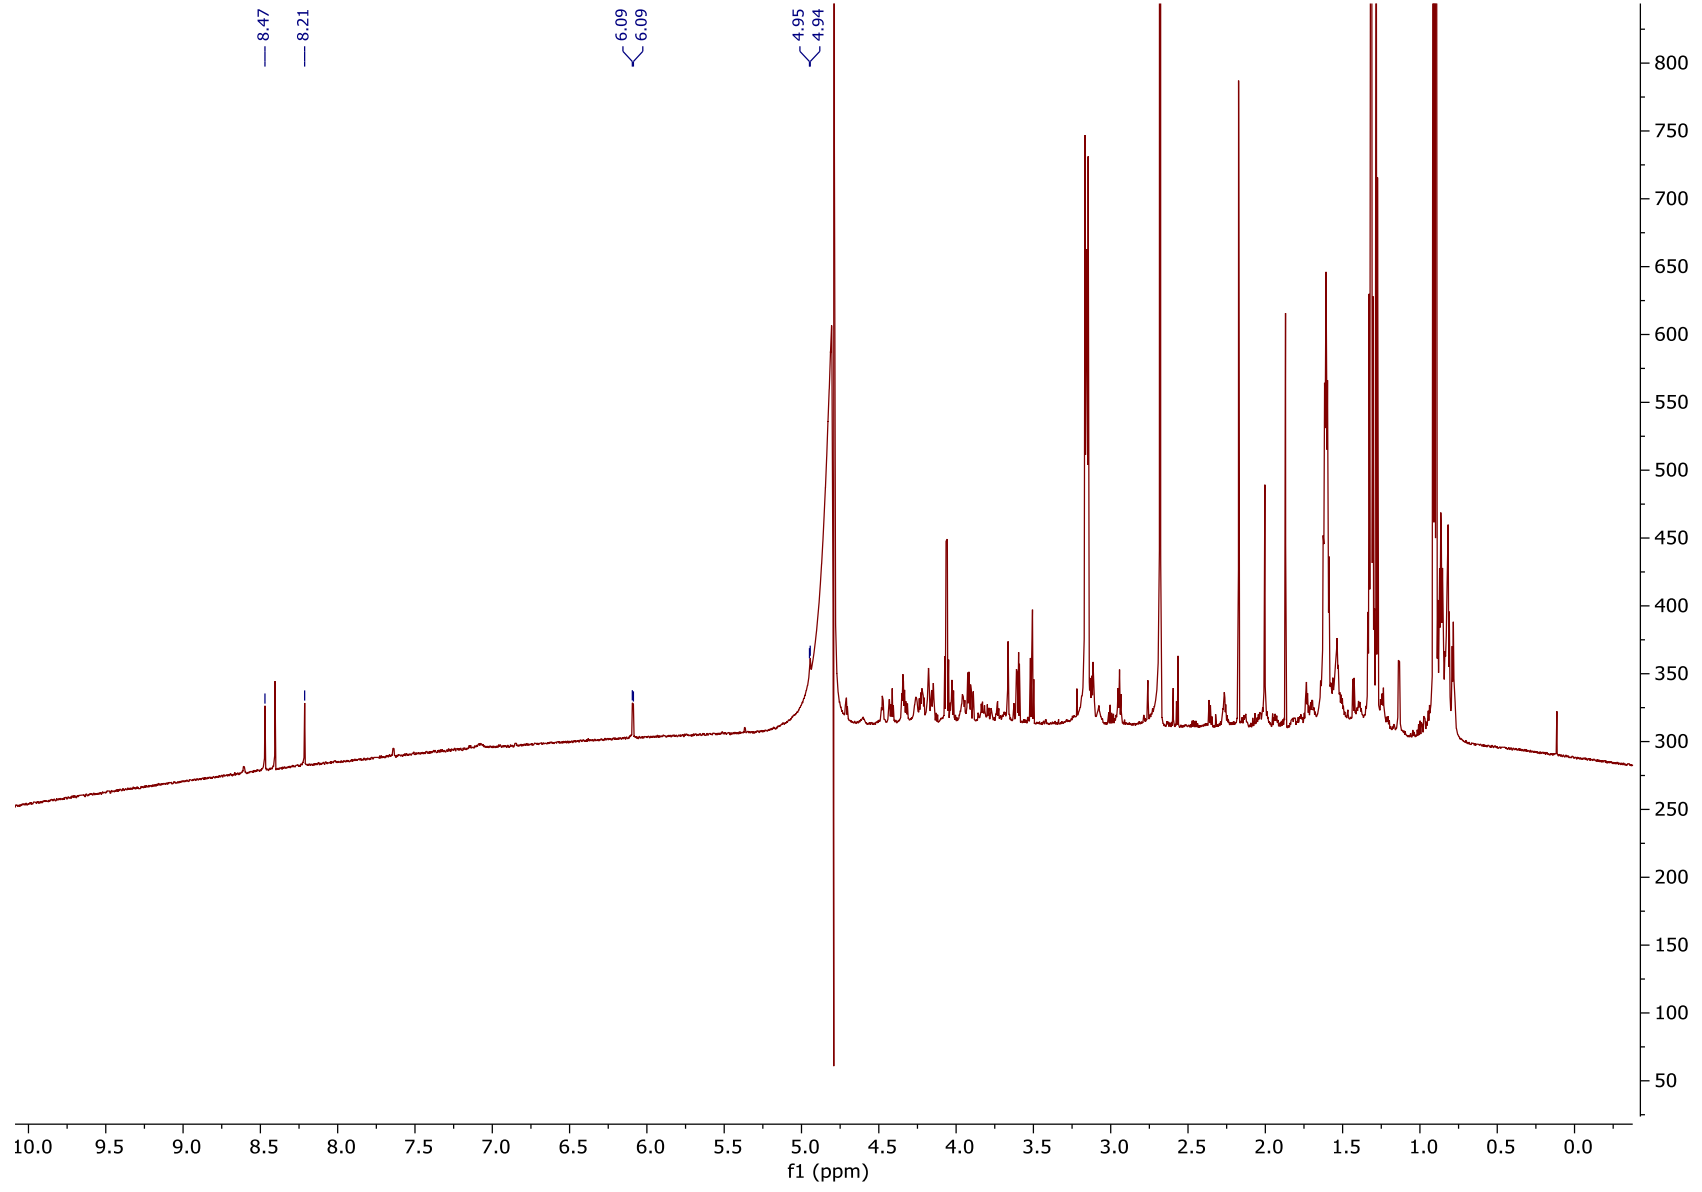

H-NMR Ac-PAKC(ADPr)APAPKKG-OH

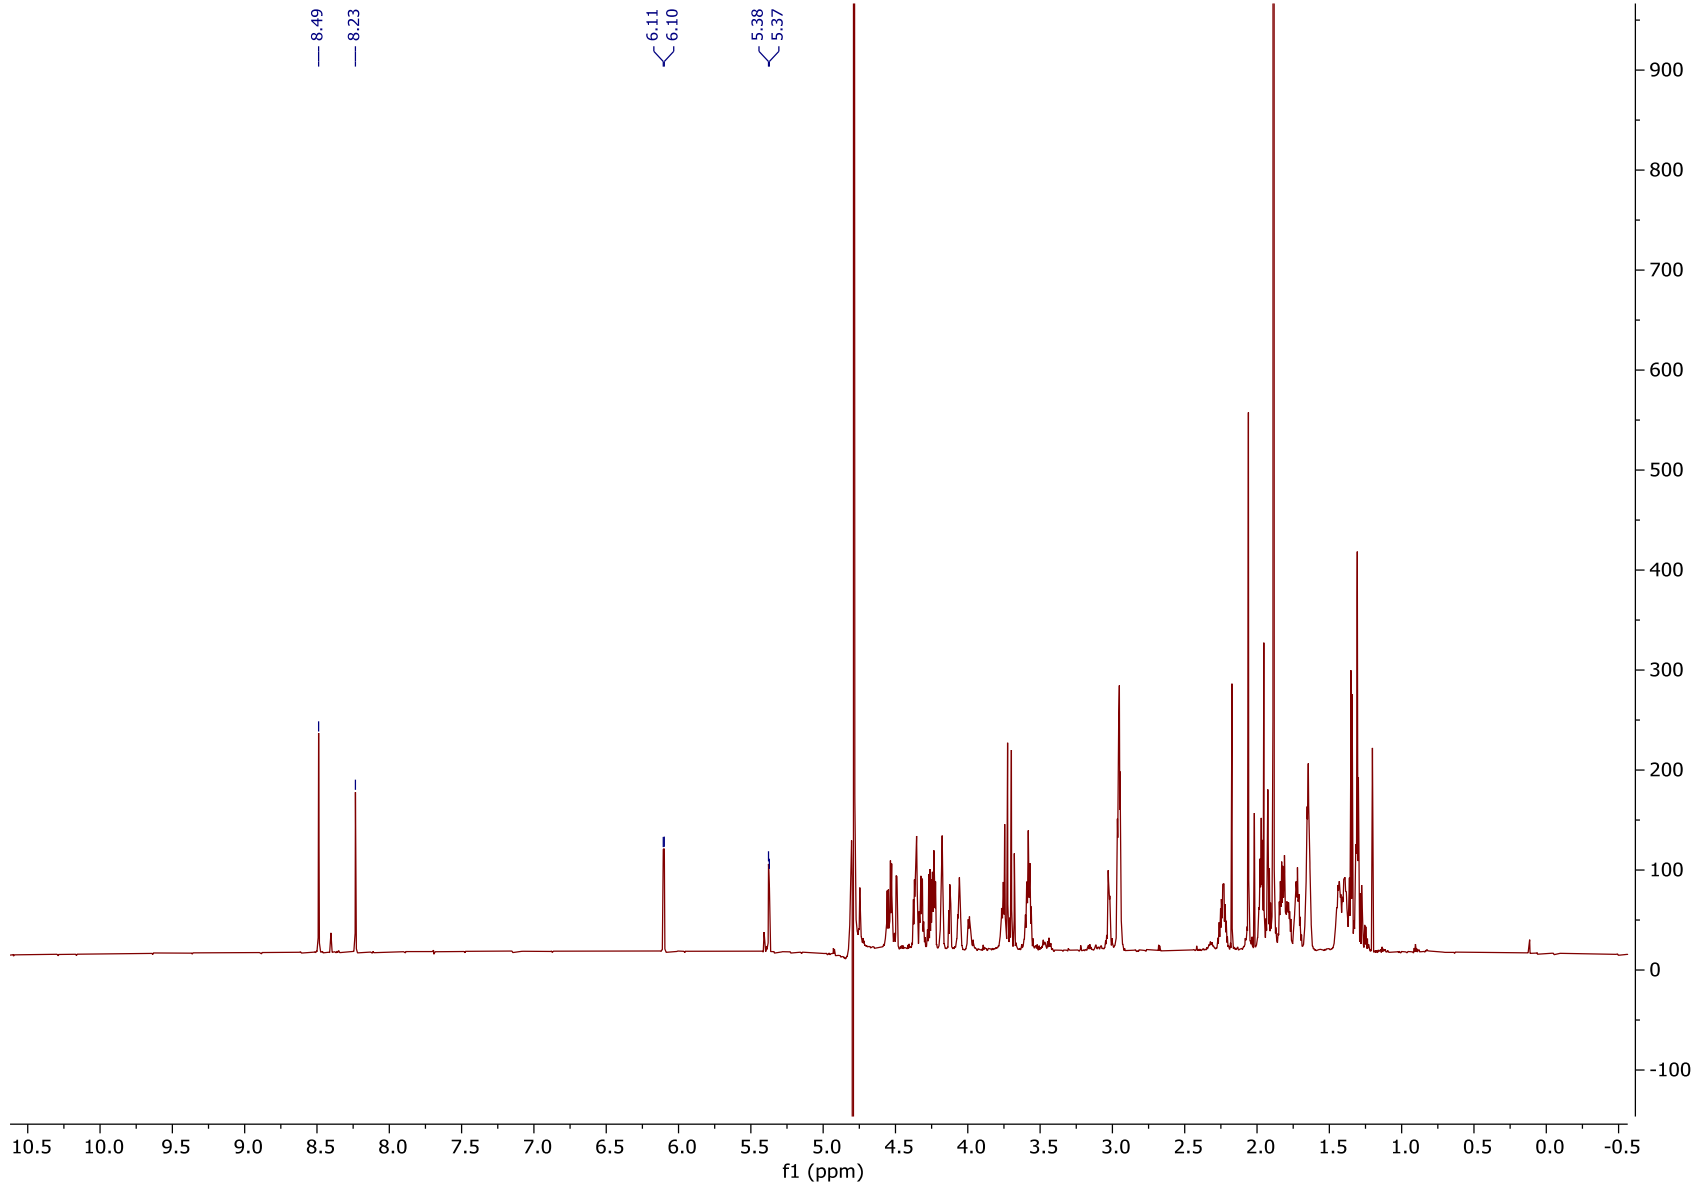

P-NMR Ac-PAKC(ADPr)APAPKKG-OH

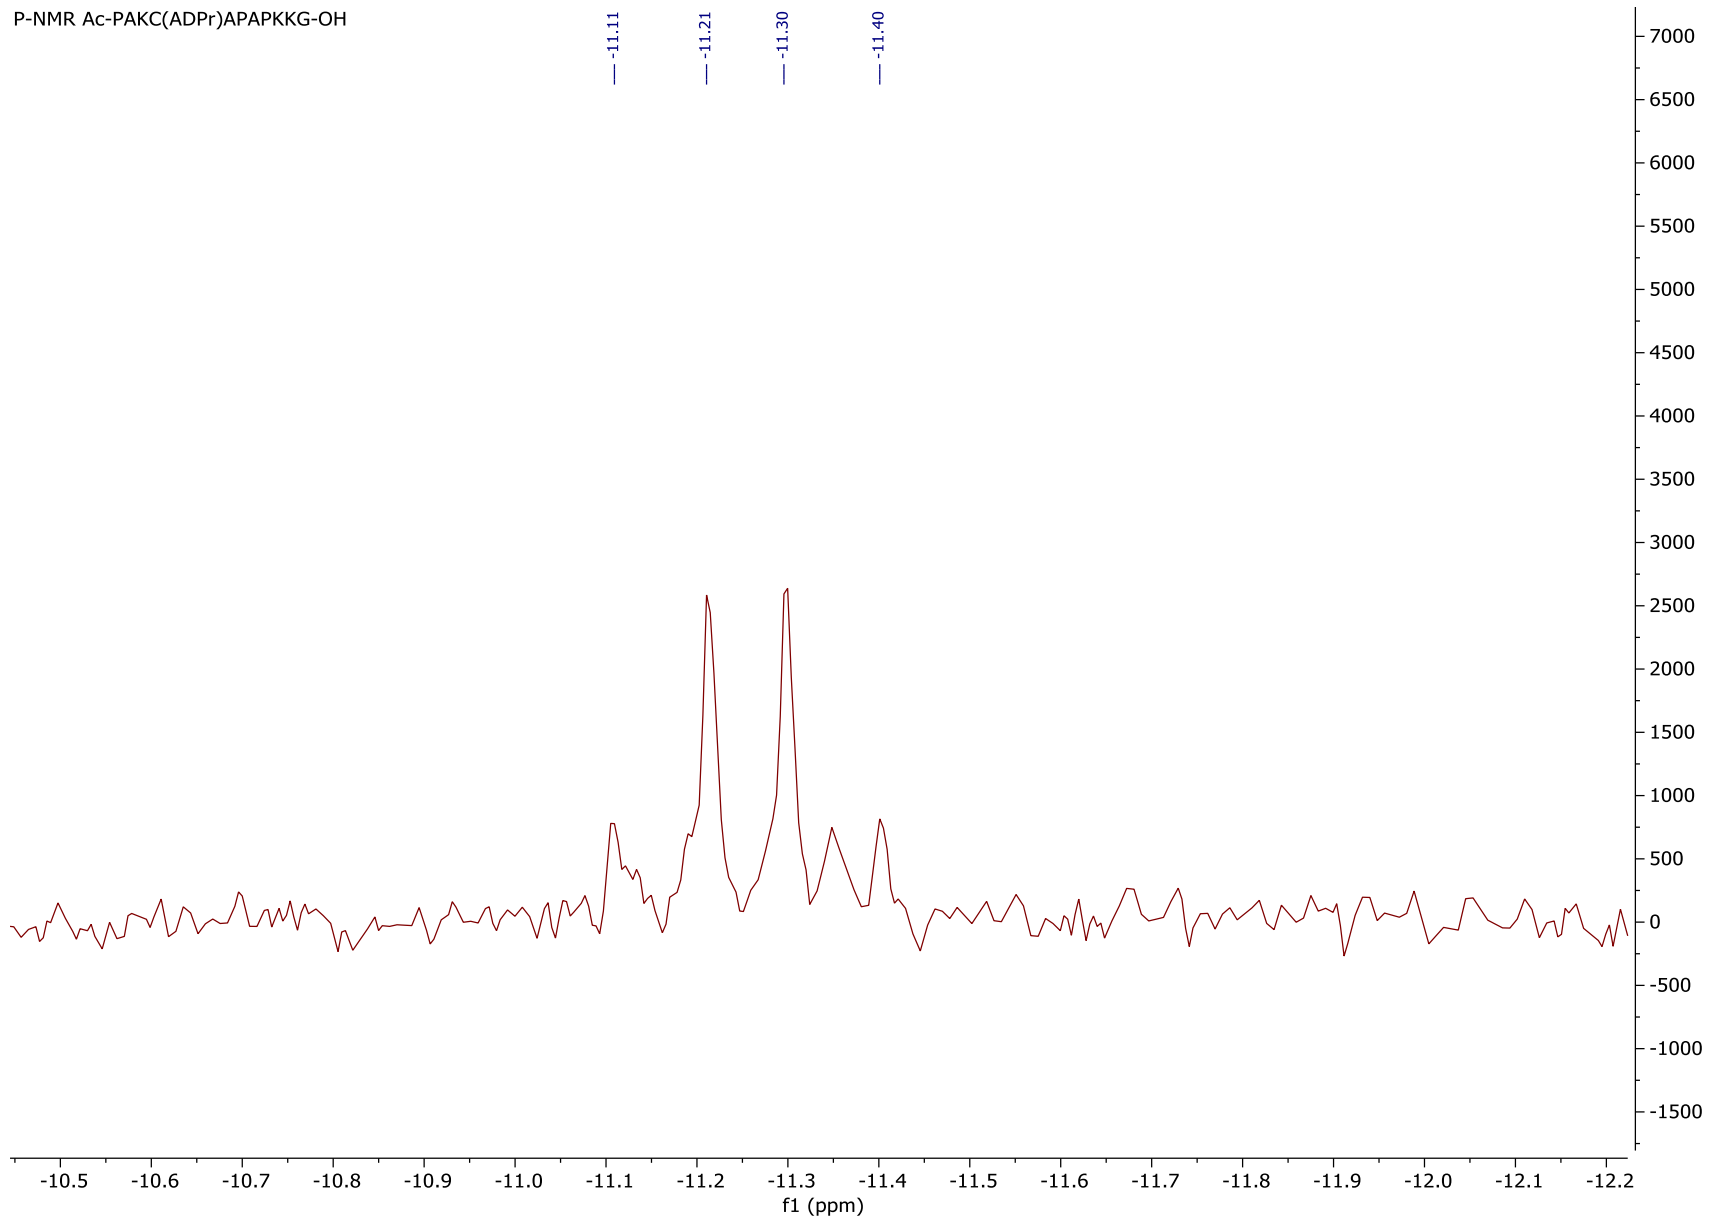

H-NMR biotin-PAKC(ADPr)APAPKKG-OH

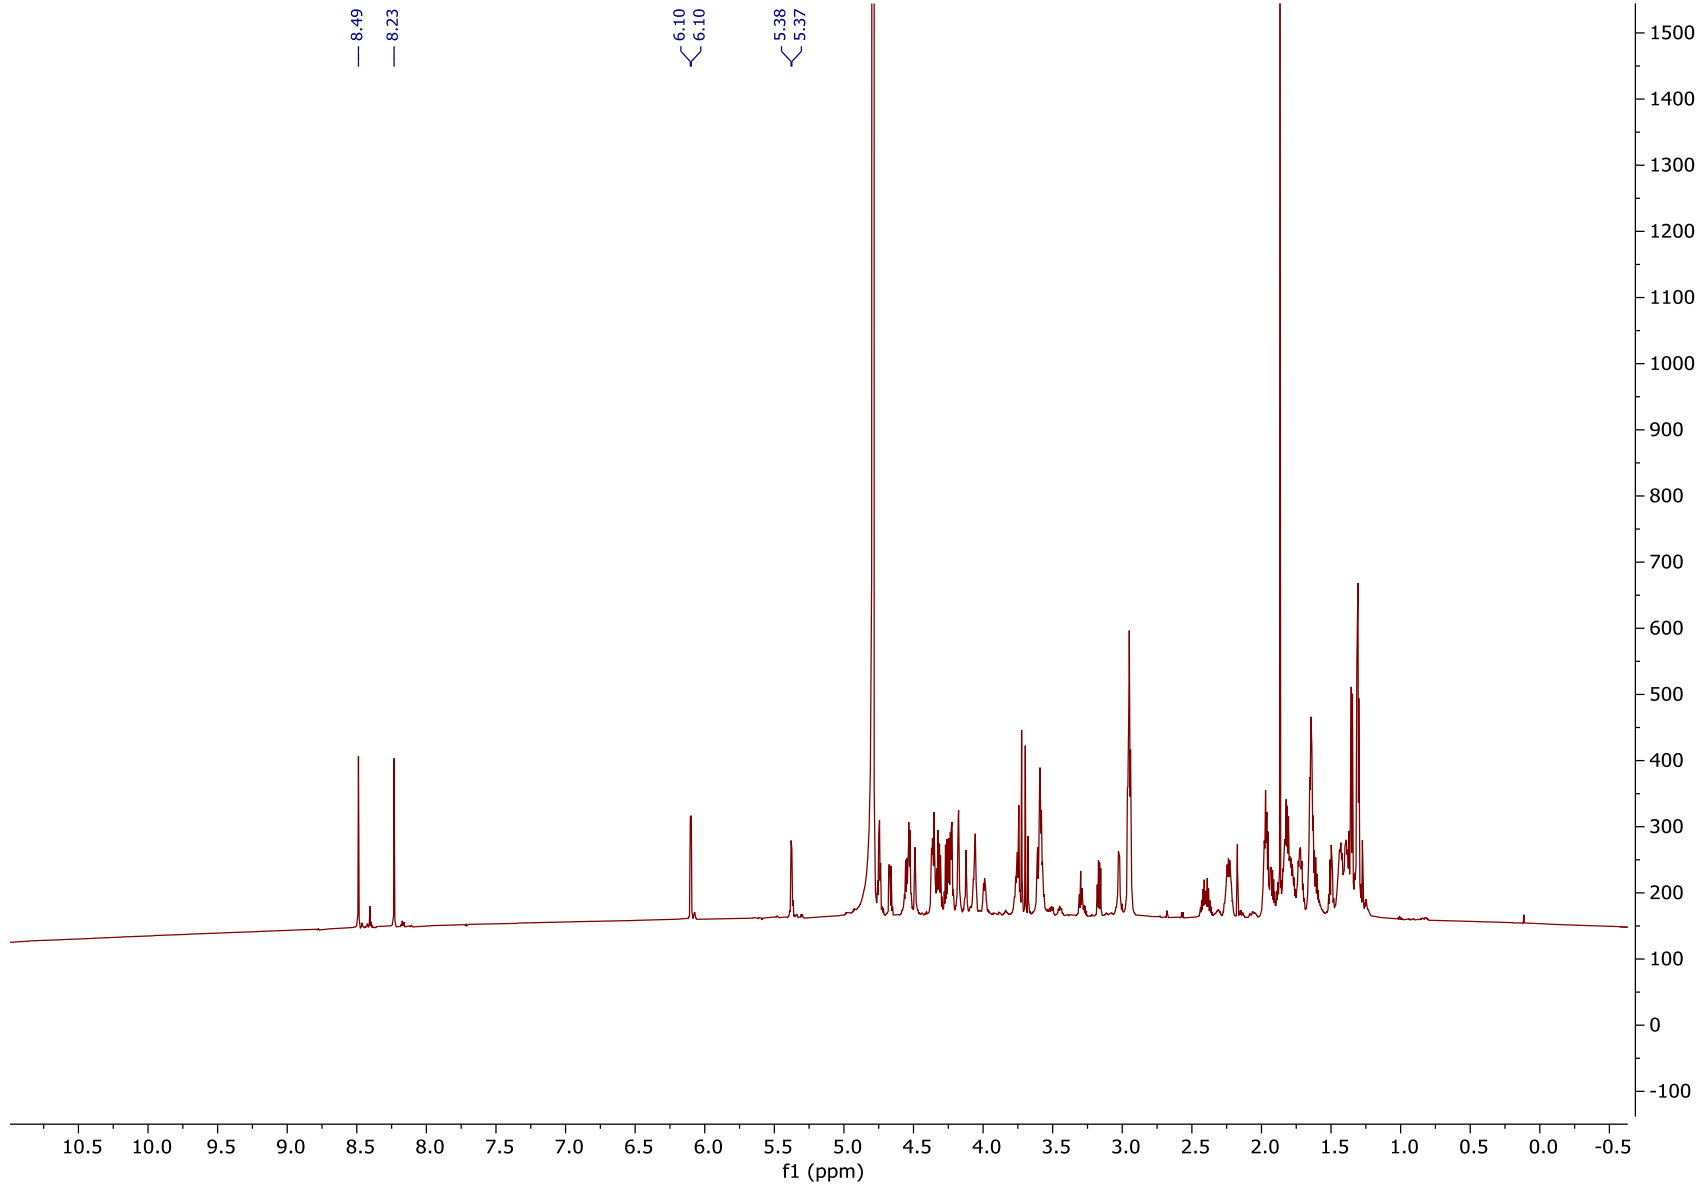



LC-MS trace 24

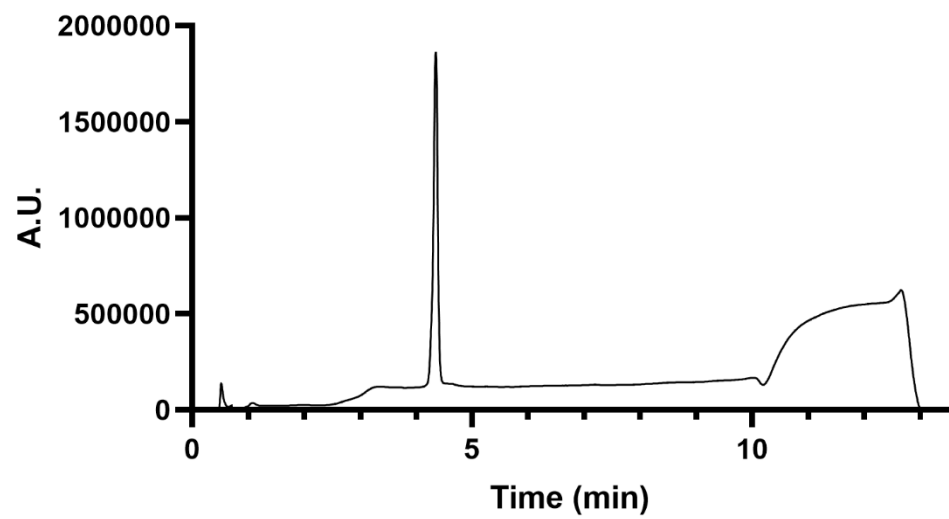

LC-MS trace 25

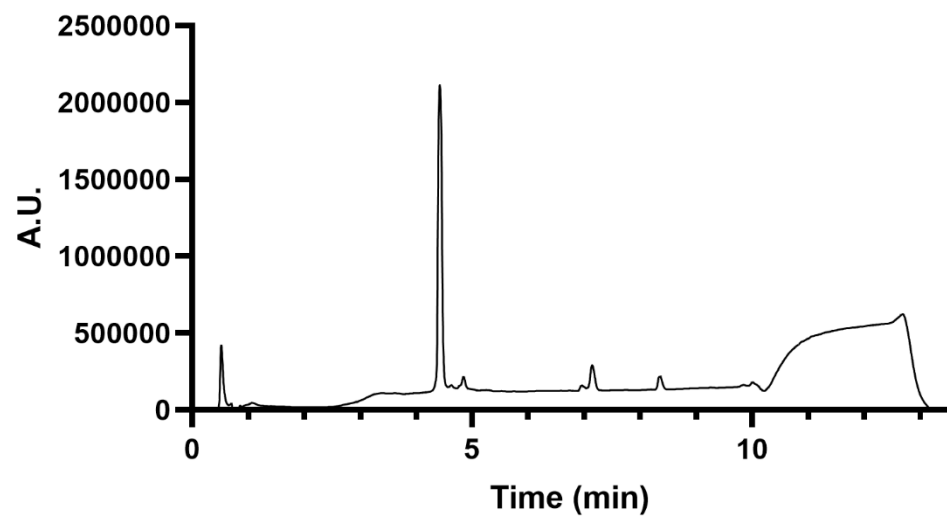

LC-MS trace 26

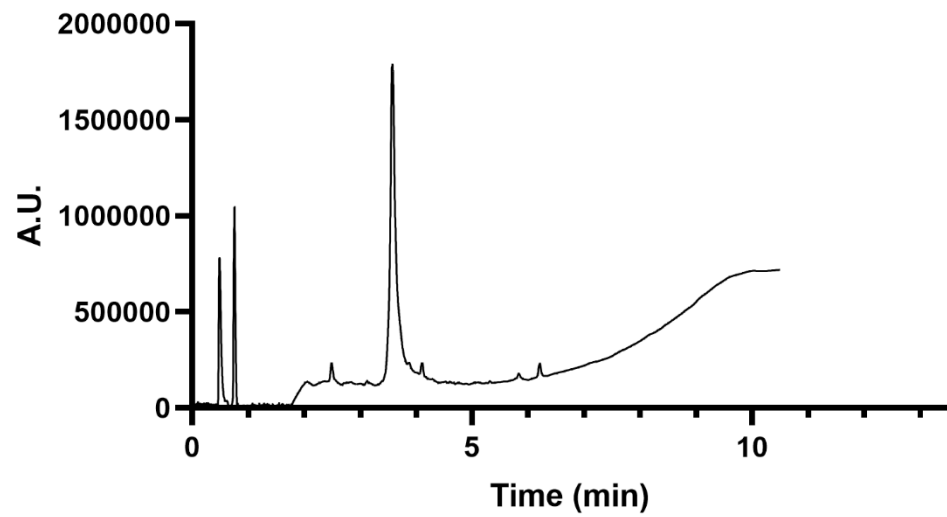

LC-MS trace 27

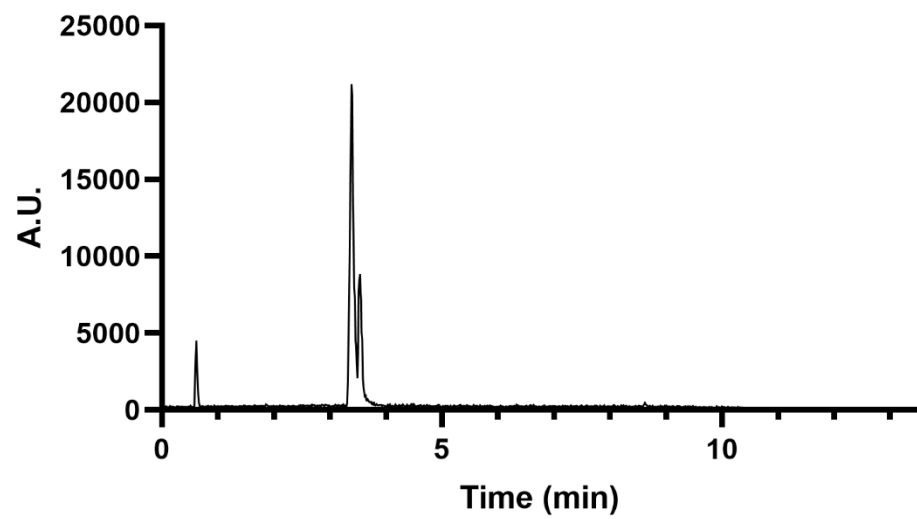

LC-MS trace 29

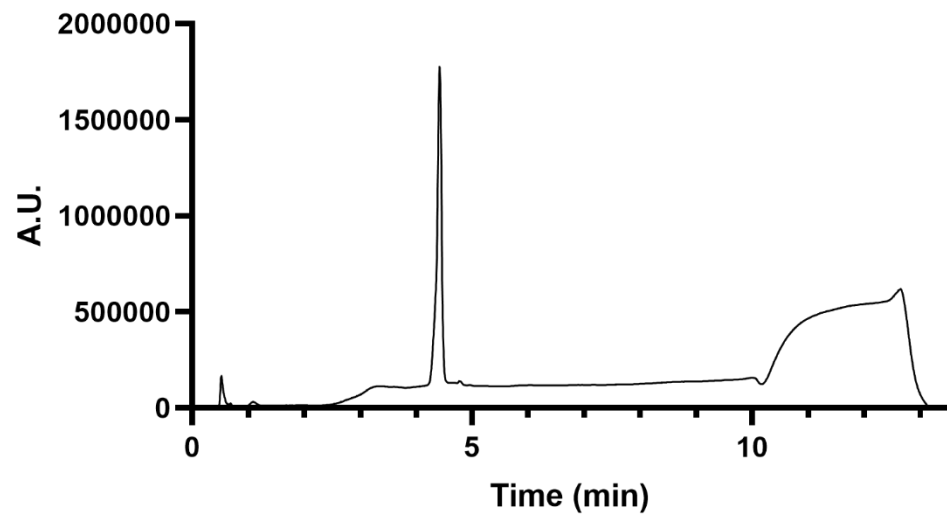

LC-MS trace 30

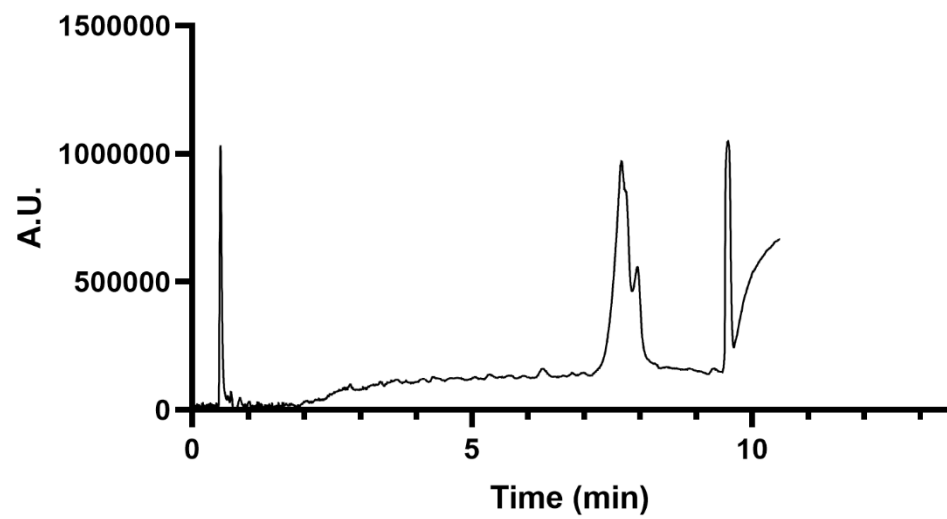

Supplement: CHEM-27-10621-s001.pdf [file CHEM-27-10621-s001.pdf]
